# Supplementary material
Source: publisher figshare collection journal article supplement (https://acs.figshare.com/ndownloader/files/4680037)

*Supporting Information*

for

**Zirconocene-Mediated Highly Regio- and Stereoselective Synthesis of  
Multisubstituted Olefins Starting from 1-Alkynylboronates**

Yasushi Nishihara,\* Mitsuru Miyasaka, Masanori Okamoto, Hideki Takahashi,  
Eiji Inoue, Kenki Tanemura, and Kentaro Takagi

*Division of Chemistry and Biochemistry, Graduate School of Natural Science and Technology,  
Okayama University, 3-1-1 Tsushimanaka, Okayama 700-8530, Japan*

Phone: +81-86-251-7855

Fax: +81-86-251-7855

Email: ynishiha@cc.okayama-u.ac.jp

*1. General*

*2. Experimental Procedures and Spectroscopic Data for New Compounds*

*3. Copies of  $^1\text{H}$  and  $^{13}\text{C}$  NMR Charts for the New Compounds*

**1. General.** All the reactions were carried out under an Ar atmosphere using standard Schlenk techniques. Glassware was dried in an oven (130 °C) and heated under reduced pressure before use. Dehydrated toluene, dichloromethane, hexane, and diethyl ether were purchased from Kanto Chemicals Co., Ltd. For thin layer chromatography (TLC) analyses throughout this work, Merck precoated TLC plates (silica gel 60 GF<sub>254</sub>, 0.25 mm) were used. Silica gel column chromatography was carried out using Silica gel 60 N (spherical, neutral, 40-100  $\mu$ m) from Kanto Chemicals Co., Ltd. NMR spectra ( $^1\text{H}$ ,  $^{13}\text{C}\{^1\text{H}\}$ ,  $^{11}\text{B}\{^1\text{H}\}$ , and  $^{19}\text{F}\{^1\text{H}\}$ ) were recorded on Varian INOVA-600 (600 MHz) or Mercury-300 (300 MHz) spectrometers. Peak positions of the  $^{11}\text{B}\{^1\text{H}\}$  NMR spectra were referenced to an external  $\text{BF}_3 \cdot \text{OEt}_2$ . Infrared spectra were recorded on a Shimadzu IRPrestige-21 spectrophotometer. GC analyses were performed on a Shimadzu GC-14A equipped with a flame ionization detector using Shimadzu Capillary Column (CBP1-M25-025) and Shimadzu C-R6A-Chromatopac integrator. Melting Points were measured on a Yanagimoto micromelting point apparatus and are uncorrected. The GC yields were determined using suitable hydrocarbon internal standards. GC/MS analyses were carried out on a SHIMADZU GC-17A equipped with a SHIMADZU QP-5050 GC-MS system. Elemental analyses were carried out with a Perkin-Elmer 2400 CHN elemental analyzer at Osaka City University.

## 2. Experimental procedures and Spectroscopic Data for New Compounds

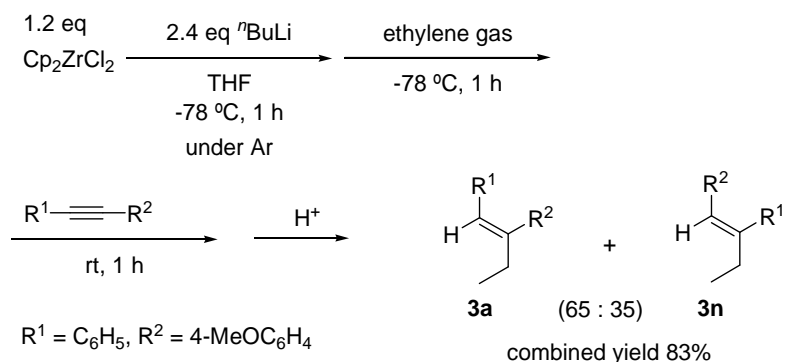

**Regioselectivity upon Formation of Zirconacyclopentene using Unsymmetrical Diarylethyne.** To a solution of zirconocene dichloride (702 mg, 2.4 mmol) in THF (12 mL) was added dropwise butyllithium (3 mL, 4.8 mmol, 1.6 M hexane solution) at -78 °C. The reaction mixture was stirred for 1 h at -78 °C and then atmospheric ethylene gas was introduced into a vessel at -78 °C. The reaction mixture was warmed to room temperature and 1-(methoxyphenyl)-2-phenylethyne (417 mg, 2.0 mmol) was added. The reaction mixture was stirred for 1 h, quenched with 1.0 M HCl, and extracted with diethyl ether. Organic layer was separated and the

aqueous layer was extracted with diethyl ether. The combined ethereal layers were washed with brine, and dried over  $\text{MgSO}_4$ . Filtration and concentration under vacuum, followed by purification with bulb to bulb distillation (180 °C/2 Torr) gave a mixture of **3a** and **3n** (combined yield was 83%, **3a**: **3n** = 65:35 determined by  $^1\text{H}$  NMR and GC measurements). Regio- and stereochemistry of the synthesized compounds **3a** and **3n** was determined by comparison of spectroscopic data of authentic samples obtained in this paper.

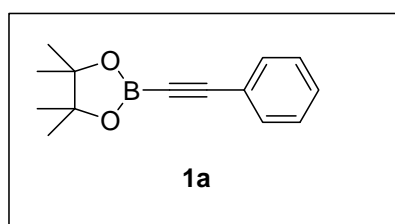

**General Procedure for 1-Alkynyldioxaborolanes 1: Synthesis of 4,4,5,5-Tetramethyl-2-(phenylethynyl)-1,3,2-dioxaborolane (1a).**<sup>1</sup> To a solution of phenylacetylene (1.32 mL, 12 mmol) in THF (30 mL) in a 50 mL of Schlenk tube -78 °C under an Ar atmosphere were added dropwise n-BuLi (7.5 mL, 1.6 M hexane solution, 12 mmol). The reaction mixture was stirred for 1 h at -78 °C. The resulting reaction mixture was then added to a solution of 4,4,5,5-tetramethyl-2-(1-methylethoxy)-1,3,2-dioxaborolane (2.04 mL, 10 mmol) in THF (30 mL) -78 °C. After being stirred for 2 h at -78 °C, the reaction mixture was quenched with 1.0 M HCl/Et<sub>2</sub>O (12.6 mL, 12.6 mmol), and the mixture was warmed to room temperature with additional 1 h stirring. Filtration and evaporation afforded a pale yellow oil. Bulb to bulb distillation (160 °C/2 Torr) gave **1a** (2.22 g, 9.72 mmol, 97% yield) as white solid. Mp. 58-60 °C. FT-IR (neat,  $\text{cm}^{-1}$ ): 2981 (m), 2195 ( $\nu(\text{C}\equiv\text{C})$ , w), 1461 (m), 1388 (m), 1372 (m), 1130 (m), 692 (s).  $^1\text{H}$  NMR ( $\text{CDCl}_3$ , 300 MHz, rt)  $\delta$  1.33 (s, 12H), 7.26-7.36 (m, 3H), 7.51-7.54 (m, 2H);  $^{13}\text{C}\{^1\text{H}\}$  NMR ( $\text{CDCl}_3$ , 75 MHz, rt):  $\delta$  24.6, 84.4, 101.7, 121.8, 128.2, 129.4, 132.5. The carbon signal attached to B was not observed due to low intensity;  $^{11}\text{B}$  NMR ( $\text{CDCl}_3$ , 96 MHz, rt)  $\delta$  24.05. MS (EI, m/z (relative intensity)): 228 ( $\text{M}^+$ , 34), 213 (23), 170 (33), 155 (18), 143 (74), 129 (100), 124 (13), 102 (12), 85 (16), 77 (28).

---

(1) Gandon, V.; Leca, D.; Aechtner, T.; Vollhardt, K. P. C.; Malacria, M.; Aubert, C. *Org. Lett.* **2004**, 6, 3405-3407.

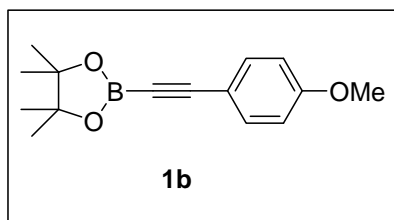

**2-[(4-Methoxyphenyl)ethynyl]-4,4,5,5-tetramethyl-1,3,2-dioxaborolane (1b).** White solid. Yield: 89% (2.29 g, 8.88 mmol). Bp. 190 °C/2 Torr. Mp. 72-74 °C. FT-IR (neat,  $\text{cm}^{-1}$ ): 2976 (m), 2184 ( $\nu(\text{C}\equiv\text{C})$ , w), 1383 (m), 1249 (s), 1140 (m), 845 (s).  $^1\text{H}$  NMR ( $\text{CDCl}_3$ , 300 MHz, rt)  $\delta$  1.31 (s, 12H), 3.80 (s, 3H), 6.82 (d,  $J = 9.9$ , 2H), 7.47 (d,  $J = 9.9$ , 2H);  $^{13}\text{C}\{^1\text{H}\}$  NMR ( $\text{CDCl}_3$ , 75 MHz, rt):  $\delta$  24.6, 55.2, 84.3, 102.1, 113.8, 113.9, 134.2, 160.4. The carbon signal attached to B was not observed due to low intensity;  $^{11}\text{B}$  NMR ( $\text{CDCl}_3$ , 96 MHz, rt)  $\delta$  23.94. MS (EI,  $m/z$  (relative intensity)): 258 ( $\text{M}^+$ , 80), 243 (18), 199 (14), 173 (83), 158 (100), 143 (13), 128 (12), 115 (28), 89 (10), 85 (12). HRMS Calcd for  $\text{C}_{15}\text{H}_{19}\text{BO}_3$ : 258.1427. Found:  $\text{M}^+$ , 258.1422.

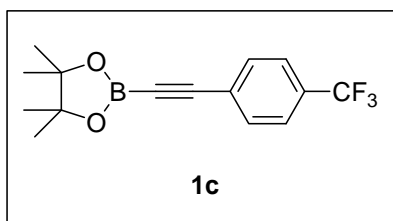

**2-[(4-Trifluoromethylphenyl)ethynyl]-4,4,5,5-tetramethyl-1,3,2-dioxaborolane (1c).** White solid. Yield: 66% (1.96 g, 6.63 mmol). Bp. 150 °C/2 Torr. Mp. 113-114 °C. FT-IR (neat,  $\text{cm}^{-1}$ ): 2988 (m), 2199 ( $\nu(\text{C}\equiv\text{C})$ , w), 1382 (m), 1376 (m), 1138 (m), 841 (s).  $^1\text{H}$  NMR ( $\text{CDCl}_3$ , 300 MHz, rt)  $\delta$  1.33 (s, 12H), 7.58 (d,  $J = 8.4$ , 2H), 7.63 (d,  $J = 8.4$ , 2H);  $^{13}\text{C}\{^1\text{H}\}$  NMR ( $\text{CDCl}_3$ , 75 MHz, rt):  $\delta$  24.6, 84.7, 99.8, 123.7 (q,  $J = 270.6$  Hz), 125.2 (q,  $J = 3.7$  Hz), 125.6, 131.0 (q,  $J = 32.5$  Hz), 132.6. The carbon signal attached to B was not observed due to low intensity;  $^{11}\text{B}$  NMR ( $\text{CDCl}_3$ , 96 MHz, rt)  $\delta$  23.89;  $^{19}\text{F}$  NMR ( $\text{CDCl}_3$ , 282 MHz, rt) -63.52. MS (EI,  $m/z$  (relative intensity)): 296 ( $\text{M}^+$ , 28), 281 (39), 238 (23), 211 (56), 197 (100), 177 (25), 169 (27), 141 (13), 124 (27), 85 (29). Anal. Calcd for  $\text{C}_{15}\text{H}_{16}\text{F}_3\text{BO}_2$ : C, 60.85; H, 5.45%. Found: C, 60.65; H, 5.43%.

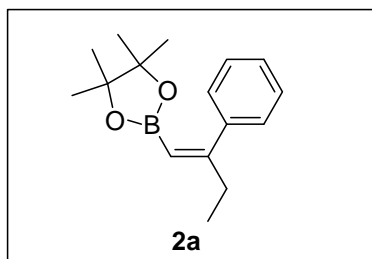

**General Procedure for Zirconocene-Mediated Regio- and Stereoselective Ethylation of 1a-1c:**

**Formation of (Z)-4,4,5,5-Tetramethyl-2-(2-phenyl-1-buten-1-yl)-1,3,2-dioxaborolane (2a).** To a solution zirconocene dichloride (7.02 g, 24 mmol) in THF (120 mL) in a 300 mL of two-necked flask under an Ar atmosphere were added dropwise n-BuLi (30 mL, 48 mmol, 1.6 M hexane solution) at -78 °C. After the reaction mixture was stirred for 1 h at -78 °C, atmospheric ethylene gas was introduced into the vessel for 1 h at -78 °C. The reaction mixture was warmed to room temperature and 4,4,5,5-tetramethyl-2-(phenylethynyl)-1,3,2-dioxaborolane (**1a**) was added. The mixture was stirred for 1 h, quenched with 1 M hydrochloric acid (50 mL), and extracted with diethyl ether (25 mL x 2). The combined ethereal layer was washed with brine and dried over MgSO<sub>4</sub>. Filtration and evaporation afforded yellow oil. Bulb to bulb distillation (150 °C/2 Torr) gave **3a** (4.21 g, 16.3 mmol, 80% yield) as pale yellow oil. FT-IR (neat, cm<sup>-1</sup>): 2933 (m), 1628 (w), 1461 (m), 1379 (m), 1371 (m), 1146 (m), 740 (s), 698 (s). <sup>1</sup>H NMR (CDCl<sub>3</sub>, 300 MHz, rt):  $\delta$  1.04 (t, *J* = 7.4 Hz, 3H), 1.12 (s, 12H), 2.49 (q, *J* = 7.4 Hz, 2H), 5.45 (s, 1H), 7.24-7.28 (m, 5H); <sup>13</sup>C{<sup>1</sup>H} NMR (CDCl<sub>3</sub>, 75 MHz, rt):  $\delta$  12.5, 24.5, 24.8, 33.3, 82.9, 127.1, 127.5, 127.8, 143.1, 163.6; <sup>11</sup>B NMR (CDCl<sub>3</sub>, 96 MHz, rt)  $\delta$  30.02. MS (EI, *m/z* (relative intensity)): 258 (M<sup>+</sup>, 51), 201 (39), 172 (17), 158 (69), 143 (100), 129 (25), 117 (24), 115 (16), 105 (51), 101 (24). Anal. Calcd for C<sub>16</sub>H<sub>23</sub>BO<sub>2</sub>: C, 74.44; H, 8.98%. Found: C, 74.11; H, 8.98%.

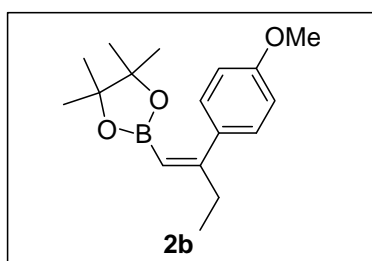

**(Z)-4,4,5,5-Tetramethyl-2-[2-(4-methoxyphenyl)-1-buten-1-yl]-1,3,2-dioxaborolane (2b).** Yellow solid, Yield: 72% (4.15 g, 14.4 mmol). Bp. 180 °C/2 Torr. Mp. 42-43 °C. FT-IR (CHCl<sub>3</sub>, cm<sup>-1</sup>): 2979 (m), 2935 (m), 2837 (m), 1622 (w), 1381 (m), 1372 (m), 1246 (s), 1109 (m), 835 (s). <sup>1</sup>H NMR (CDCl<sub>3</sub>, 300 MHz, rt)  $\delta$

1.03 (t,  $J = 7.2$  Hz, 3H), 1.11 (s, 12H), 2.47 (q,  $J = 7.4$  Hz, 2H), 3.81 (s, 3H), 5.38 (s, 1H), 6.81 (d,  $J = 8.7$  Hz, 2H), 7.20 (d,  $J = 9.0$  Hz, 2H);  $^{13}\text{C}$  NMR ( $\text{CDCl}_3$ , 75 MHz, rt)  $\delta$  12.7, 24.6, 24.8, 33.3, 55.2, 82.9, 112.9, 129.0, 135.4, 159.0, 163.2;  $^{11}\text{B}$  NMR ( $\text{CDCl}_3$ , 96 MHz, rt)  $\delta$  30.18;  $^{19}\text{F}$  NMR ( $\text{CDCl}_3$ , 282 MHz, rt)  $\delta$  -62.9. MS (EI,  $m/z$  (relative intensity)): 288 ( $\text{M}^+$ , 55), 231 (11), 188 (18), 172 (100), 160 (10), 147 (15), 135 (22), 129 (7), 101 (11), 83 (6). Anal. Calcd for  $\text{C}_{17}\text{H}_{25}\text{BO}_3$ : C, 70.85; H, 8.74%. Found: C, 70.65; H, 8.78%.

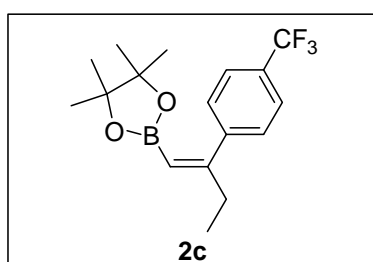

**(Z)-4,4,5,5-Tetramethyl-2-[2-(4-trifluoromethylphenyl)-1-buten-1-yl]-1,3,2-dioxaborolane (2c).** Pale yellow oil. Yield: 68% (4.44 g, 13.6 mmol). Bp. 140 °C/2 Torr. FT-IR (neat,  $\text{cm}^{-1}$ ): 2978 (m), 2935 (m), 1631 (w), 1380 (m), 1371 (m), 1126 (m).  $^1\text{H}$  NMR ( $\text{CDCl}_3$ , 300 MHz, rt)  $\delta$  1.04 (t,  $J = 7.4$  Hz, 3H), 1.10 (s, 12H), 2.47 (q,  $J = 7.4$  Hz, 2H), 5.53 (s, 1H), 7.32 (d,  $J = 8.1$  Hz, 2H), 7.54 (d,  $J = 8.1$  Hz, 2H);  $^{13}\text{C}$  NMR ( $\text{CDCl}_3$ , 75 MHz, rt)  $\delta$  12.3, 24.5, 33.4, 83.1, 124.3 (q,  $J = 270.4$  Hz), 124.4 (q,  $J = 3.8$  Hz), 128.2, 129.2, (q,  $J = 32.0$  Hz), 143.8, 146.9, 162.6;  $^{11}\text{B}$  NMR ( $\text{CDCl}_3$ , 96 MHz, rt)  $\delta$  29.81;  $^{19}\text{F}$  NMR ( $\text{CDCl}_3$ , 282 MHz, rt)  $\delta$  -62.89. MS (EI,  $m/z$  (relative intensity)): 326 ( $\text{M}^+$ , 49), 311 (22), 269 (20), 240 (47), 226 (35), 211 (100), 207 (50), 173 (22), 101 (45), 85 (19). Anal. Calcd for  $\text{C}_{17}\text{H}_{22}\text{BF}_3\text{O}_2$ : C, 62.60; H, 6.80%. Found: C, 62.59; H, 6.81%.

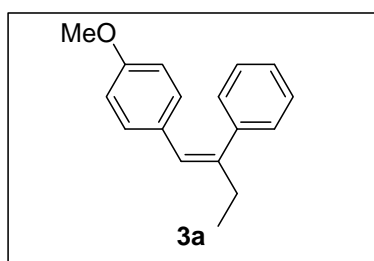

**General Procedure for Suzuki-Miyaura Cross-Coupling Reaction of 2a-2c with Aryl Iodides: Formation of (Z)-1-(4-Methoxyphenyl)-2-phenyl-1-butene (3a).** To a solution of bis(dibenzylidene)palladium ( $\text{Pd}(\text{dba})_2$ ) (115 mg, 0.20 mmol, 10 mol %),  $\text{P}^t\text{Bu}_3$  (4 mL, 0.1 M hexane solution,

0.40 mmol, 20 mol %), and (Z)-4,4,5,5-tetramethyl-2-(2-phenyl-1-buten-1-yl)-1,3,2-dioxaborolane (**2a**) (516 mg, 2.0 mmol) in THF (20 mL) in a 50 mL of Schlenk tube under an Ar atmosphere were added 4-iodoanisole (515 mg, 2.2 mmol) and KOH aqueous solution (2 mL, 3.0 M solution, 6.0 mmol) at room temperature. The reaction mixture was stirred for 12 h at room temperature, quenched with ammonium chloride, and extracted with diethyl ether (25 mL x 2). The combined ethereal layer was washed with NaHCO<sub>3</sub> aq., brine and dried over MgSO<sub>4</sub>. Filtration and evaporation afforded a brown oil. Bulb to bulb distillation (190 °C/2 Torr) gave **3a** (448 mg, 1.62 mmol, 81% yield) as a colorless liquid. *R<sub>f</sub>* = 0.40 (hexane). FT-IR (neat, cm<sup>-1</sup>): 2964 (m), 2933 (m), 1608 (w), 1251 (s), 826 (s), 701 (s). <sup>1</sup>H NMR (CDCl<sub>3</sub>, 300 MHz, rt) δ 1.09 (t, *J* = 7.2 Hz, 3H), 2.52 (q, *J* = 7.2 Hz, 2H), 3.74 (s, 3H), 6.40 (s, 1H), 6.66 (d, *J* = 8.1 Hz, 2H), 6.88 (d, *J* = 8.1 Hz, 2H), 7.18-7.37 (m, 5H); <sup>13</sup>C NMR (CDCl<sub>3</sub>, 75 MHz, rt) δ 12.9, 33.3, 55.0, 113.1, 124.4, 126.6, 128.5, 128.6, 130.0, 130.1, 141.7, 143.0, 157.8. MS (EI, *m/z* (relative intensity)): 238 (*M*<sup>+</sup>, 100), 223 (57), 208 (10), 178 (12), 165 (19), 145 (21), 129 (10), 121 (19), 115 (43), 91 (18). Anal. Calcd for C<sub>17</sub>H<sub>18</sub>O<sub>2</sub>: C, 85.67; H, 7.61%. Found: C, 85.60; H, 7.61%.

Preparation of **3b-3q** were carried out analogously to **3a**.

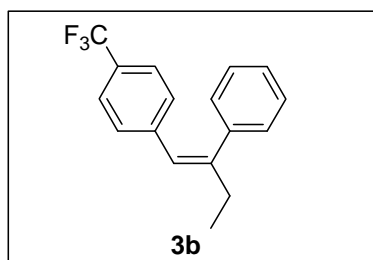

(*Z*)-1-(4-Trifluoromethylphenyl)-2-phenyl-1-butene (**3b**). Colorless liquid. Isolated yield was 83% (459 mg, 1.66 mmol). Bp. 150 °C/2 Torr. *R<sub>f</sub>* = 0.50 (hexane). FT-IR (neat, cm<sup>-1</sup>): 2970 (m), 2934 (m), 1615 (w), 1123 (m), 759 (s), 701 (s). <sup>1</sup>H NMR (CDCl<sub>3</sub>, 300 MHz, rt) δ 1.10 (t, *J* = 7.4 Hz, 3H), 2.55 (q, *J* = 7.3 Hz, 2H), 6.45 (s, 1H), 7.01 (d, *J* = 8.1 Hz, 2H), 7.09 (d, *J* = 8.1 Hz, 2H), 7.28-7.36 (m, 5H); <sup>13</sup>C NMR (CDCl<sub>3</sub>, 75 MHz, rt) δ 12.7, 33.6, 123.8, 124.2 (q, *J* = 270.0 Hz), 124.7 (q, *J* = 3.8 Hz), 127.2, 127.8 (q, *J* = 31.9 Hz), 128.3, 128.6, 129.0, 140.8, 141.2, 147.7; <sup>19</sup>F NMR (CDCl<sub>3</sub>, 282 MHz, rt) -62.95. MS (EI, *m/z* (relative intensity)): 276 (*M*<sup>+</sup>, 100), 261 (38), 247 (30), 207 (17), 183 (30), 178 (20), 129 (29), 117 (51), 115 (57), 91 (43). Anal. Calcd for C<sub>17</sub>H<sub>15</sub>F<sub>3</sub>: C, 73.90; H, 5.47%. Found: C, 73.93; H, 5.55%.

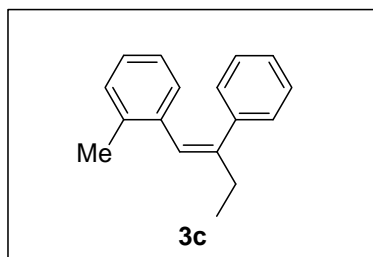

**(Z)-1-(2-Methylphenyl)-2-phenyl-1-butene (3c).**<sup>2</sup> Colorless liquid. Isolated yield was 83% (369 mg, 1.66 mmol). Bp. 180 °C/2 Torr.  $R_f$  = 0.70 (hexane). FT-IR (neat,  $\text{cm}^{-1}$ ): 2966 (m), 2932 (m), 1600 (w), 1459 (m), 732 (s), 698 (s).  $^1\text{H}$  NMR ( $\text{CDCl}_3$ , 300 MHz, rt)  $\delta$  1.14 (t,  $J$  = 7.4 Hz, 3H), 2.33 (s, 3H), 2.61 (q,  $J$  = 7.4 Hz, 2H), 6.53 (s, 1H), 6.76 (d,  $J$  = 7.4 Hz, 1H), 6.86 (t,  $J$  = 7.2 Hz, 1H), 7.01-7.22 (m, 7H);  $^{13}\text{C}$  NMR ( $\text{CDCl}_3$ , 75 MHz, rt)  $\delta$  13.3, 20.0, 32.4, 124.1, 125.1, 126.1, 126.5, 127.9, 128.7, 129.5, 129.8, 136.2, 137.2, 141.0, 144.8. MS (EI,  $m/z$  (relative intensity)): 222 ( $\text{M}^+$ , 100), 207 (33), 193 (48), 179 (28), 165 (16), 129 (44), 117 (10), 115 (50), 105 (10), 91 (27).

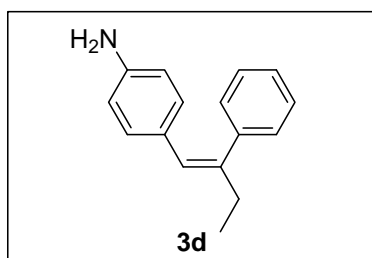

**(Z)-1-(4-Aminophenyl)-2-phenyl-1-butene (3d).** Colorless liquid. Isolated yield was 80% (357 mg, 1.60 mmol). Bp. 180 °C/2 Torr.  $R_f$  = 0.10 (hexane/ethyl acetate = 10/1). FT-IR ( $\text{CHCl}_3$ ,  $\text{cm}^{-1}$ ): 3458 (m), 3376 (m), 2964 (m), 2930 (m), 1620 (m), 826 (m), 763 (s), 701 (s).  $^1\text{H}$  NMR ( $\text{CDCl}_3$ , 300 MHz, rt)  $\delta$  1.05 (t,  $J$  = 7.2 Hz, 3H), 2.47 (q,  $J$  = 7.2 Hz, 2H), 3.56 (s, 2H), 6.32 (s, 1H), 6.48 (d,  $J$  = 8.7 Hz, 2H), 6.74 (d,  $J$  = 8.7 Hz, 2H), 7.16 (d,  $J$  = 8.1 Hz, 2H), 7.24-7.33 (m, 3H);  $^{13}\text{C}$  NMR ( $\text{CDCl}_3$ , 75 MHz, rt)  $\delta$  13.0, 33.5, 114.8, 124.7, 124.7, 126.5, 128.4, 128.6, 129.9, 141.86, 141.94, 143.8. MS (EI,  $m/z$  (relative intensity)): 223 ( $\text{M}^+$ , 100), 208 (66), 193 (22), 165 (13), 130 (43), 115 (69), 106 (55), 96 (12), 91 (41), 77 (17). Anal. Calcd for  $\text{C}_{16}\text{H}_{17}\text{N}$ : C, 86.05; H, 7.67; N, 6.27%. Found: C, 85.69; H, 7.74; N, 6.15%.

---

(2) James, B. G.; Pattenden, G. *J. Chem. Soc., Perkin Trans. I*, **1974**, 1204-1208.

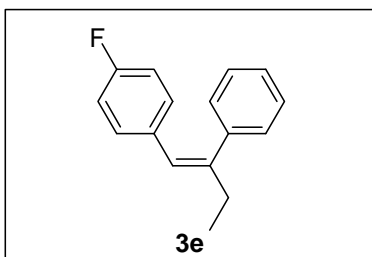

**(Z)-1-(4-Fluorophenyl)-2-phenyl-1-butene (3e).** Colorless liquid. Isolated yield was 55% (249 mg, 1.10 mmol). Bp. 140 °C/2 Torr.  $R_f$  = 0.40 (hexane). FT-IR (neat,  $\text{cm}^{-1}$ ): 2968 (m), 2933 (m), 1602 (m), 1229 (s), 828 (m), 762 (s), 700 (s).  $^1\text{H}$  NMR ( $\text{CDCl}_3$ , 300 MHz, rt)  $\delta$  1.09 (t,  $J$  = 7.5 Hz, 3H), 2.52 (q,  $J$  = 7.5 Hz, 2H), 6.41 (s, 1H), 6.78 (t,  $J$  = 7.5 Hz, 2H), 6.90 (t,  $J$  = 8.1 Hz, 2H), 7.15 (d,  $J$  = 7.8, 2H), 7.26-7.35 (m, 3H);  $^{13}\text{C}$  NMR ( $\text{CDCl}_3$ , 75 MHz, rt)  $\delta$  12.8, 33.4, 114.6 (d,  $J$  = 21.0 Hz), 123.9, 127.0, 128.5 (d,  $J$  = 4.0 Hz), 130.4 (d,  $J$  = 7.7 Hz), 133.6 (d,  $J$  = 3.4 Hz), 141.2, 144.8, 159.5, 162.7;  $^{19}\text{F}$  NMR ( $\text{CDCl}_3$ , 282 MHz, rt) -116.75. MS (EI,  $m/z$  (relative intensity)): 226 ( $\text{M}^+$ , 100), 210 (58), 196 (41), 183 (12), 133 (62), 117 (36), 115 (83), 109 (31), 98 (12), 91 (41). Anal. Calcd for  $\text{C}_{16}\text{H}_{15}\text{F}$ : C, 84.92; H, 6.68%. Found: C, 84.95; H, 6.78%.

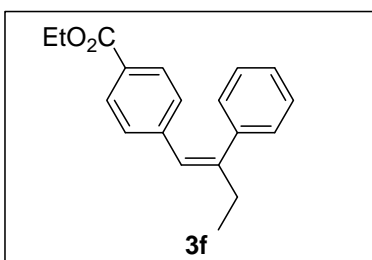

**(Z)-1-(4-Ethoxycarbonylphenyl)-2-phenyl-1-butene (3f).** Colorless liquid. Isolated yield was 82% (473 mg, 1.64 mmol). Bp. 200 °C/2 Torr.  $R_f$  = 0.10 (hexane). FT-IR (neat,  $\text{cm}^{-1}$ ): 2969 (m), 2934 (m), 1717 (s), 1606 (w), 1367 (m), 701 (s).  $^1\text{H}$  NMR ( $\text{CDCl}_3$ , 300 MHz, rt)  $\delta$  1.09 (t,  $J$  = 7.3 Hz, 3H), 1.34 (t,  $J$  = 7.2 Hz, 3H), 2.54 (q,  $J$  = 7.4 Hz, 2H), 4.31 (q,  $J$  = 7.2 Hz, 2H), 6.46 (s, 1H), 6.97 (d,  $J$  = 8.1 Hz, 2H), 7.11-7.15 (m, 2H), 7.26-7.31 (m, 3H), 7.61 (d,  $J$  = 8.7 Hz, 2H);  $^{13}\text{C}$  NMR ( $\text{CDCl}_3$ , 75 MHz, rt)  $\delta$  12.7, 14.3, 33.6, 60.7, 124.4, 127.1, 127.8, 128.3, 128.6, 128.8, 129.1, 141.0, 142.3, 147.6, 166.5. MS (EI,  $m/z$  (relative intensity)): 280 ( $\text{M}^+$ , 100), 235 (19), 207 (36), 191 (18), 179 (35), 165 (16), 129 (35), 117 (13), 115 (32), 91 (22). Anal. Calcd for  $\text{C}_{19}\text{H}_{20}\text{O}_2$ : C, 81.40; H, 7.19%. Found: C, 81.26; H, 7.19%.

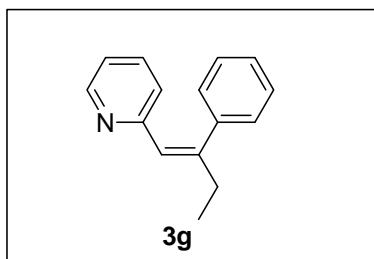

**(Z)-1-(2-Pyridyl)-2-phenyl-1-butene (3g).** Colorless liquid. Isolated yield was 79% (331 mg, 1.58 mmol). Bp. 140 °C/2 Torr.  $R_f$  = 0.10 (hexane/ethyl acetate = 10/1). FT-IR (neat,  $\text{cm}^{-1}$ ): 2967 (m), 2932 (m), 1636 (w), 1585 (m), 772 (s), 701 (s).  $^1\text{H}$  NMR ( $\text{CDCl}_3$ , 300 MHz, rt)  $\delta$  1.10 (t,  $J$  = 7.5 Hz, 3H), 2.55 (q,  $J$  = 7.2 Hz, 2H), 6.58 (d,  $J$  = 8.1 Hz, 1H), 6.63 (s, 1H), 6.94 (t,  $J$  = 6.9 Hz, 1H), 7.12-7.15 (m, 2H), 7.20-7.32 (m, 4H), 8.48 (d,  $J$  = 7.8 Hz, 1H);  $^{13}\text{C}$  NMR ( $\text{CDCl}_3$ , 75 MHz, rt)  $\delta$  12.5, 33.4, 120.8, 123.5, 125.8, 127.2, 128.1, 128.6, 135.4, 140.9, 148.6, 149.2, 156.5. MS (EI,  $m/z$  (relative intensity)): 209 ( $\text{M}^+$ , 35), 208 (100), 193 (27), 180 (17), 117 (10), 115 (8), 93 (13), 90 (14), 84 (10), 78 (16). HRMS Calcd for  $\text{C}_{15}\text{H}_{15}\text{N}$ : 209.1204. Found:  $\text{M}^+$ , 209.1216.

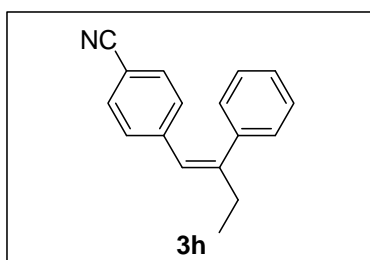

**(Z)-1-(4-Cyanophenyl)-2-phenyl-1-butene (3h).** Colorless liquid. Isolated yield was 86% (401 mg, 1.72 mmol). Bp. 170 °C/2 Torr.  $R_f$  = 0.10 (hexane). FT-IR ( $\text{CHCl}_3$ ,  $\text{cm}^{-1}$ ): 2968 (m), 2933 (m), 2224 (s,  $\nu_{\text{CN}}$ ), 1603 (m), 828 (m), 773 (s), 701 (s).  $^1\text{H}$  NMR ( $\text{CDCl}_3$ , 300 MHz, rt)  $\delta$  1.08 (t,  $J$  = 7.5 Hz, 3H), 2.54 (q,  $J$  = 7.5 Hz, 2H), 6.42 (s, 1H), 6.98 (d,  $J$  = 8.4 Hz, 2H), 7.09-7.13 (m, 2H), 7.28-7.36 (m, 5H);  $^{13}\text{C}$  NMR ( $\text{CDCl}_3$ , 75 MHz, rt)  $\delta$  12.6, 33.6, 109.1, 119.1, 123.6, 127.4, 128.1, 128.7, 129.4, 131.5, 140.4, 142.4, 149.1. MS (EI,  $m/z$  (relative intensity)): 233 ( $\text{M}^+$ , 100), 218 (63), 204 (48), 190 (11), 155 (16), 140 (40), 117 (43), 115 (45), 91 (27), 77 (12). Anal. Calcd for  $\text{C}_{15}\text{H}_{17}\text{N}$ : C, 87.52; H, 6.48; N, 6.00%. Found: C, 87.24; H, 6.57; N, 5.93%.

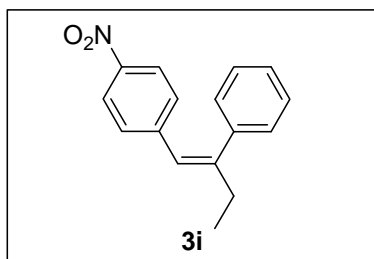

**(Z)-1-(4-Nitrophenyl)-2-phenyl-1-butene (3i).** Yellow solid. Isolated yield was 92% (411 mg, 1.84 mmol). Bp. 180 °C/2 Torr.  $R_f$  = 0.15 (hexane). Mp. 30-32 °C. FT-IR (CHCl<sub>3</sub>, cm<sup>-1</sup>): 2970 (m), 2934 (m), 1593 (s), 1517 (s), 1341 (s), 830 (w), 753 (s), 702 (s). <sup>1</sup>H NMR (CDCl<sub>3</sub>, 300 MHz, rt)  $\delta$  1.10 (t,  $J$  = 7.2 Hz, 3H), 2.56 (q,  $J$  = 7.5 Hz, 2H), 6.48 (s, 1H), 7.03 (d,  $J$  = 9.0 Hz, 2H), 7.12 (d,  $J$  = 7.8 Hz, 2H), 7.29-7.35 (m, 3H), 7.93 (d,  $J$  = 9.0 Hz, 2H); <sup>13</sup>C NMR (CDCl<sub>3</sub>, 75 MHz, rt)  $\delta$  12.6, 33.6, 123.1, 123.3, 127.6, 128.1, 128.8, 129.4, 140.3, 144.5, 145.6, 150.0. MS (EI, m/z (relative intensity)): 253 (M<sup>+</sup>, 100), 238 (17), 223 (14), 207 (28), 192 (41), 178 (37), 93 (46), 165 (22), 152 (11), 129 (10), 115 (31), 91 (25). HRMS Calcd for C<sub>16</sub>H<sub>15</sub>NO<sub>2</sub>: 253.1103. Found: M<sup>+</sup>, 253.1101.

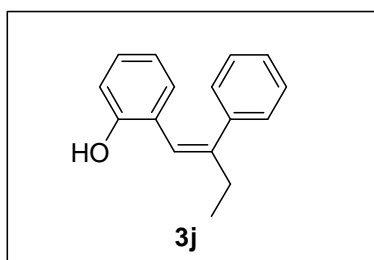

**(Z)-1-(2-Hydroxyphenyl)-2-phenyl-1-butene (3j).**<sup>3</sup> White solid. Isolated yield was 58% (260 mg, 1.16 mmol). Bp. 150 °C/2 Torr.  $R_f$  = 0.20 (hexane/ethyl acetate = 10/1). Mp. 41-43 °C. FT-IR (CHCl<sub>3</sub>, cm<sup>-1</sup>): 3545 (w), 3420 (w), 2969 (m), 2934 (m), 754 (s), 668 (s). <sup>1</sup>H NMR (CDCl<sub>3</sub>, 300 MHz, rt)  $\delta$  1.15 (t,  $J$  = 7.5 Hz, 3H), 2.66 (q,  $J$  = 7.5 Hz, 2H), 5.04 (s, 1H), 6.53 (s, 1H), 6.74 (t,  $J$  = 7.5 Hz, 2H), 6.95 (d,  $J$  = 7.5 Hz, 1H), 7.06 (d,  $J$  = 7.5 Hz, 1H), 7.17-7.30 (m, 5H); <sup>13</sup>C NMR (CDCl<sub>3</sub>, 75 MHz, rt)  $\delta$  13.1, 32.2, 115.4, 119.6, 120.2, 124.3, 127.4, 128.0, 128.2, 128.4, 130.4, 139.9, 147.2, 152.5. MS (EI, m/z (relative intensity)): 224 (M<sup>+</sup>, 47), 195 (100), 178 (9), 167 (59), 152 (15), 131 (13), 115 (32), 105 (14), 91 (23), 77 (17). Anal. Calcd for C<sub>16</sub>H<sub>16</sub>O: C, 85.68; H, 7.19%. Found: C, 85.36; H, 7.34%.

(3) Nishimae, S.; Inoue, R.; Shinokubo, H.; Oshima, K. *Chem. Lett.* **1998**, 785-786.

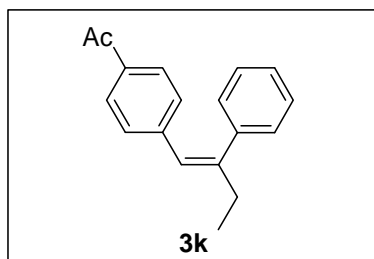

**(Z)-1-(4-Acetylphenyl)-2-phenyl-1-butene (3k).** Yellow liquid. Isolated yield was 56% (280 mg, 1.12 mmol). Bp. 190 °C/2 Torr.  $R_f$  = 0.10 (hexane). FT-IR (neat,  $\text{cm}^{-1}$ ): 2971 (m), 2935 (m), 1684 (s), 1601 (w), 1268 (m), 872 (m), 826 (s), 764 (s), 701 (s).  $^1\text{H}$  NMR ( $\text{CDCl}_3$ , 300 MHz, rt)  $\delta$  1.09 (t,  $J$  = 7.2 Hz, 3H), 2.50 (s, 3H), 2.54 (q,  $J$  = 7.5 Hz, 2H), 6.46 (s, 1H), 6.84 (d,  $J$  = 8.4 Hz, 2H), 7.12-7.15 (m, 2H), 7.29-7.32 (m, 3H), 7.68 (d,  $J$  = 8.4 Hz, 2H);  $^{13}\text{C}$  NMR ( $\text{CDCl}_3$ , 75 MHz, rt)  $\delta$  12.7, 26.4, 33.6, 124.2, 127.2, 127.9, 128.3, 128.6, 128.9, 134.5, 140.9, 142.6, 148.0, 197.6. MS (EI,  $m/z$  (relative intensity)): 250 ( $\text{M}^+$ , 100), 235 (68), 207 (14), 191 (13), 178 (29), 165 (18), 129 (25), 115 (18), 110 (11), 91 (20). Anal. Calcd for  $\text{C}_{18}\text{H}_{18}\text{O}$ : C, 86.36; H, 7.25%. Found: C, 86.06; H, 7.23%.

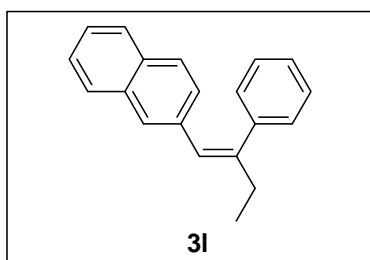

**(Z)-1-(1-Naphthyl)-2-phenyl-1-butene (3l).** Colorless liquid. Isolated yield was 94% (486 mg, 1.88 mmol). Bp. 195 °C/2 Torr.  $R_f$  = 0.40 (hexane). FT-IR (neat,  $\text{cm}^{-1}$ ): 2965 (m), 2931 (m), 1636 (w), 800 (s), 779 (s), 773 (s), 699 (s).  $^1\text{H}$  NMR ( $\text{CDCl}_3$ , 300 MHz, rt)  $\delta$  1.26 (t,  $J$  = 7.2 Hz, 3H), 2.75 (q,  $J$  = 7.5 Hz, 2H), 6.98-7.03 (m, 2H), 7.09-7.21 (m, 6H), 7.49-7.56 (m, 2H), 7.65 (d,  $J$  = 8.1 Hz, 1H), 7.86 (d,  $J$  = 7.2 Hz, 1H), 8.21 (d,  $J$  = 7.5 Hz, 1H);  $^{13}\text{C}$  NMR ( $\text{CDCl}_3$ , 75 MHz, rt)  $\delta$  13.3, 32.4, 123.2, 124.7, 125.3, 125.5, 125.7, 126.5, 126.5, 127.7, 127.9, 128.4, 128.6, 132.3, 133.4, 135.3, 140.9, 146.5. MS (EI,  $m/z$  (relative intensity)): 258 ( $\text{M}^+$ , 90), 243 (24), 229 (100), 215 (9), 202 (7), 165 (44), 152 (10), 141 (12), 115 (28), 91 (34). Anal. Calcd for  $\text{C}_{18}\text{H}_{20}$ : C, 92.98; H, 7.02%. Found: C, 92.88; H, 7.08%.

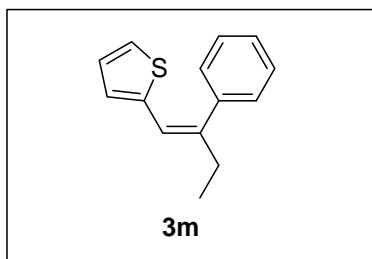

**(Z)-1-(2-Thienyl)-2-phenyl-1-butene (3m).** Colorless liquid. Isolated yield was 85% (364 mg, 1.70 mmol). Bp. 170 °C/2 Torr.  $R_f$  = 0.20 (hexane). FT-IR (neat,  $\text{cm}^{-1}$ ): 3050 (m), 2966 (m), 2931 (m), 740 (s), 699 (s).  $^1\text{H}$  NMR ( $\text{CDCl}_3$ , 300 MHz, rt)  $\delta$  1.11 (t,  $J$  = 7.2 Hz, 3H), 2.48 (q,  $J$  = 7.4 Hz, 2H), 6.63 (s, 1H), 6.76 (d,  $J$  = 3.5 Hz, 1H), 6.81-6.84 (m, 1H), 6.96 (d,  $J$  = 3.5 Hz, 1H), 7.21-7.25 (m, 2H), 7.38-7.47 (m, 3H);  $^{13}\text{C}$  NMR ( $\text{CDCl}_3$ , 75 MHz, rt)  $\delta$  12.7, 33.6, 118.7, 124.7, 125.9, 126.8, 127.4, 128.7, 128.9, 141.1, 141.1, 143.6. MS (EI,  $m/z$  (relative intensity)): 214 ( $\text{M}^+$ , 100), 199 (48), 185 (20), 165 (41), 152 (11), 129 (8), 115 (61), 97 (22), 91 (16), 77 (9). Anal. Calcd for  $\text{C}_{14}\text{H}_{14}\text{S}$ : C, 78.46; H, 6.58%. Found: C, 78.40; H, 6.61%.

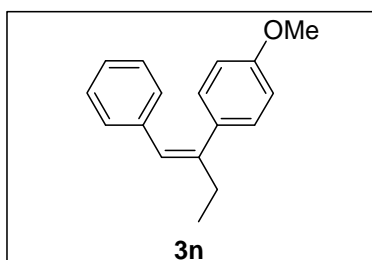

**(Z)-1-Phenyl-2-(4-methoxyphenyl)-1-butene (3n).** Colorless liquid. Isolated yield was 85% (405 mg, 1.70 mmol). Bp. 180 °C/2 Torr.  $R_f$  = 0.40 (hexane). FT-IR (neat,  $\text{cm}^{-1}$ ): 2964 (m), 2933 (m), 1607 (w), 1245 (m), 832 (s).  $^1\text{H}$  NMR ( $\text{CDCl}_3$ , 300 MHz, rt)  $\delta$  1.09 (t,  $J$  = 7.2 Hz, 3H), 2.52 (q,  $J$  = 7.2 Hz, 2H), 3.83 (s, 3H), 6.43 (s, 1H), 6.83-6.87 (m, 2H), 6.88-7.00 (m, 2H), 6.88-7.13 (m, 5H);  $^{13}\text{C}$  NMR ( $\text{CDCl}_3$ , 75 MHz, rt)  $\delta$  12.9, 33.5, 55.1, 113.8, 124.8, 125.9, 127.8, 128.9, 129.6, 133.5, 137.8, 144.4, 158.4. MS (EI,  $m/z$  (relative intensity)): 238 ( $\text{M}^+$ , 100), 223 (18), 209 (23), 194 (11), 178 (13), 165 (24), 147 (20), 129 (13), 115 (33), 91 (20). Anal. Calcd for  $\text{C}_{17}\text{H}_{18}\text{O}$ : C, 85.67; H, 7.61%. Found: C, 85.44; H, 7.73%.

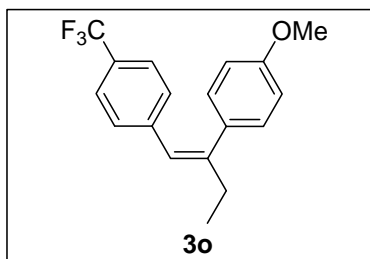

**(Z)-1-(4-Trifluoromethylphenyl)-2-(4-methoxyphenyl)-1-butene (3o).** Colorless liquid. Isolated yield was 72% (441 mg, 1.44 mmol). Bp. 170 °C/2 Torr.  $R_f$  = 0.20 (hexane). FT-IR (neat,  $\text{cm}^{-1}$ ): 2968 (m), 2936 (m), 1609 (w), 1246 (m), 1124 (m), 833 (s).  $^1\text{H}$  NMR ( $\text{CDCl}_3$ , 300 MHz, rt)  $\delta$  1.08 (t,  $J$  = 7.4 Hz, 3H), 2.52 (q,  $J$  = 7.2 Hz, 2H), 3.82 (s, 3H), 6.42 (s, 1H), 6.84-6.88 (m, 2H), 7.03-7.08 (m, 4H), 7.35 (d,  $J$  = 7.4 Hz, 2H);  $^{13}\text{C}$  NMR ( $\text{CDCl}_3$ , 75 MHz, rt)  $\delta$  12.8, 33.5, 55.1, 114.0, 123.5, 124.3 (q,  $J$  = 270.1 Hz), 124.7 (q,  $J$  = 3.8 Hz), 127.6 (q,  $J$  = 32.2 Hz), 130.2, 131.8, 132.8, 141.5, 147.2, 158.8;  $^{19}\text{F}$  NMR ( $\text{CDCl}_3$ , 282 MHz, rt) -62.91. MS (EI,  $m/z$  (relative intensity)): 306 ( $\text{M}^+$ , 100), 291 (12), 277 (24), 262 (11), 183 (14), 178 (8), 165 (14), 147 (26), 121 (8), 108 (16), 91 (11). Anal. Calcd for  $\text{C}_{18}\text{H}_{17}\text{F}_3\text{O}$ : C, 70.58; H, 5.59%. Found: C, 70.63; H, 5.59%.

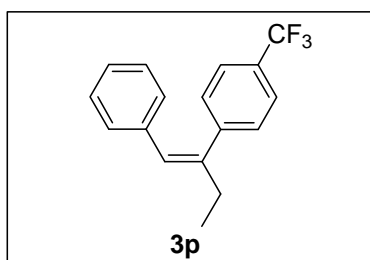

**(Z)-1-Phenyl-2-(4-trifluoromethylphenyl)-1-butene (3p).** Colorless liquid. Isolated yield was 85% (470 mg, 1.70 mmol). Bp. 150 °C/2 Torr.  $R_f$  = 0.50 (hexane). FT-IR (neat,  $\text{cm}^{-1}$ ): 2970 (m), 2935 (m), 1615 (w), 1128 (m), 756 (s), 696 (s).  $^1\text{H}$  NMR ( $\text{CDCl}_3$ , 300 MHz, rt)  $\delta$  1.07 (t,  $J$  = 7.8 Hz, 3H), 2.52 (q,  $J$  = 7.8 Hz, 2H), 6.52 (s, 1H), 6.90-6.91 (m, 2H), 7.09-7.13 (m, 3H), 7.27-7.28 (m, 2H), 7.55 (d,  $J$  = 8.1 Hz, 2H);  $^{13}\text{C}$  NMR ( $\text{CDCl}_3$ , 75 MHz, rt)  $\delta$  12.8, 33.1, 124.3 (q,  $J$  = 270.4 Hz), 125.4 (q,  $J$  = 3.7 Hz), 126.3, 126.4, 128.0, 128.9 (q,  $J$  = 32.0 Hz), 129.0, 129.1, 136.9, 143.3, 145.4;  $^{19}\text{F}$  NMR ( $\text{CDCl}_3$ , 282 MHz, rt) -62.90. MS (EI,  $m/z$  (relative intensity)): 276 ( $\text{M}^+$ , 100), 261 (52), 247 (22), 207 (16), 183 (29), 178 (17), 165 (15), 129 (33), 115 (85), 105 (18), 91 (96). Anal. Calcd for  $\text{C}_{17}\text{H}_{15}\text{F}_3$ : C, 73.90; H, 5.47%. Found: C, 74.06; H, 5.62%.

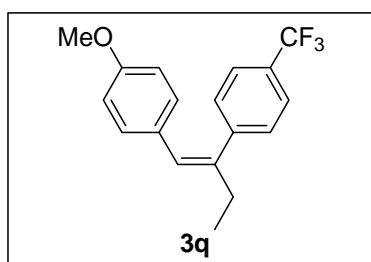

**(Z)-1-(4-Methoxyphenyl)-2-(4-(trifluoromethyl)phenyl)-1-butene (3q).** Colorless liquid. Isolated yield was 75% (459.5 mg, 1.50 mmol). Bp. 170 °C/2 Torr.  $R_f$  = 0.20 (hexane). FT-IR (neat,  $\text{cm}^{-1}$ ): 2967 (m), 2935 (m), 1608 (w), 1253 (m), 1126 (m), 827 (s).  $^1\text{H}$  NMR ( $\text{CDCl}_3$ , 300 MHz, rt)  $\delta$  1.05 (t,  $J$  = 7.8 Hz, 3H), 2.50 (q,  $J$  = 7.8 Hz, 2H), 3.74 (s, 3H), 6.44 (s, 1H), 6.65 (d,  $J$  = 7.8 Hz, 2H), 6.83 (d,  $J$  = 8.4 Hz, 2H), 7.27-7.28 (m, 2H), 7.55 (d,  $J$  = 7.8 Hz, 2H);  $^{13}\text{C}$  NMR ( $\text{CDCl}_3$ , 75 MHz, rt)  $\delta$  12.9, 33.1, 55.1, 113.4, 124.3 (q,  $J$  = 270.3 Hz), 125.4 (q,  $J$  = 3.7 Hz), 126.8, 128.3 (q,  $J$  = 32.5 Hz), 129.1, 129.5, 130.1, 141.4, 145.6, 158.1;  $^{19}\text{F}$  NMR ( $\text{CDCl}_3$ , 282 MHz, rt) -62.86. MS (EI,  $m/z$  (relative intensity)): 306 ( $\text{M}^+$ , 100), 291 (68), 276 (8), 251 (7), 183 (28), 178 (10), 165 (10), 145 (13), 121 (56), 115 (14), 108 (12), 91 (19). Anal. Calcd for  $\text{C}_{18}\text{H}_{17}\text{F}_3\text{O}$ : C, 70.58; H, 5.59%. Found: C, 70.72; H, 5.66%.

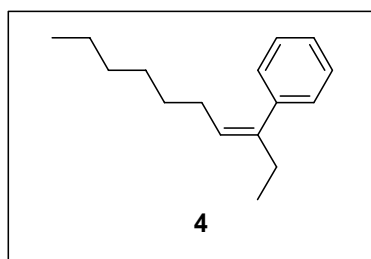

**[(Z)-1-Ethyl-1-octenyl]benzene (4).** Under an Ar atmosphere,  $\text{Ni}(\text{cod})_2$  (22.4 mg, 0.080 mmol), bathophenanthroline (53 mg, 0.16 mmol), (Z)-4,4,5,5-tetramethyl-2-(2-phenyl-1-buten-1-yl)-1,3,2-dioxaborolane (**2a**) (619.6 mg, 2.4 mmol), and  $\text{KO}^t\text{Bu}$  (360 mg, 3.2 mmol) were placed in a 50 mL Schlenk tube equipped with a stirring bar. Then 2-butanol (12 mL) as a solvent was added and the reaction mixture was stirred for 10 minutes at room temperature. To the resulting dark purple mixture, 1-iodohexane (295  $\mu\text{L}$ , 2.0 mmol) was then added by syringe, and the reaction mixture was heated at 60 °C (oil bath) for 5 h. The resulting white suspension was allowed to cool to room temperature, and then it was filtered through a short pad of silica gel. The filtrate was concentrated under vacuum, and the product was isolated by bulb to bulb distillation (120 °C/2 Torr) as a colorless oil. Isolated yield was 44% (190 mg, 0.88 mmol). Bp. 120 °C/2 Torr.

$R_f = 0.60$  (hexane). FT-IR (neat,  $\text{cm}^{-1}$ ): 2960 (m), 2925 (m), 2855 (m), 2360 (m), 2337 (m), 1461 (m), 1456 (m), 767 (s), 700 (s).  $^1\text{H}$  NMR ( $\text{CDCl}_3$ , 300 MHz, rt)  $\delta$  0.86 (t,  $J = 7.2$  Hz, 3H), 0.96 (t,  $J = 7.2$  Hz, 3H), 1.17-1.34 (m, 8H), 1.91 (q,  $J = 7.2$  Hz, 2H), 2.34 (q,  $J = 7.2$  Hz, 2H), 5.43 (t,  $J = 7.5$  Hz, 1H), 7.11-7.15 (m, 2H), 7.20-7.26 (m, 1H), 7.30-7.36 (m, 2H).  $^{13}\text{C}$  NMR ( $\text{CDCl}_3$ , 75 MHz, rt)  $\delta$  13.1, 14.1, 22.6, 28.8, 28.9, 30.1, 31.7, 32.1, 126.1, 126.2, 127.9, 128.4, 141.7, 142.4. MS (EI,  $m/z$  (relative intensity)): 216 ( $\text{M}^+$ , 11), 187 (17), 145 (48), 132 (32), 129 (14), 117 (100), 115 (28), 105 (28), 91 (72), 77 (7). HRMS Calcd for  $\text{C}_{16}\text{H}_{24}$ : 216.1878. Found:  $\text{M}^+$ , 216.1879. Synthesis of (*E*)-isomer has been reported.<sup>4</sup>

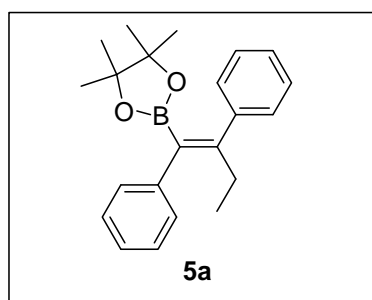

**2-[(1*E*)-1,2-Diphenyl-1-butenyl]-4,4,5,5-tetramethyl-1,3,2-dioxaborolane (5a).** [865999-25-3]<sup>5</sup> To a solution zirconocene dichloride (1.05 g, 3.6 mmol) in THF (18 mL) in a 25 mL of Schlenk tube under an Ar atmosphere were added dropwise *n*-BuLi (4.5 mL, 7.2 mmol, 1.6 M hexane solution) at  $-78$  °C. After the reaction mixture was stirred for 1 h at  $-78$  °C, atmospheric ethylene gas was introduced into the vessel for 1 h at  $-78$  °C. The reaction mixture was warmed to room temperature and 4,4,5,5-tetramethyl-2-(phenylethynyl)-1,3,2-dioxaborolane (**1a**; 682 mg, 3 mmol) was added. After 1 h, *i*PrOH (185  $\mu\text{L}$ , 2.4 mmol) was added and the reaction mixture was stirred for additional 1 h. To the mixture were added  $\text{Pd}(\text{PPh}_3)_4$  (336 mg, 0.3 mmol), PhI (330  $\mu\text{L}$ , 3 mmol), CuCl (300 mg, 3 mmol). The mixture was stirred for 1 h at room temperature and quenched with 1 M hydrochloric acid (10 mL), and extracted with diethyl ether (10 mL x 2). The combined ethereal layer was washed with brine and dried over  $\text{MgSO}_4$ . Filtration, evaporation, and column chromatography on silica gel ( $R_f = 0.2$ ; hexane/AcOEt = 19:1) gave **5a** (431 mg, 1.4 mmol, 47% yield) as yellow solid. Mp. 37-38 °C. FT-IR (KBr,  $\text{cm}^{-1}$ ): 2977 (m), 2932 (m), 2857 (m), 1598 (m), 1492 (m), 1356 (m), 1299 (m), 1269 (m),

(4) Shi, J.-c.; Negishi, E.-i. *J. Organomet. Chem.* **2003**, 687, 518-524.

(5) Shimizu, M.; Nakamaki, C.; Shimono, K.; Schelper, M.; Kurahashi, T.; Hiyama, T. *J. Am. Chem. Soc.*, **2005**, 127, 12506-12507.

1214 (m), 1104 (m), 975 (s), 904 (s), 854 (s), 702 (s).  $^1\text{H}$  NMR (300 MHz,  $\text{CDCl}_3$ , rt)  $\delta$  0.87 (t,  $J = 7.5$  Hz, 3H), 1.00 (s, 12H), 2.43 (q,  $J = 7.5$  Hz, 2H), 7.23-7.35 (m, 10H);  $^{13}\text{C}$  NMR (75 MHz,  $\text{CDCl}_3$ , rt)  $\delta$  13.6, 24.3, 27.1, 83.3, 125.9, 127.0, 127.9, 128.1, 128.3, 128.4, 141.4, 143.6, 153.8. The carbon signal attached to B was not observed due to low intensity;  $^{11}\text{B}$  NMR ( $\text{CDCl}_3$ , 96 MHz, rt)  $\delta$  30.16. MS (EI,  $m/z$  (relative intensity)): 334 ( $\text{M}^+$ , 70), 277 (100), 234 (51), 218 (32), 130 (78).

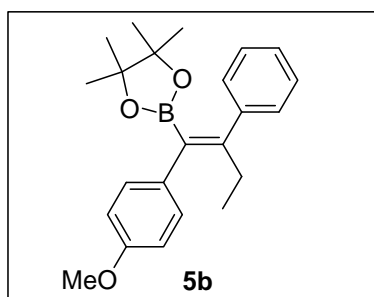

**2-[(1E)-1-(4-Methoxyphenyl)-2-phenyl-1-butenyl]-4,4,5,5-tetramethyl-1,3,2-dioxaborolane (5b).**

[865999-30-0]<sup>5</sup> White solid. Isolated yield was 62% (677 mg, 1.86 mmol).  $R_f = 0.40$  (hexane/AcOEt = 9:1). Mp. 63-64 °C. FT-IR (KBr,  $\text{cm}^{-1}$ ): 2972 (m), 2830 (m), 2874 (m), 1604 (w), 1509 (m), 1462 (m), 1440 (m), 1353 (m), 1283 (m), 1245 (m), 1142 (m), 1033 (s), 854 (s), 703 (s).  $^1\text{H}$  NMR (300 MHz,  $\text{CDCl}_3$ , rt)  $\delta$  0.86 (t,  $J = 7.5$  Hz, 3H), 1.00 (s, 12H), 2.44 (q,  $J = 7.5$  Hz, 2H), 3.82 (s, 3H), 6.89 (d,  $J = 8.7$  Hz, 2H), 7.16 (d,  $J = 8.7$  Hz, 2H), 7.27-7.36 (m, 5H);  $^{13}\text{C}$  NMR (75 MHz,  $\text{CDCl}_3$ , rt)  $\delta$  13.3, 24.4, 27.0, 55.1, 83.2, 113.6, 126.9, 127.8, 128.4, 129.5, 133.8, 143.7, 153.4, 157.8. The carbon signal attached to B was not observed due to low intensity;  $^{11}\text{B}$  NMR ( $\text{CDCl}_3$ , 96 MHz, rt)  $\delta$  30.01. MS (EI,  $m/z$  (relative intensity)): 364 ( $\text{M}^+$ , 100), 307 (35), 264 (33), 249 (35), 160 (46).

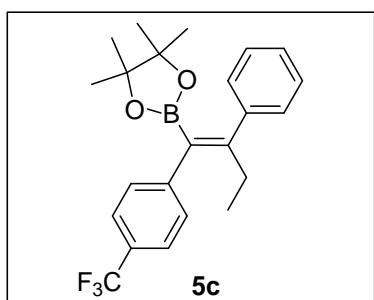

**4,4,5,5-Tetramethyl-2-[(1E)-2-phenyl-1-[4-(trifluoromethyl)phenyl]-1-butenyl]-1,3,2-dioxaborolane (5c).** [865999-27-5]<sup>5</sup> White solid. Isolated yield was 40% (481 mg, 1.20 mmol).  $R_f = 0.45$  (hexane/AcOEt =

9:1). Mp. 77-79 °C. FT-IR (KBr,  $\text{cm}^{-1}$ ): 2978 (m), 2932 (m), 2874 (m), 1613 (w), 1351 (m), 1325 (m), 1145 (m), 1105 (m), 1066 (m), 856 (s), 701 (s).  $^1\text{H}$  NMR (300 MHz,  $\text{CDCl}_3$ , rt)  $\delta$  0.85 (t,  $J = 7.5$  Hz, 3H), 1.00 (s, 12H), 2.38 (q,  $J = 7.5$  Hz 2H), 7.28-7.36 (m, 7H), 7.60 (d,  $J = 8.1$  Hz, 2H);  $^{13}\text{C}$  NMR (75 MHz,  $\text{CDCl}_3$ , rt)  $\delta$  13.1, 24.3, 27.3, 83.5, 124.4 (q,  $J = 270.1$  Hz), 125.1 (q,  $J = 3.7$  Hz), 127.3, 127.9, 128.0 (q,  $J = 32.0$  Hz), 128.3, 128.7, 143.1, 145.4, 155.4. The carbon signal attached to B was not observed due to low intensity;  $^{11}\text{B}$  NMR ( $\text{CDCl}_3$ , 96 MHz, rt)  $\delta$  30.07;  $^{19}\text{F}$  NMR ( $\text{CDCl}_3$ , 282 MHz, rt)  $\delta$  -62.74. MS (EI,  $m/z$  (relative intensity)): 402 ( $\text{M}^+$ , 27), 345 (73), 302 (20), 286 (17), 101 (100).

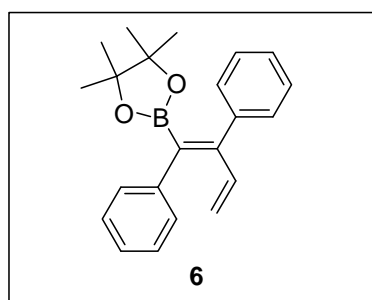

**2-[(1E)-1,2-Diphenyl-1,3-butadienyl]-4,4,5,5-tetramethyl-1,3,2-dioxaborolane (6).** A 50 mL Schlenk tube under argon was charged with  $\text{Cp}_2\text{ZrCl}_2$  (1.05g, 3.6 mmol) and 18 mL of THF. The mixture was cooled to -78 °C, and then 2 equiv of  $n\text{-BuLi}$  (4.5 mL, 7.2 mmol, 1.6 M THF solution) was added dropwise via syringe. After the reaction mixture was stirred at -78 °C for 1 h under argon, ethylene gas was introduced for 1h, and **1a** (682 mg, 3 mmol) was added at -78 °C. The resulting mixture was gradually warmed to room temperature and stirred for 1 h. To this was added vinyl ethyl ether (0.640 mL, 4.5 mmol) at room temperature. After the mixture was stirred for 20 h at 50 °C.  $\text{CuCl}$  (300 mg, 3 mmol), DMPU (0.544 mL, 4.5 mmol),  $\text{Pd}(\text{PPh}_3)_4$  (336 mg, 0.3 mmol), and iodobenzene (0.369 mL, 3.3 mmol) was added successively at room temperature, and the mixture was stirred for 3 h at 50 °C. The reaction mixture was quenched with 3 M  $\text{HCl}$ , extracted two times with diethyl ether. Extract was dried over  $\text{MgSO}_4$  and concentrated. Purification with column chromatography on silica gel ( $R_f = 0.2$ ; hexane/ $\text{Et}_2\text{O} = 19:1$ ) afforded the title compound as colorless liquid. Isolated yield was 26% (259 mg, 0.78 mmol). FT-IR (KBr,  $\text{cm}^{-1}$ ): 2978 (m), 2930 (m), 1559 (w), 1492 (m), 1442 (m), 1362 (m), 1306 (m), 1268 (m), 1215 (m), 1141 (m), 972 (m), 911 (s), 854 (s), 701 (s).  $^1\text{H}$  NMR (300 MHz,  $\text{CDCl}_3$ , rt)  $\delta$  0.98 (s, 12H), 4.87 (d,  $J = 18.9$  Hz 1H), 5.17 (d,  $J = 12.3$  Hz 1H), 6.74 (q,  $J = 9.1$  Hz 1H), 7.25-7.36 (m, 10H);  $^{13}\text{C}$  NMR (75 MHz,  $\text{CDCl}_3$ , rt)  $\delta$  24.3, 83.4, 119.4, 126.4, 127.2, 127.7, 128.0, 129.2, 130.1, 136.3, 140.1; 141.1, 148.5. The carbon signal attached to B was not observed due to their low intensity;  $^{11}\text{B}$  NMR ( $\text{CDCl}_3$ ,

96 MHz, rt)  $\delta$  30.09. MS (EI, m/z (relative intensity)): 332 ( $M^+$ , 21), 275 (17), 232 (41), 213 (41), 207 (77), 204 (100), 84 (68). HRMS Calcd for  $C_{22}H_{25}BO_2$ : 332.1948. Found:  $M^+$ , 332.1945.

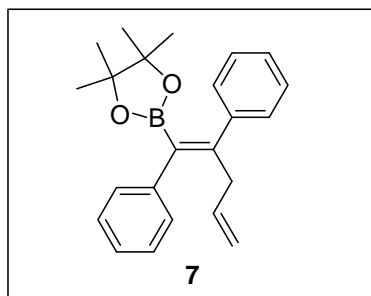

**2-[(1E)-1,2-Diphenyl-1,4-pentadienyl]-4,4,5,5-tetramethyl-1,3,2-dioxaborolane (7).** A 50 mL Schlenk tube under argon was charged with  $Cp_2ZrCl_2$  (1.05g, 3.6 mmol) and 18 mL of THF. The mixture was cooled to  $-78^\circ C$ , and then 2 equiv of n-BuLi (4.5 mL, 7.2 mmol, 1.6 M THF solution) was added dropwise via syringe. After the reaction mixture was stirred at  $-78^\circ C$  for 1 h under argon, ethylene gas (1 atm) was introduced for 1h, and **1a** (682 mg, 3 mmol) was added at  $-78^\circ C$ . The resulting mixture was gradually warmed to room temperature and stirred for 1 h. To this was added allyloxytrimethylsilane (0.743 mL, 4.5 mmol) at room temperature. After the mixture was stirred for 20 h at  $50^\circ C$ , CuCl (300 mg, 3 mmol), DMPU (0.544 mL, 4.5 mmol),  $Pd(PPh_3)_4$  (336 mg, 0.3 mmol), and iodobenzene (0.369 mL, 3.3 mmol) was added successively at room temperature, and the mixture was stirred for 3 h at  $50^\circ C$ . The reaction mixture was quenched with 3 M HCl, extracted two times with diethyl ether. Extract was dried over  $MgSO_4$  and concentrated. Purification with column chromatography on silica gel ( $R_f$ = 0.2; hexane/ $Et_2O$  = 19:1) afforded the title compound as white solid. Isolated yield was 43% (450 mg, 1.3 mmol).  $R_f$  = 0.20 (hexane/ $Et_2O$  = 19:1). Mp.  $50-52^\circ C$ . FT-IR (KBr,  $cm^{-1}$ ): 2976 (m), 2927 (m), 1596 (w), 1493 (m), 1443 (m), 1355 (m), 1302 (m), 1265 (m), 1219 (m), 1141 (m), 978 (m), 906 (s), 854 (s), 701 (s).  $^1H$  NMR (300 MHz,  $CDCl_3$ , rt)  $\delta$  1.02 (s, 12H), 3.18 (m, 2H), 4.88 (m, 2H), 5.63 (m, 1H), 7.21-7.40 (m, 10H);  $^{13}C$  NMR (75 MHz,  $CDCl_3$ , rt)  $\delta$  24.3, 38.6, 83.4, 115.9, 126.1, 127.2, 127.8, 128.1, 128.3, 128.4, 135.8, 141.2; 143.5, 149.2. The carbon signal attached to B was not observed due to their low intensity;  $^{11}B$  NMR ( $CDCl_3$ , 96 MHz, rt)  $\delta$  30.24. MS (EI, m/z (relative intensity)): 346 ( $M^+$ , 11), 247 (18), 246 (100), 218 (39), 207 (21), 142 (23), 84 (16). Anal. Calcd for  $C_{23}H_{27}BO_2$ : C, 79.78; H, 7.86%. Found: C, 79.54; H, 7.89%.

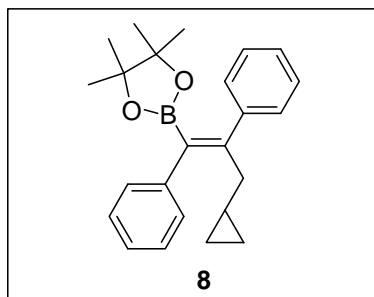

**2-[(1E)-1,2-Diphenyl-3-cyclopropyl-1-propenyl]-4,4,5,5-tetramethyl-1,3,2-dioxaborolane (8).** A 50 mL Schlenk tube under argon was charged with  $\text{Cp}_2\text{ZrCl}_2$  (1.05g, 3.6 mmol) and 18 mL of THF. The mixture was cooled to  $-78\text{ }^\circ\text{C}$ , and then 2 equiv of n-BuLi (4.5 mL, 7.2 mmol, 1.6 M THF solution) was added dropwise via syringe. After the reaction mixture was stirred at  $-78\text{ }^\circ\text{C}$  for 1 h under argon, ethylene gas (1 atm) was introduced for 1h, and **1a** (682 mg, 3 mmol) was added at  $-78\text{ }^\circ\text{C}$ . The resulting mixture was gradually warmed to room temperature and stirred for 1 h. To this was added 4-bromo-1-butene (0.456 mL, 4.5 mmol) at room temperature. After the mixture was stirred for 20 h at  $50\text{ }^\circ\text{C}$ , CuCl (300 mg, 3 mmol), DMPU (0.544 mL, 4.5 mmol),  $\text{Pd}(\text{PPh}_3)_4$  (336 mg, 0.3 mmol), and iodobenzene (0.369 mL, 3.3 mmol) was added successively at room temperature, and the mixture was stirred for 3 h at  $50\text{ }^\circ\text{C}$ . The reaction mixture was quenched with 3 M HCl, extracted two times with diethyl ether. Extract was dried over  $\text{MgSO}_4$  and concentrated. Purification with column chromatography on silica gel ( $R_f = 0.35$ ; hexane/ $\text{Et}_2\text{O} = 9:1$ ) afforded the title compound. Isolated yield was 54% (584 mg, 1.62 mmol). White solid. Isolated yield was 54% (584mg, 1.62 mmol).  $R_f = 0.35$  (hexane: $\text{Et}_2\text{O} = 9:1$ ). Mp.  $56\text{--}58\text{ }^\circ\text{C}$ . FT-IR (KBr,  $\text{cm}^{-1}$ ): 3003 (m), 2978 (m), 1599 (w), 1386 (m), 1370 (m), 1356 (m), 1303 (m), 1264 (m), 1212 (m), 1143 (m), 1020 (m), 969 (m), 855 (s), 764 (s), 705 (s).  $^1\text{H}$  NMR (300 MHz,  $\text{CDCl}_3$ , rt)  $\delta$  -0.20 (q,  $J = 5\text{ Hz}$ , 2H), 0.23 (dt,  $J = 7.5, 7.5\text{ Hz}$ , 2H), 0.56 (quin,  $J = 13.5\text{ Hz}$ , 1H), 0.99 (s, 12H), 2.31 (d,  $J = 11.5\text{ Hz}$ , 2H), 7.19-7.42 (m, 10H);  $^{13}\text{C}$  NMR (75 MHz,  $\text{CDCl}_3$ , rt)  $\delta$  4.6, 10.0, 24.3, 38.2, 83.2, 125.8, 126.8, 127.7, 128.0, 128.51, 128.54, 141.2, 144.2, 151.8. The carbon signal attached to B was not observed due to their low intensity;  $^{11}\text{B}$  NMR ( $\text{CDCl}_3$ , 96 MHz, rt)  $\delta$  30.01. MS (EI,  $m/z$  (relative intensity)): 360 ( $\text{M}^+$ , 43), 260 (44), 232 (94), 143 (100), 101 (61). Anal. Calcd for  $\text{C}_{24}\text{H}_{29}\text{BO}_2$ : C, 80.01; H, 8.11%. Found: C, 79.59; H, 8.17%.

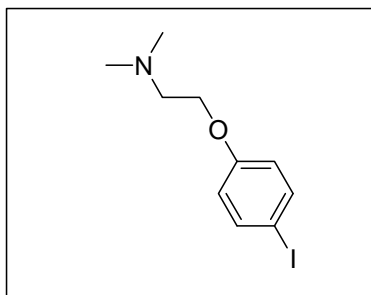

**Preparation of *N*-[2-(4-Iodophenoxy)ethyl]-*N,N*-dimethylamine.**<sup>6</sup> Potassium hydroxide (226 mg, 4 mmol) was added to a solution of 4-iodophenol (888 mg, 4 mmol) in ethanol (10 mL) at room temperature. The reaction was stirred for 3 h and the solvent evaporated to afford 4-iodophenoxide salt as a yellow oil. Sodium hydroxide (200 mg, 5 mmol) in water (1 mL) was added to a cold solution of 2-dimethylaminoethylchloride hydrochloride (600 mg, 4.2 mmol) in water (2 mL) at 0 °C. The reaction mixture was saturated with solid NaCl and extracted with toluene (5 × 3 mL). The combined toluene extracts were dried over KOH and filtered. The resulting solution was added to the 4-iodophenoxide salt and refluxed for 12 h. The reaction was cooled to room temperature and filtered. The filtrate was washed with saturated aqueous NaOH (3 × 10 mL) and brine (5 mL). The organic phase was dried, filtered, and purified by bulb to bulb distillation (160-170 °C/2.8 Torr) to give 703 mg (2.4 mmol, 60%) of the title compound as a brown oil. <sup>1</sup>H NMR (CDCl<sub>3</sub>, 300 MHz, rt)  $\delta$  2.33 (s, 6H), 2.72 (t, *J* = 5.7 Hz, 2H), 4.02 (d, *J* = 5.7 Hz, 2H), 6.66-6.70 (m, 2H), 7.52-7.56 (m, 2H). <sup>1</sup>H NMR spectrum in agreement with literature.

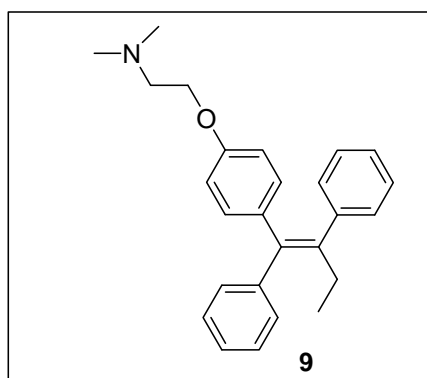

**(*Z*)-Tamoxifen ((*Z*)-2-[4-(1,2-Diphenyl-1-butenyl)phenoxy]-*N,N*-dimethylethanamine) (9).** [10540-29-

(6) Tessier, P. E.; Penwell, A. J.; Souza, F. E. S.; Fallis, A. G. *Org.Lett.* **2003**, 5, 2989-2992.

1]<sup>7</sup> A mixture of **5a** (18 mg, 0.054 mmol), *N*-[2-(4-iodophenoxy)ethyl]-*N,N*-dimethylamine (70 mg, 0.24 mmol), Pd(dba)<sub>2</sub> (12 mg, 0.02 mmol), 0.1 M P<sup>t</sup>Bu<sub>3</sub>/hexane (400  $\mu$ l, 0.04 mmol), and 3 M NaOH aqueous solution (300  $\mu$ L, 0.9 mmol) in THF (2 mL) was stirred at 60 °C for 48 h. The reaction mixture was quenched with saturated aq. NH<sub>4</sub>Cl (1 mL). The resulting mixture was diluted with chloroform (10 mL) and washed with water (3 mL). The organic layer was separated, dried over anhydrous magnesium sulfate, and concentrated under vacuum. The crude product was purified by column chromatography (CHCl<sub>3</sub>/MeOH/Et<sub>3</sub>N = 100:10:1) to give **9** as pale yellow solid (52 mg, 0.14 mmol, 70% yield). FT-IR (KBr, cm<sup>-1</sup>): 3021 (m), 2930 (m), 2761 (m), 1610 (w), 1512 (m), 1247 (m). <sup>1</sup>H NMR (300 MHz, CDCl<sub>3</sub>, rt)  $\delta$  0.93 (t, *J* = 7.5 Hz, 3H), 2.33 (s, 6H), 2.46 (q, *J* = 7.5 Hz, 2H), 2.69 (t, *J* = 5.7 Hz, 2H), 3.95 (t, *J* = 5.7 Hz, 2H), 6.56 (d, *J* = 8.7 Hz, 2H), 6.77 (d, *J* = 8.7 Hz, 2H), 7.11-7.37 (m, 10H); <sup>13</sup>C NMR (75 MHz, CDCl<sub>3</sub>, rt)  $\delta$  13.6, 29.0, 45.7, 58.2, 65.4, 113.3, 126.0, 126.5, 127.8, 128.1, 129.4, 129.7, 131.8, 135.6, 138.1, 141.3, 142.4, 143.8, 156.6. MS (EI, *m/z* (relative intensity)): 371 (M<sup>+</sup>, 23), 252 (5), 165 (5), 152 (4), 129 (4), 72 (100).

---

(7) Itami, K.; Kamei, T.; Yoshida, J.-i. *J. Am. Chem. Soc.* **2003**, *125*, 14670-14671.

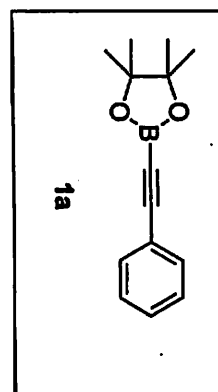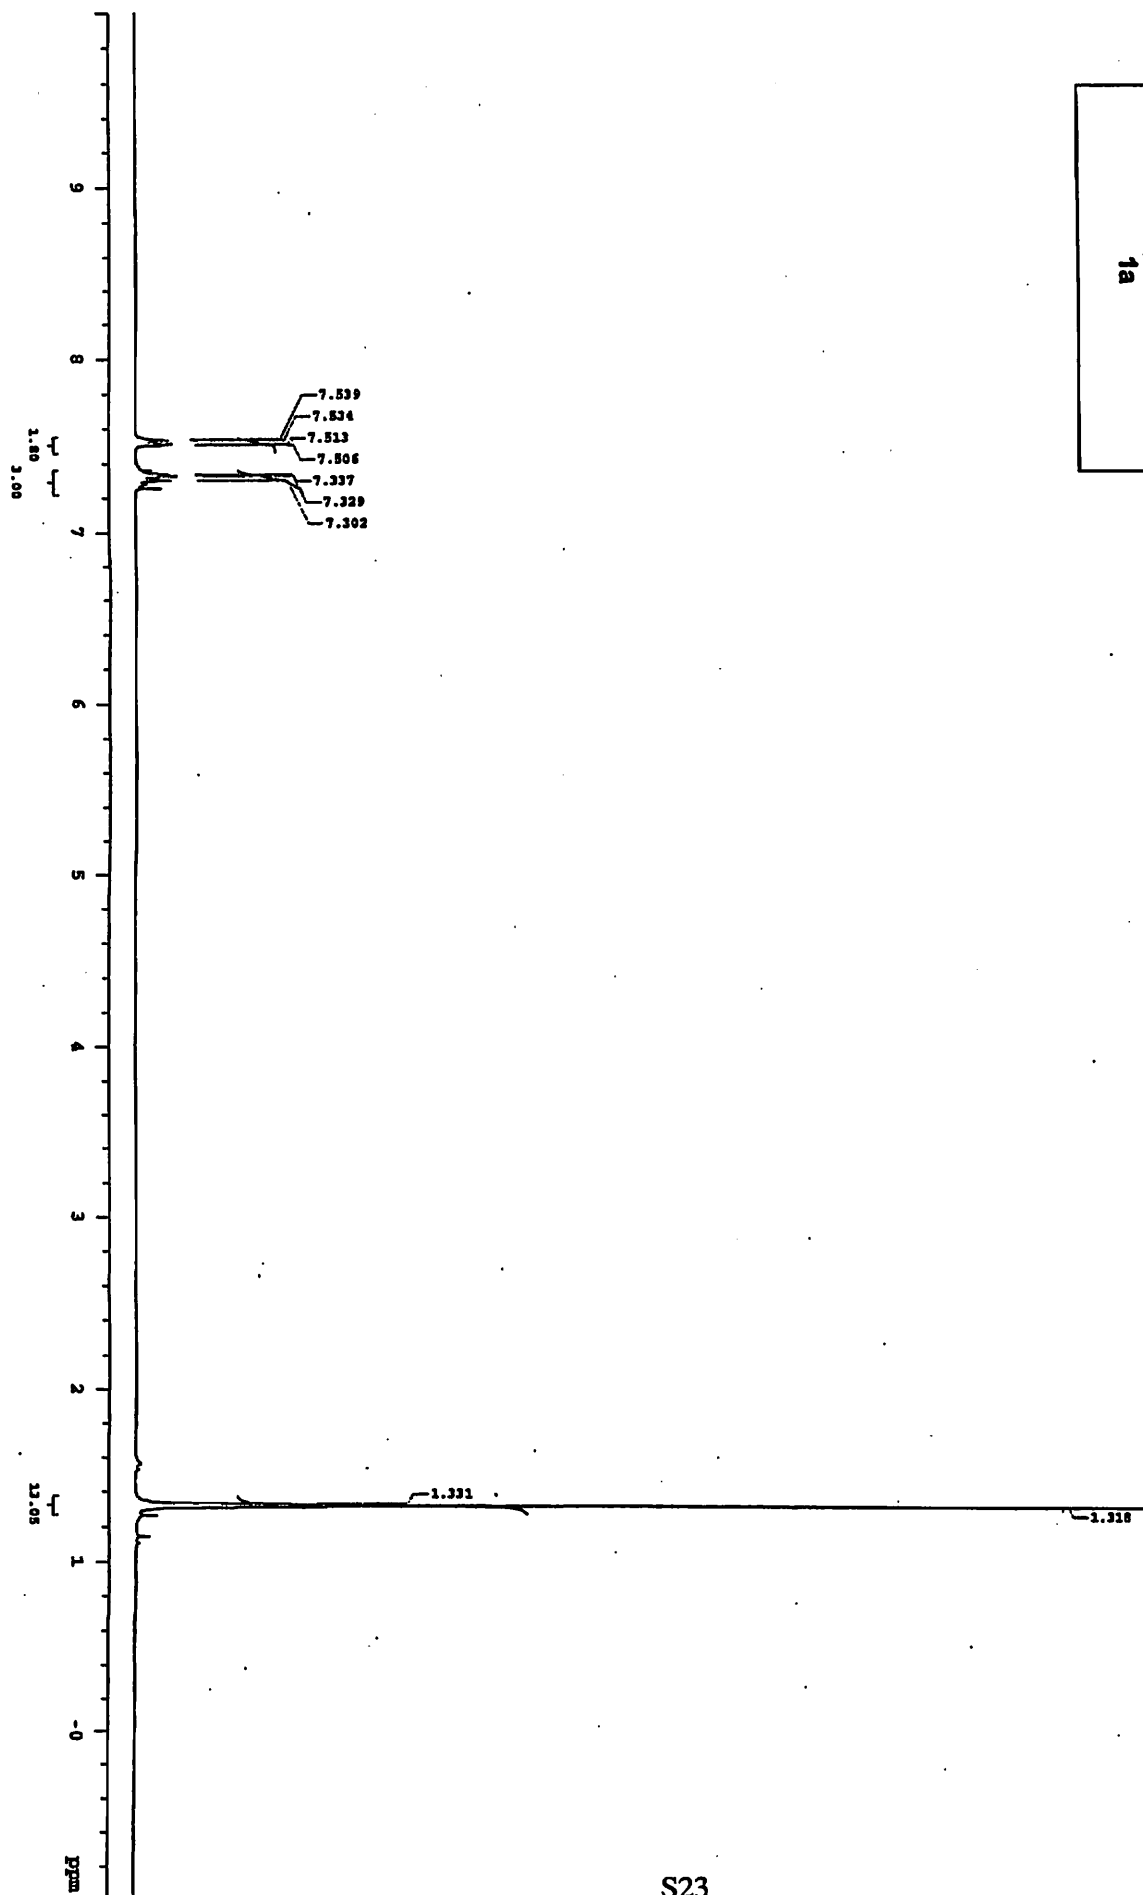

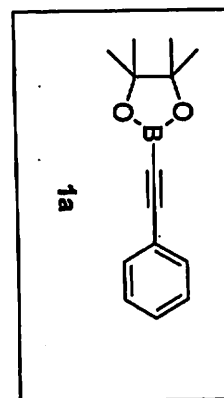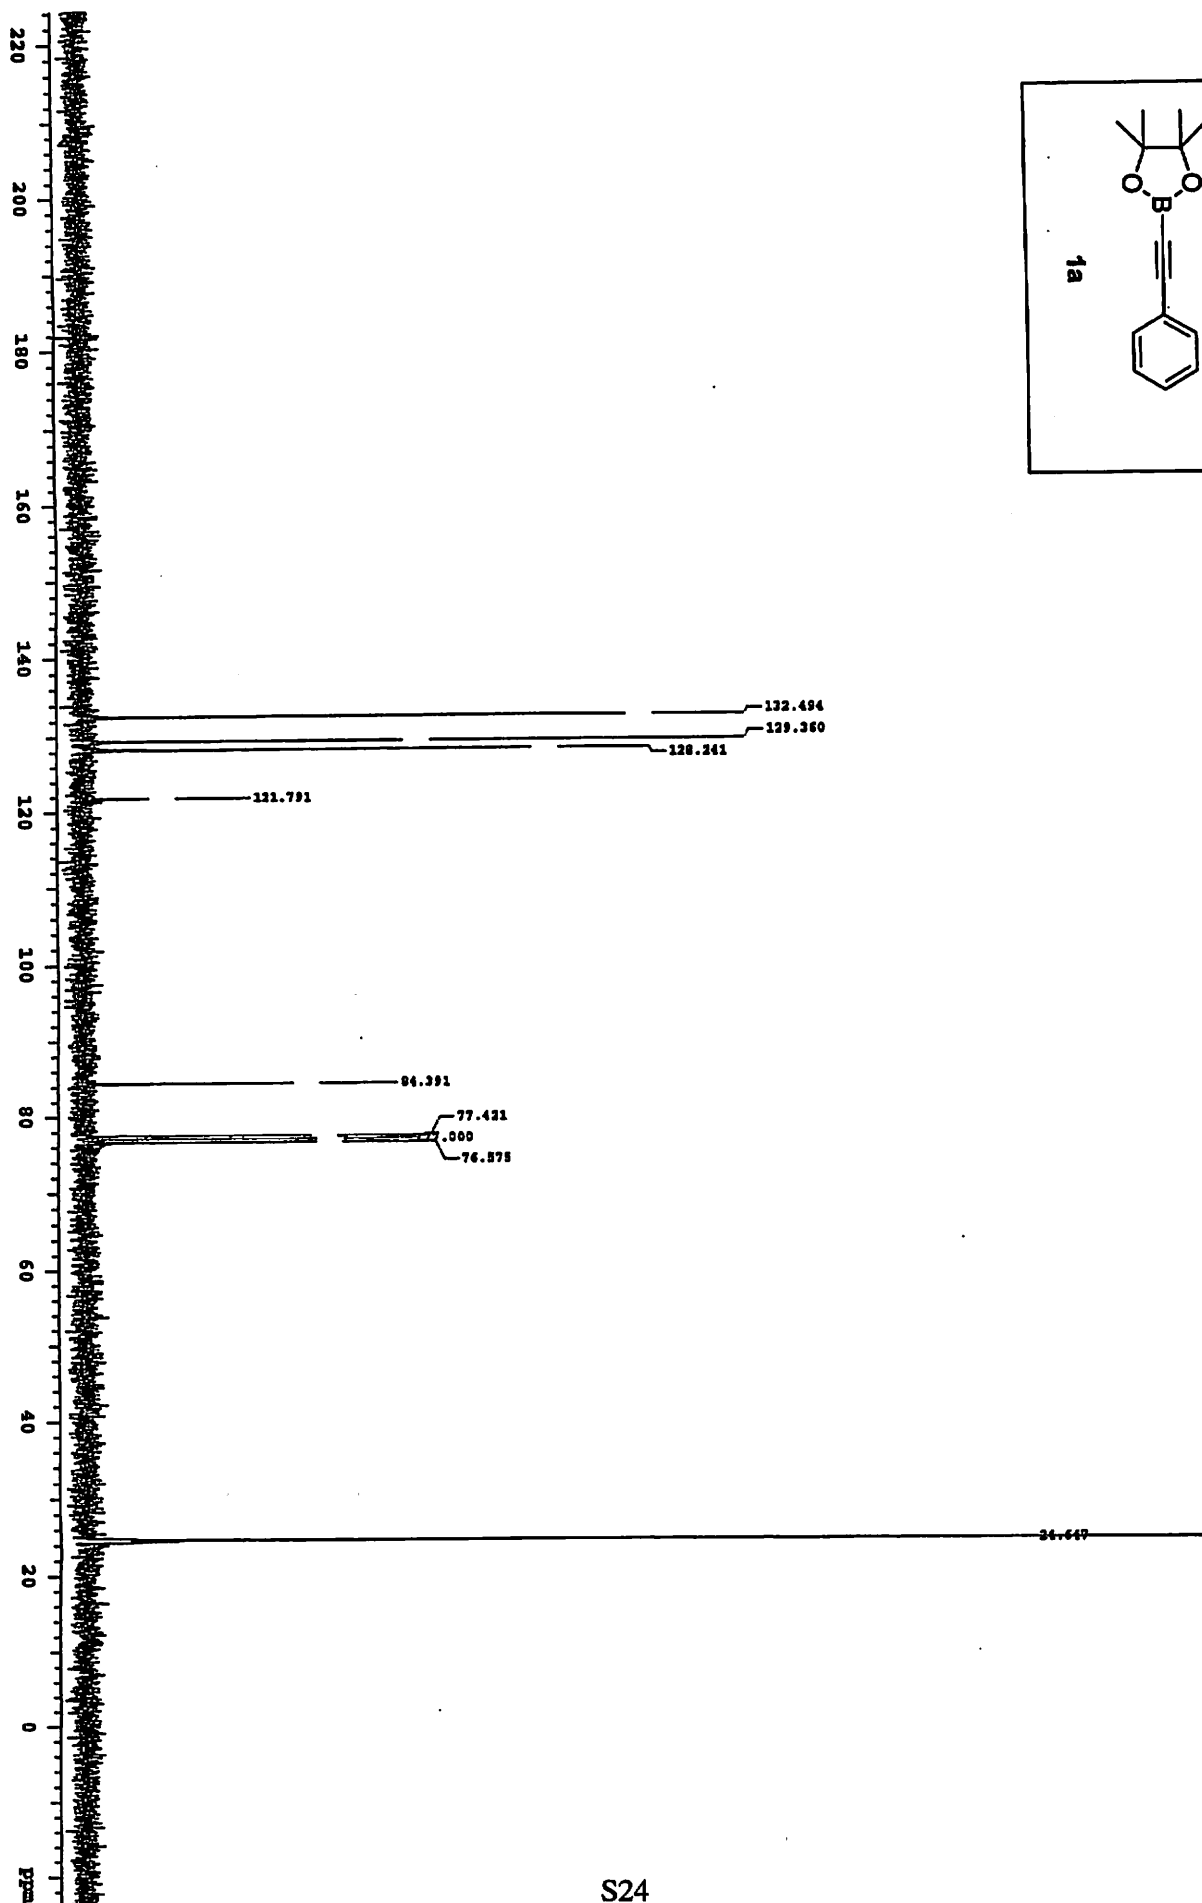

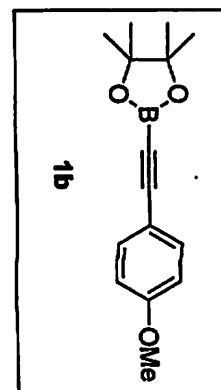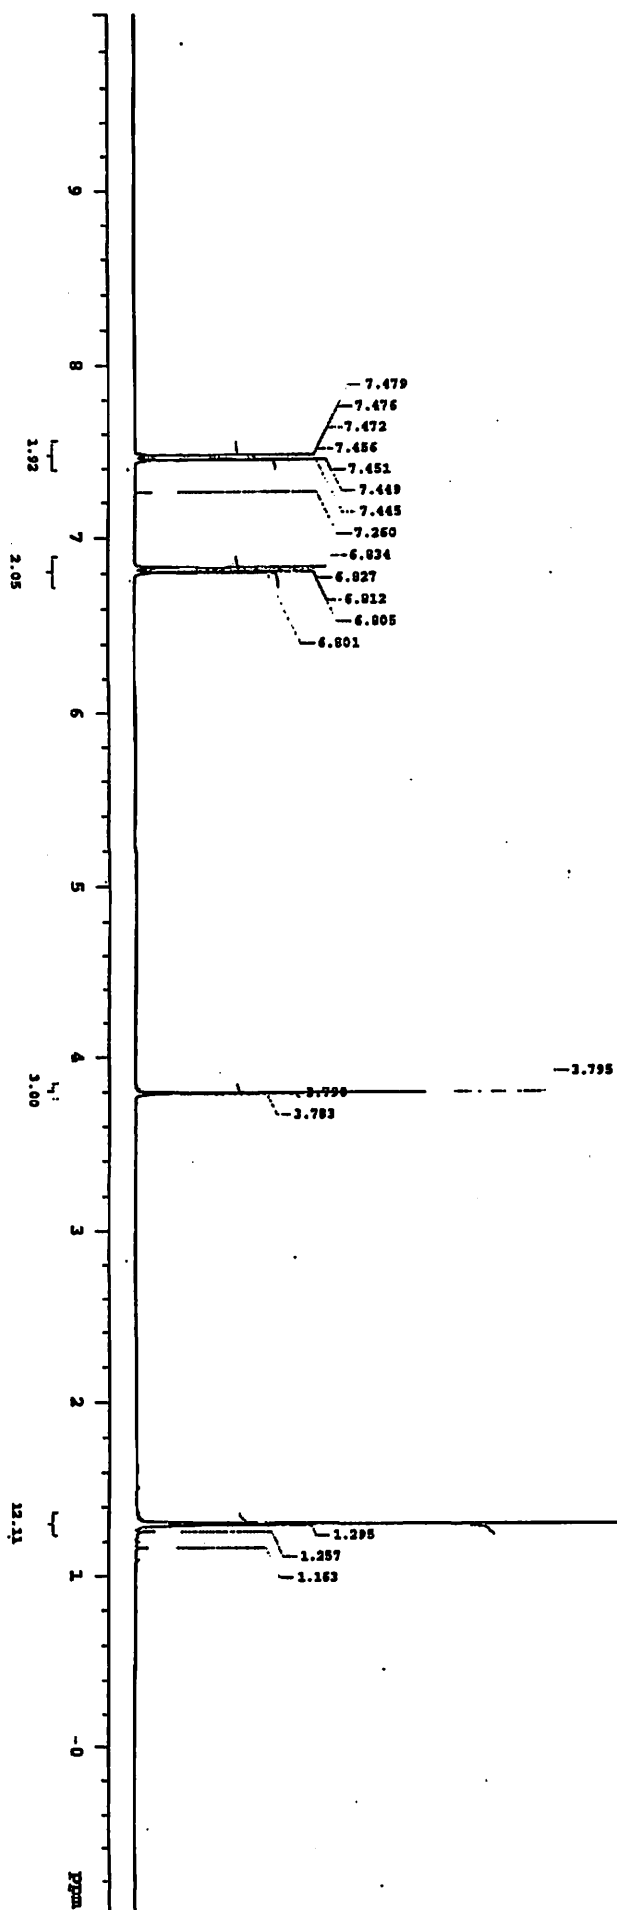

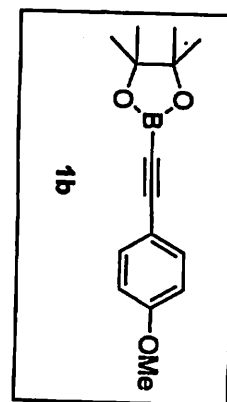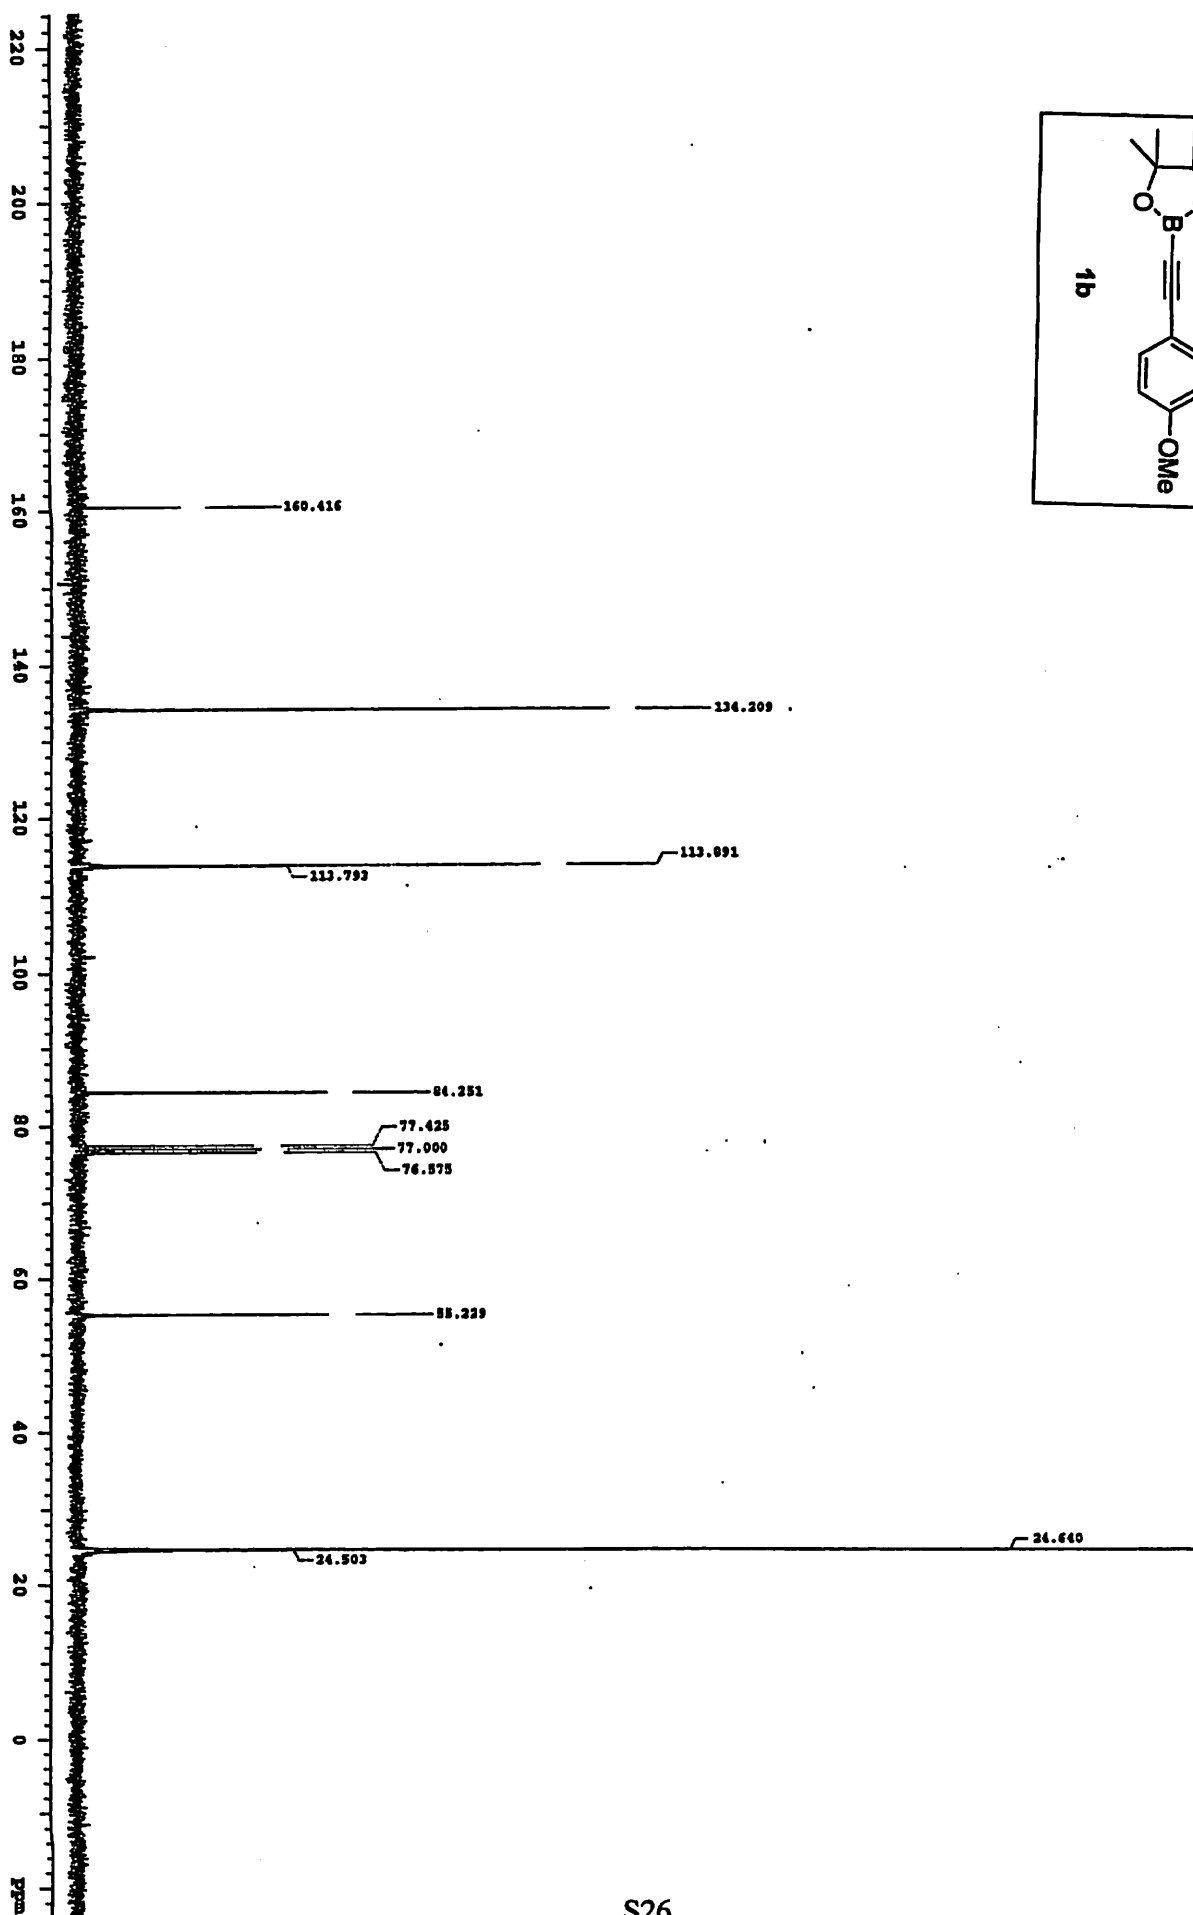

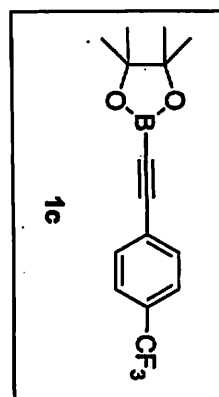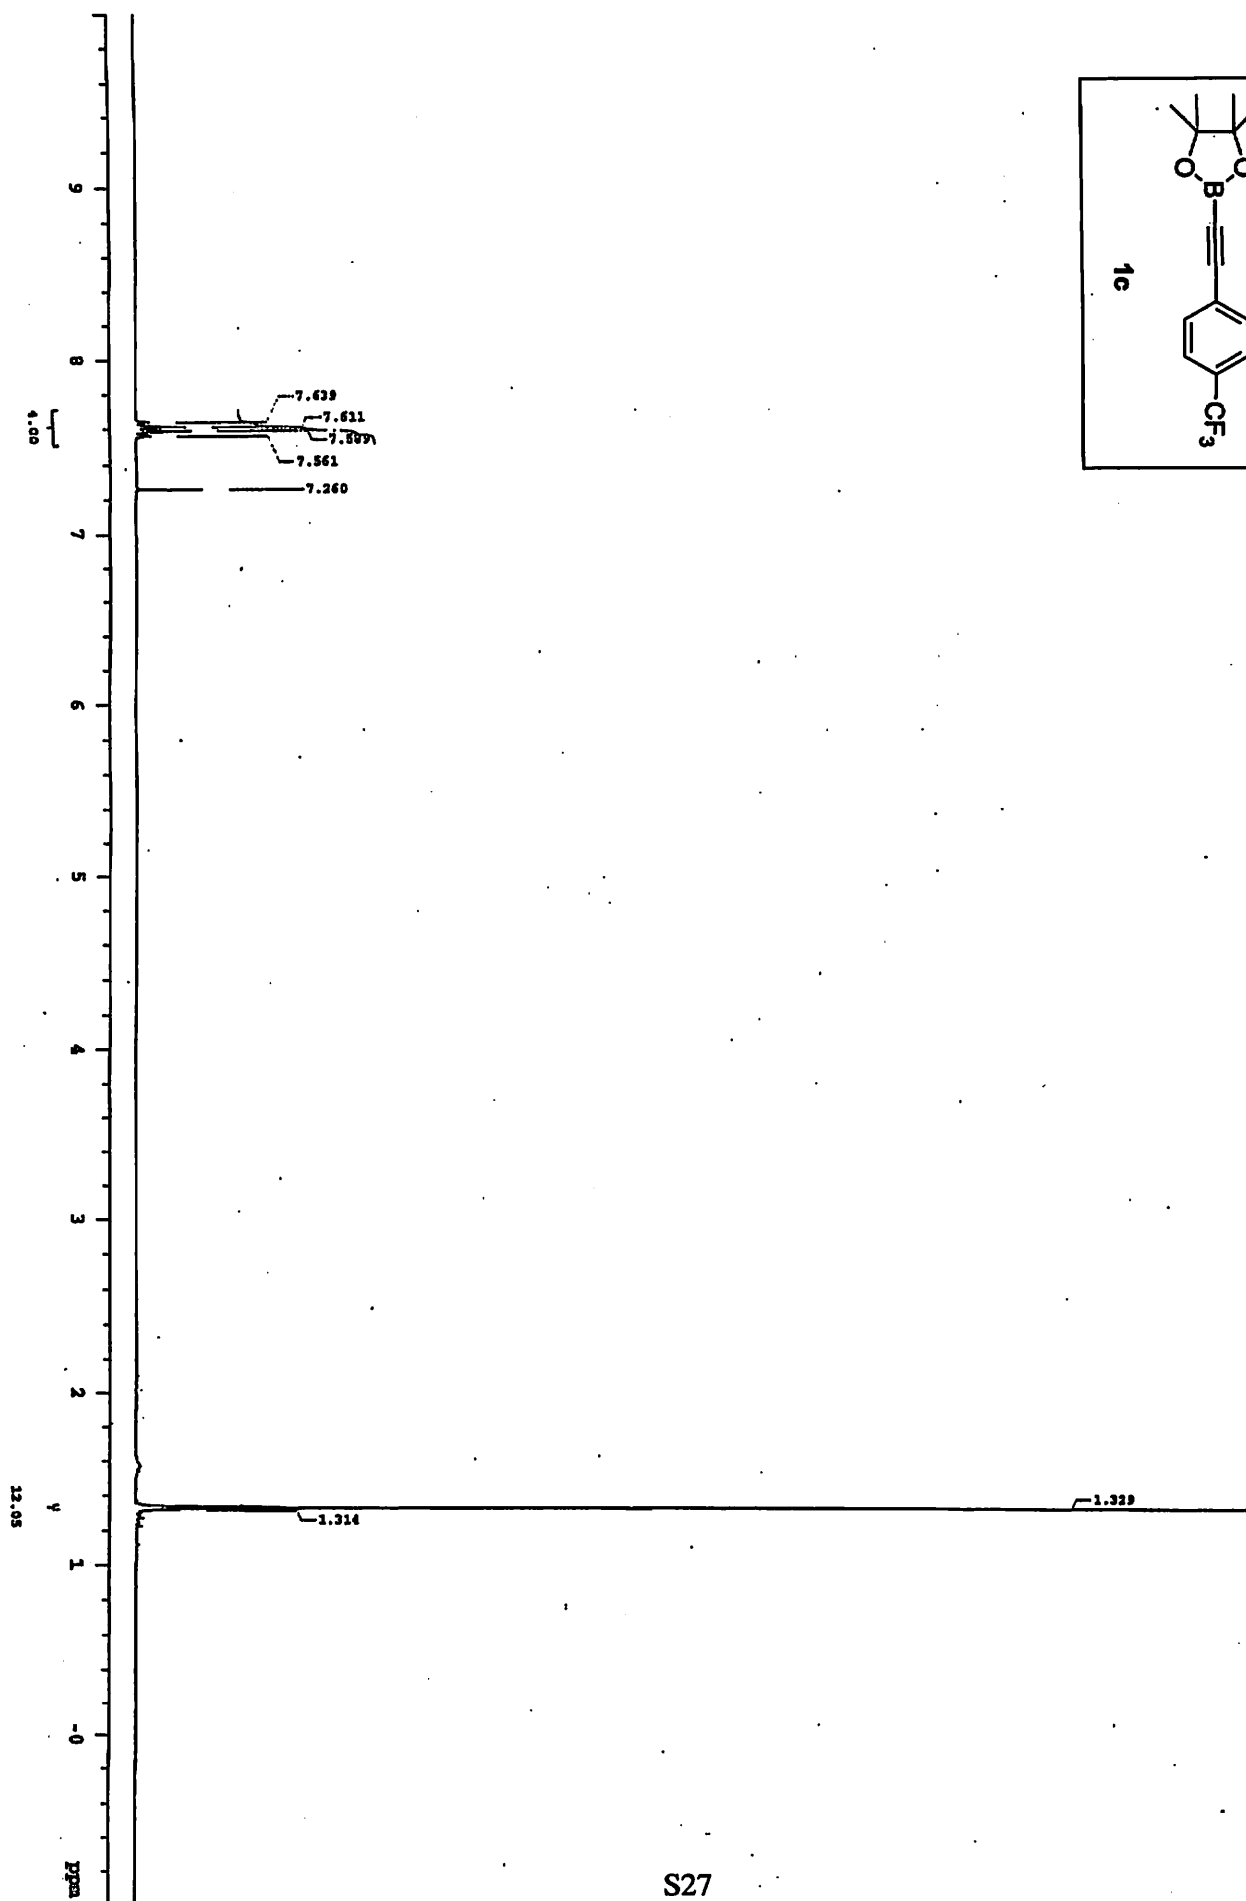

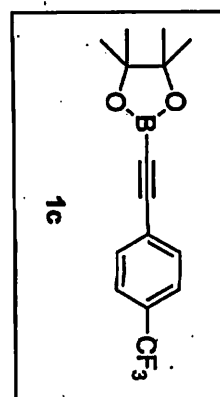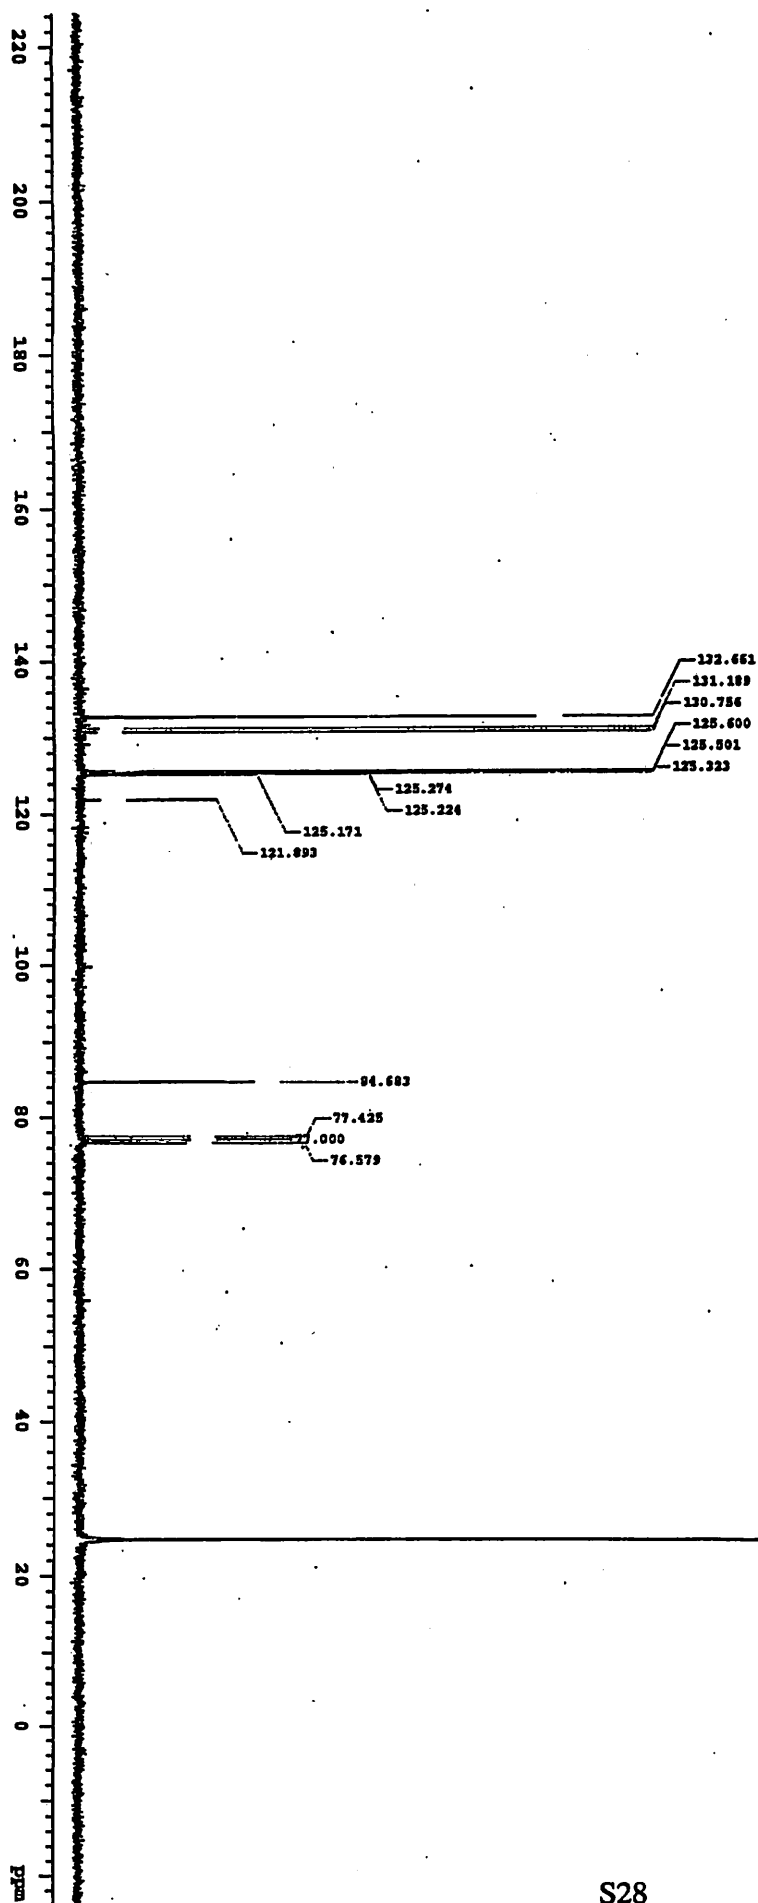

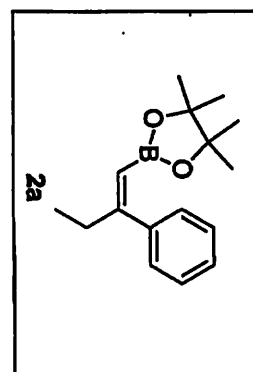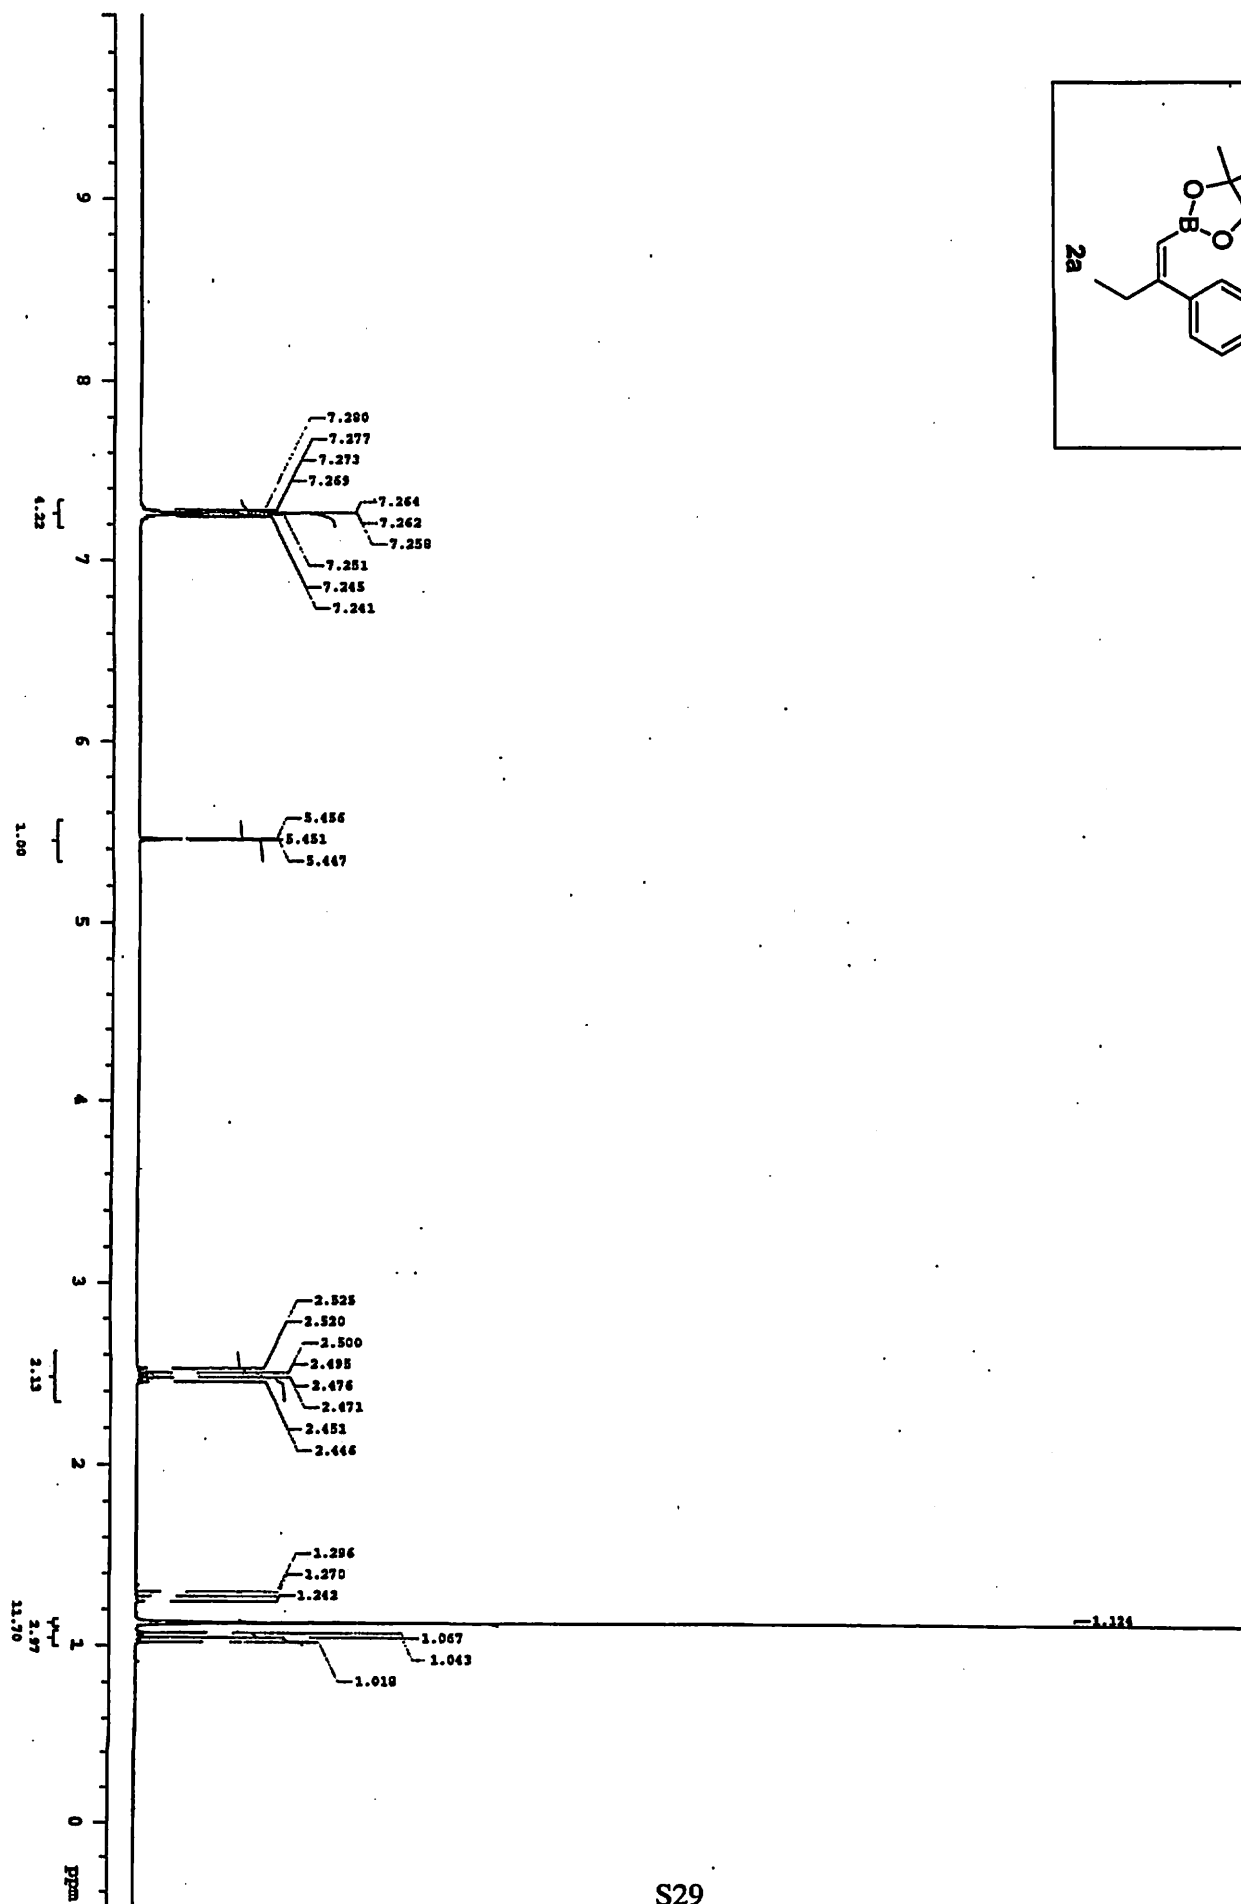

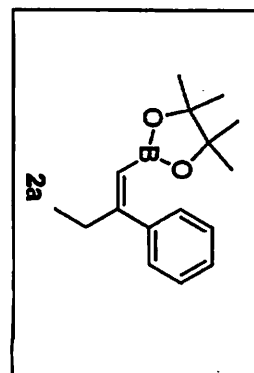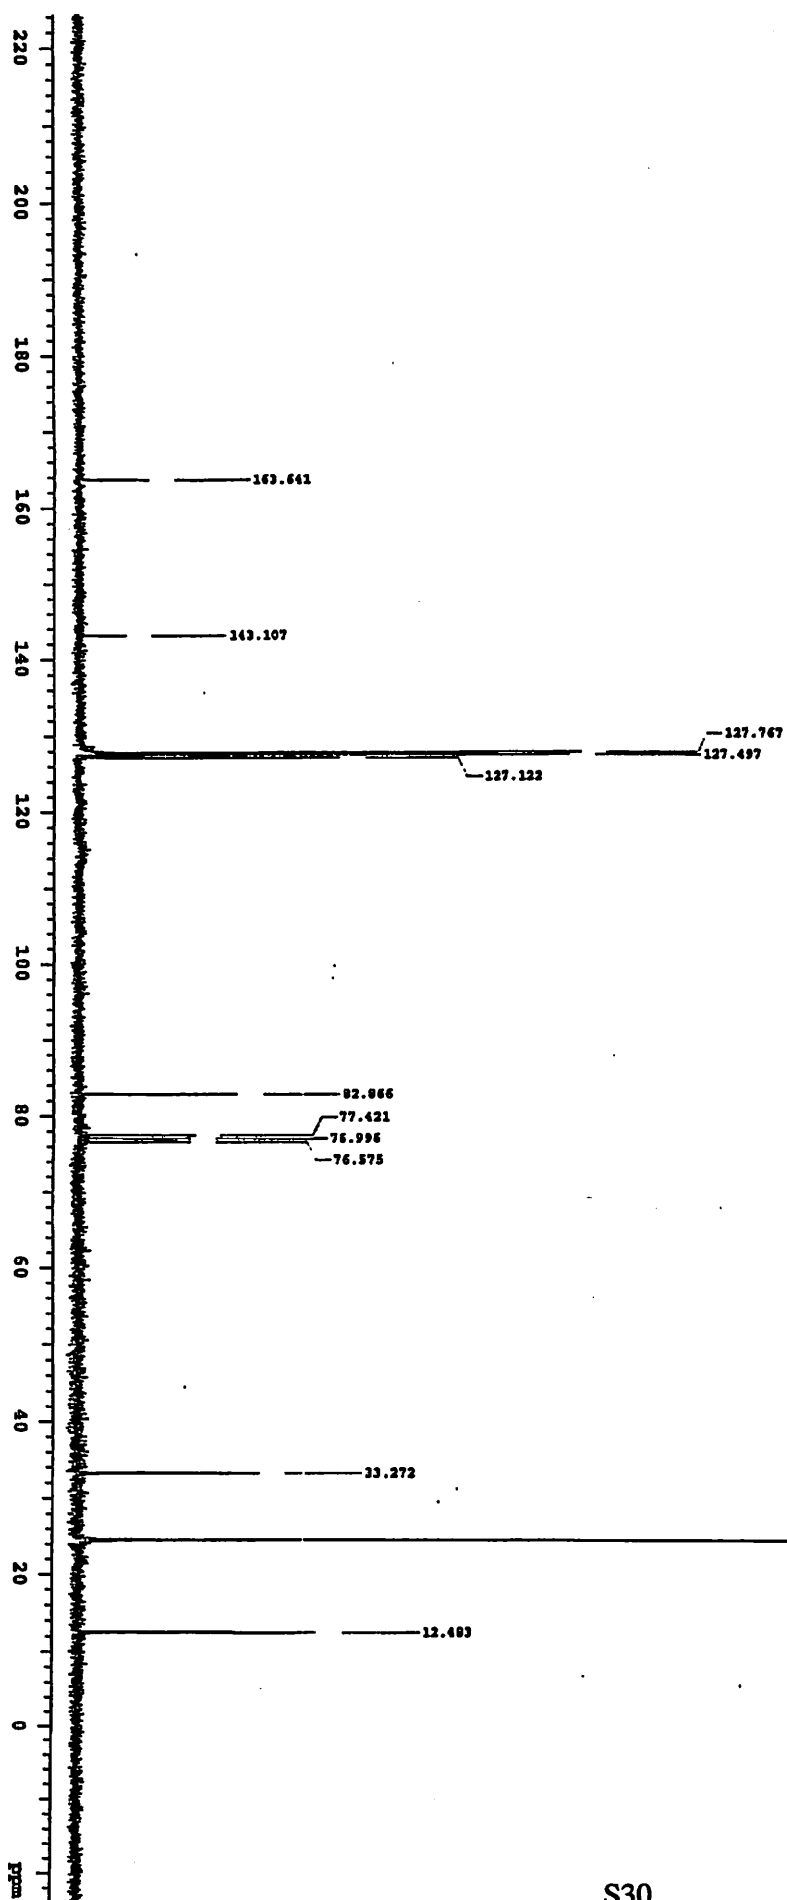

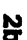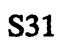

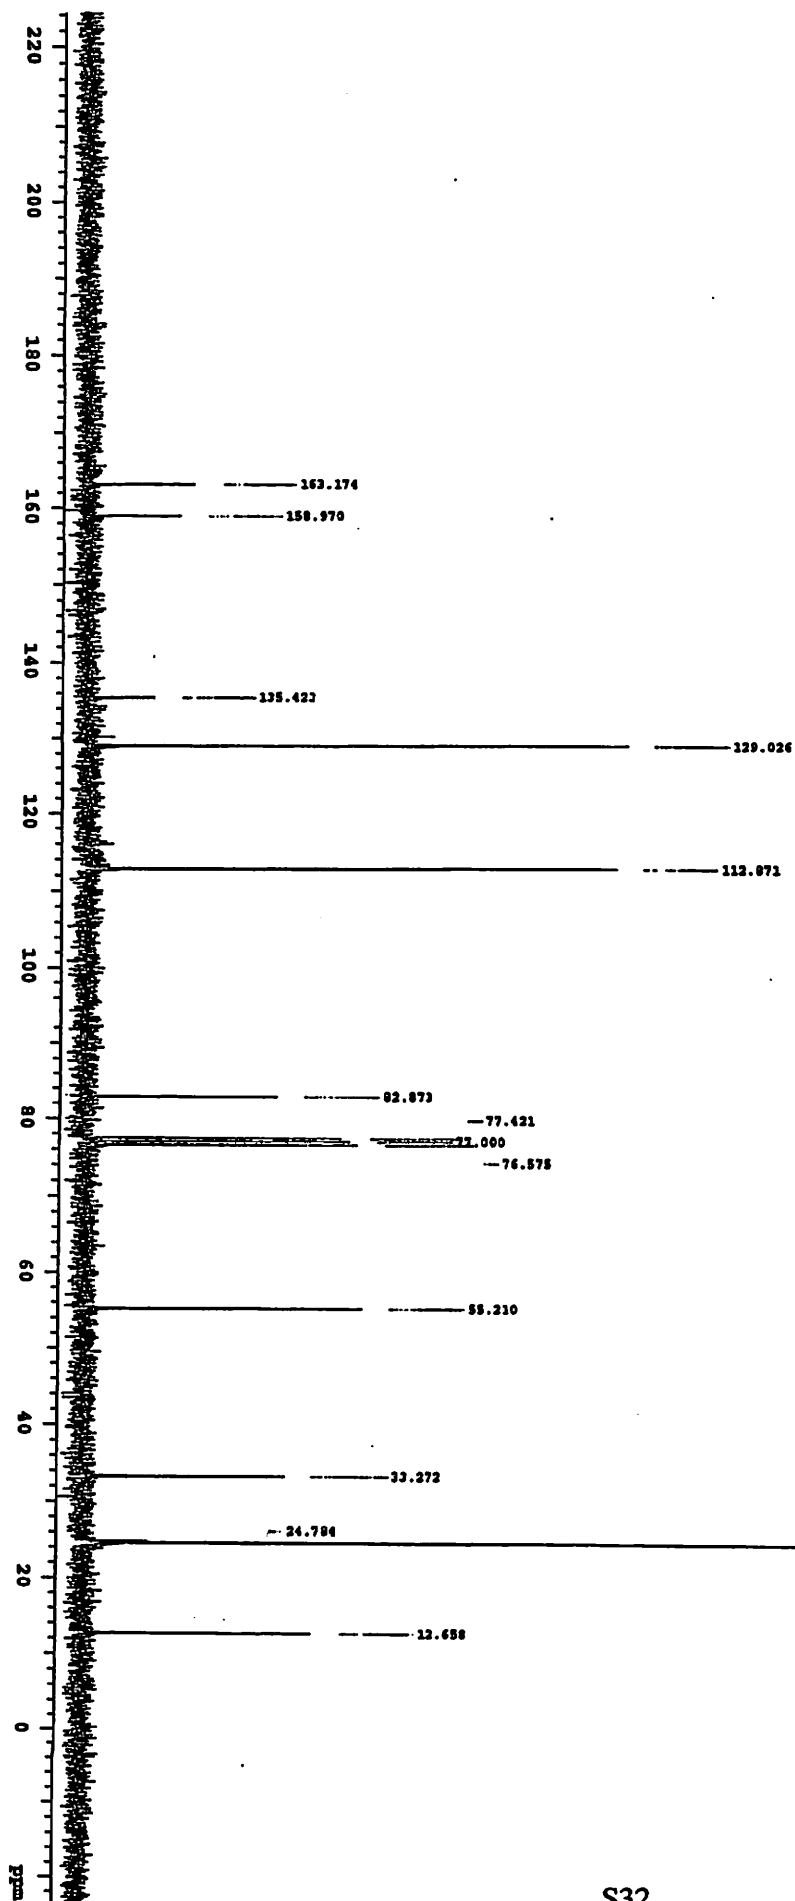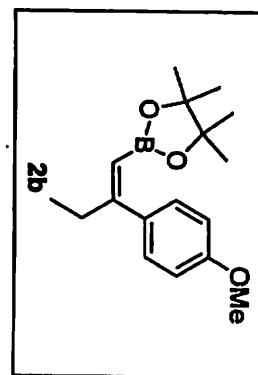

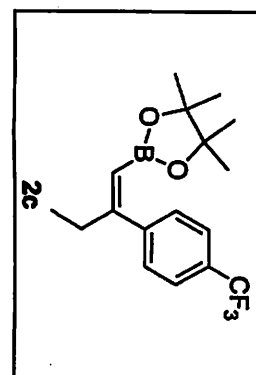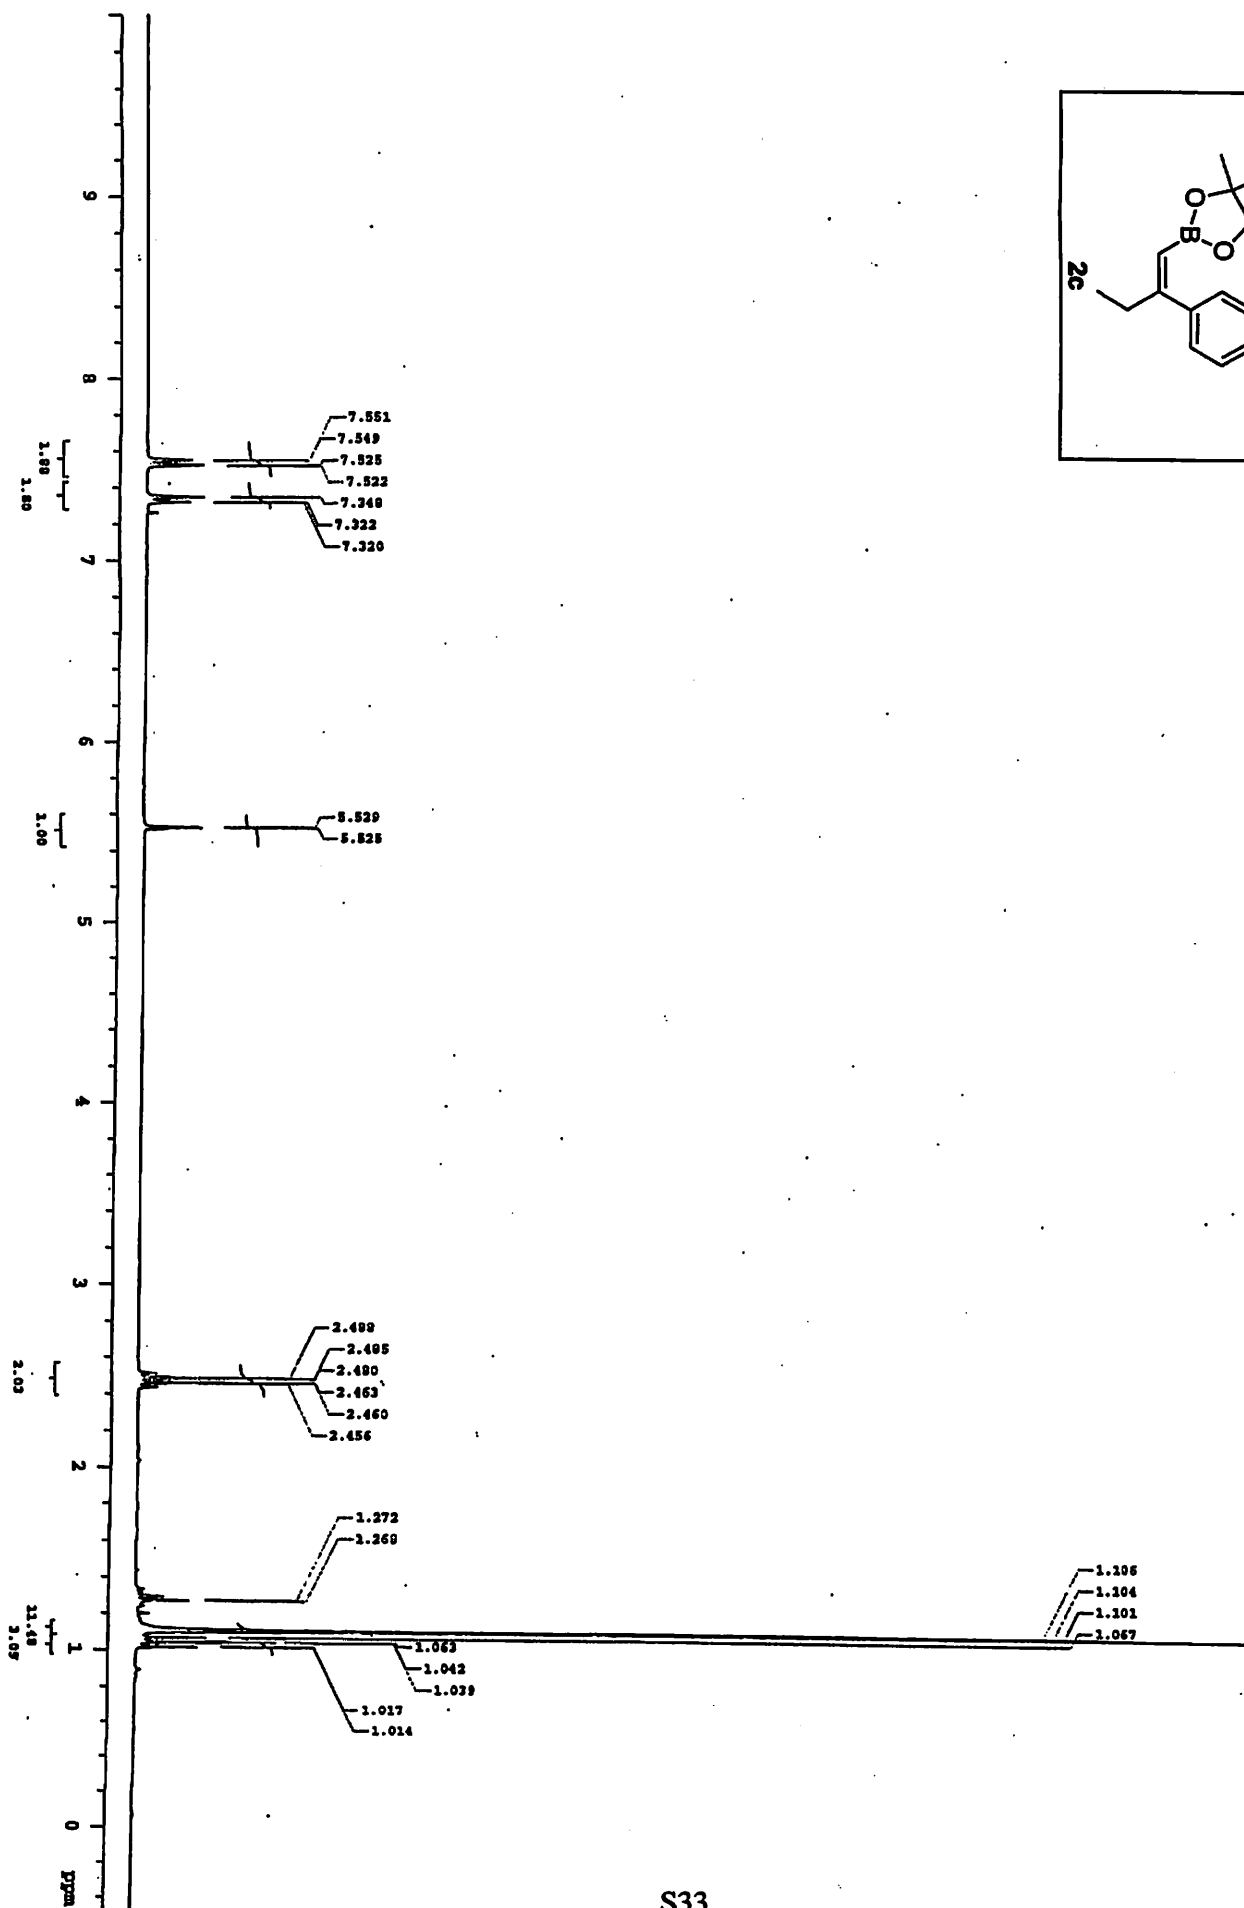

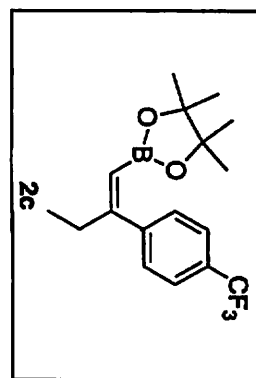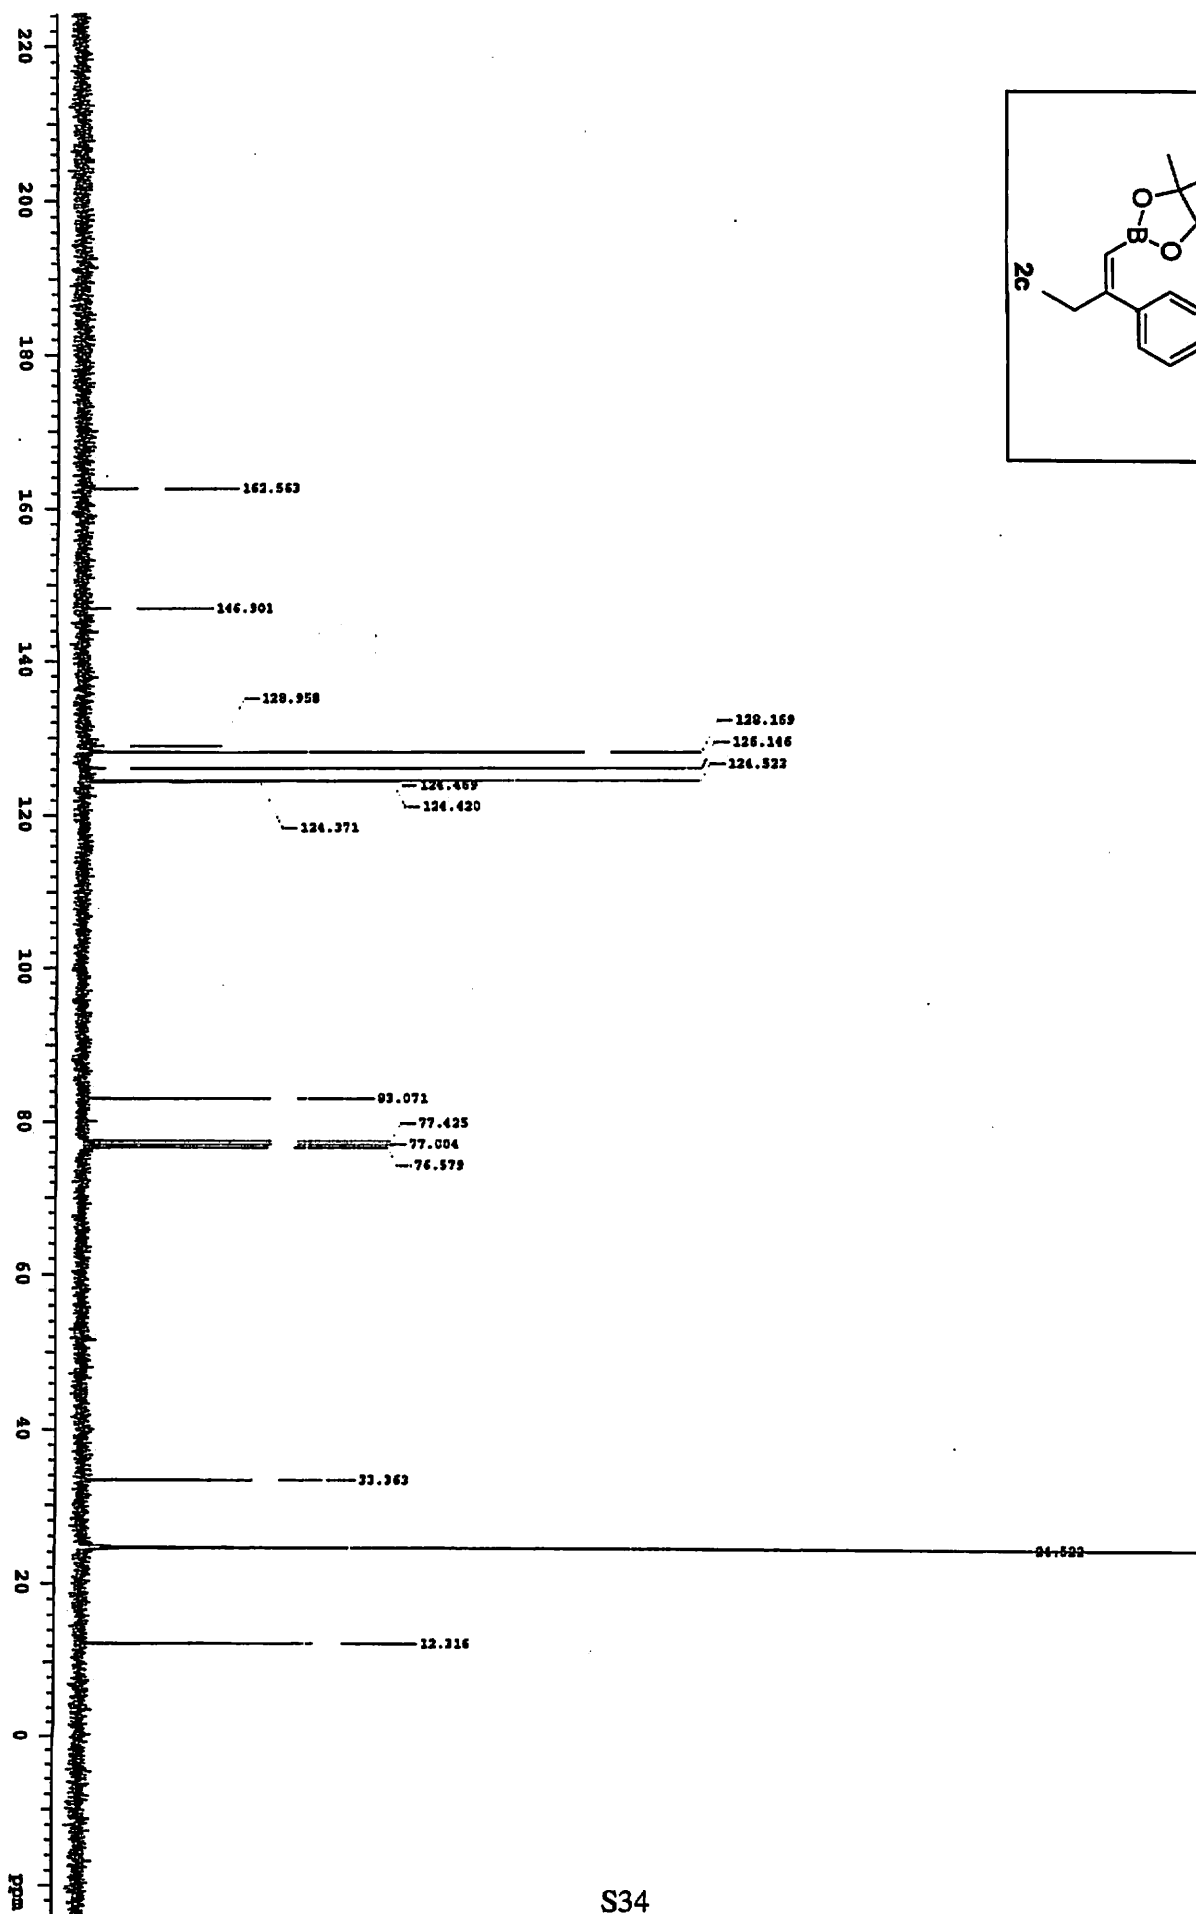

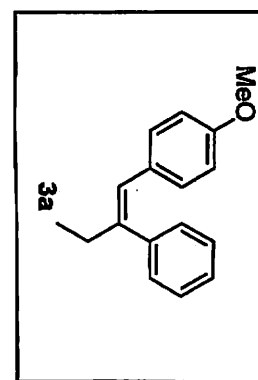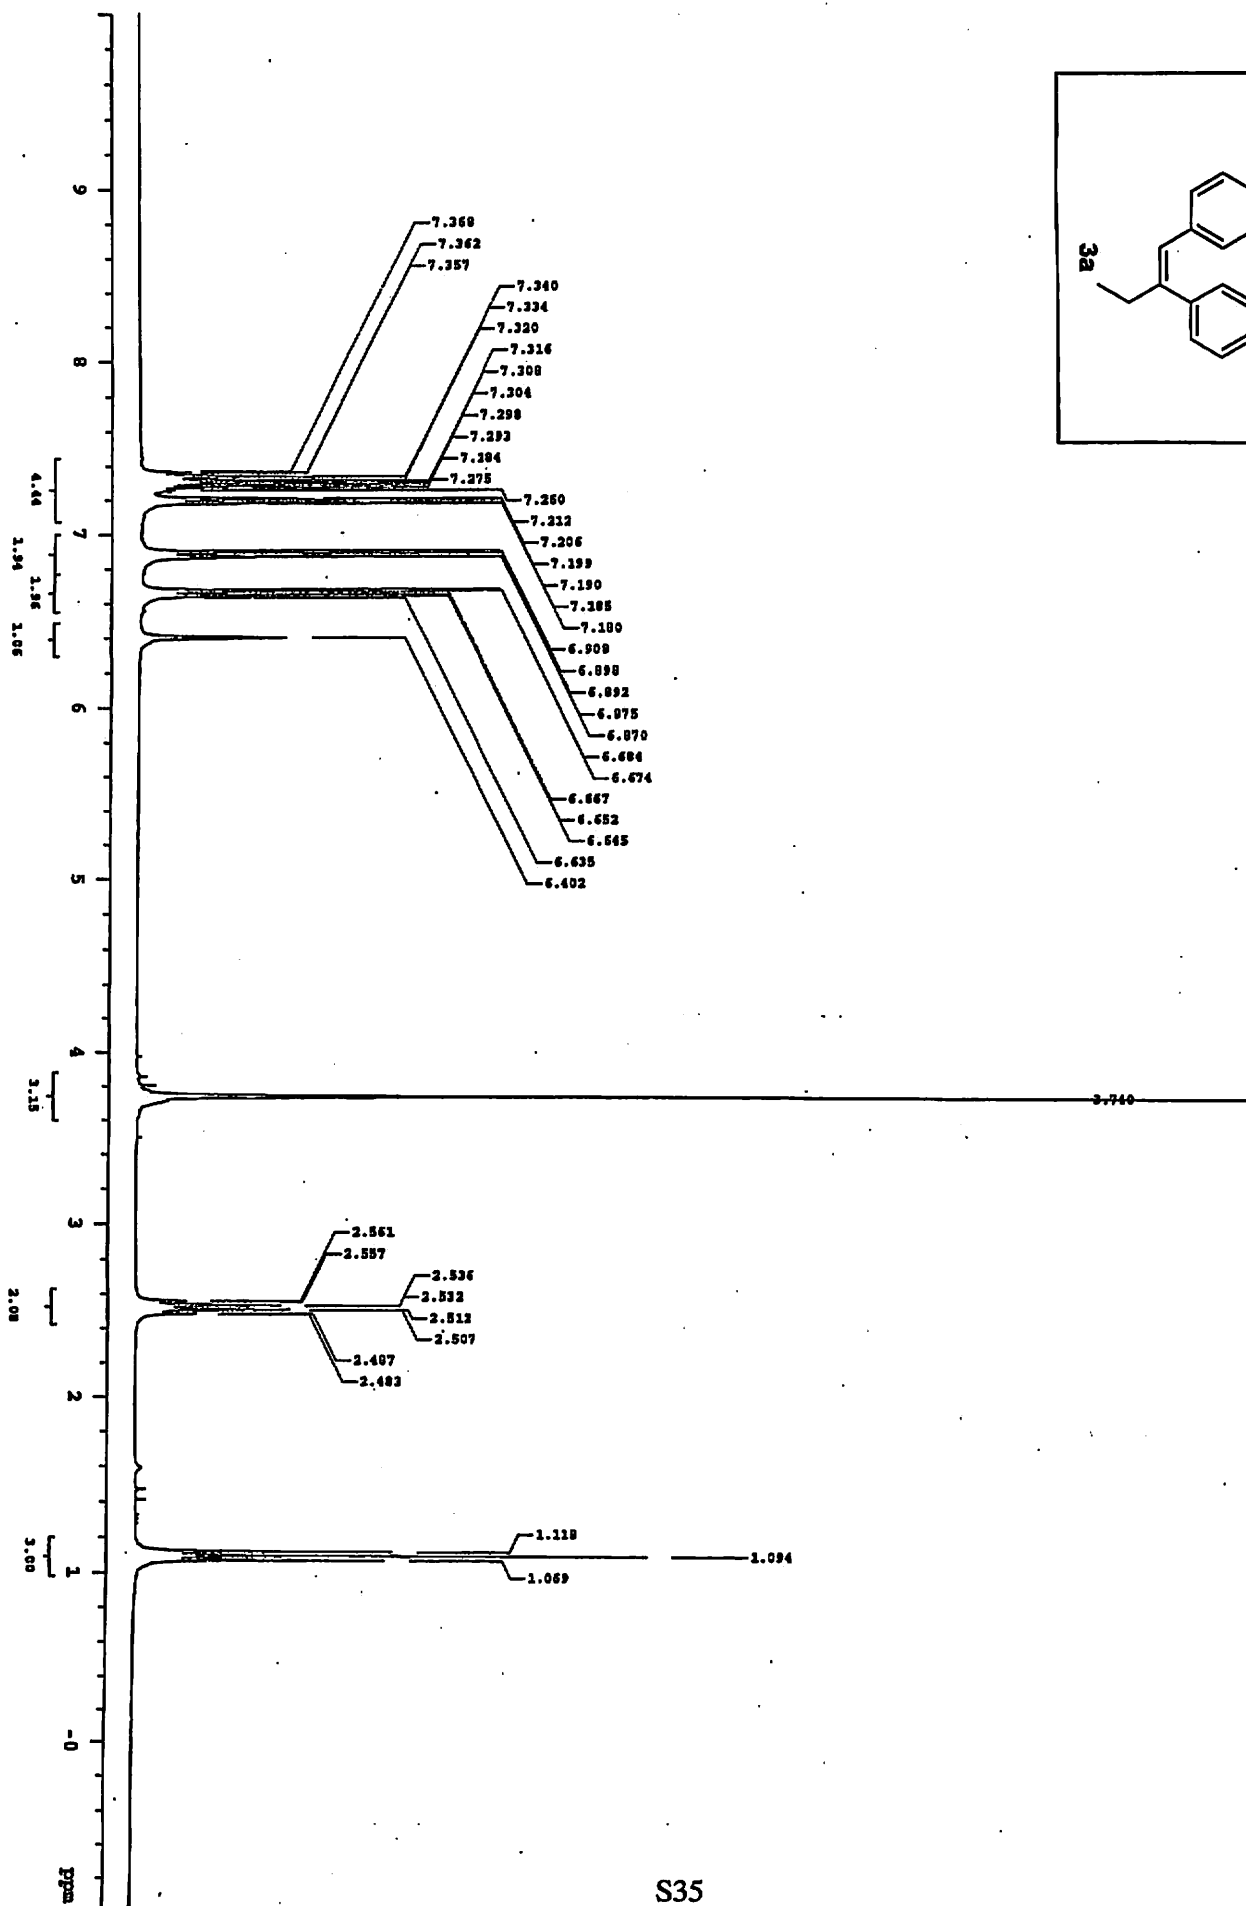

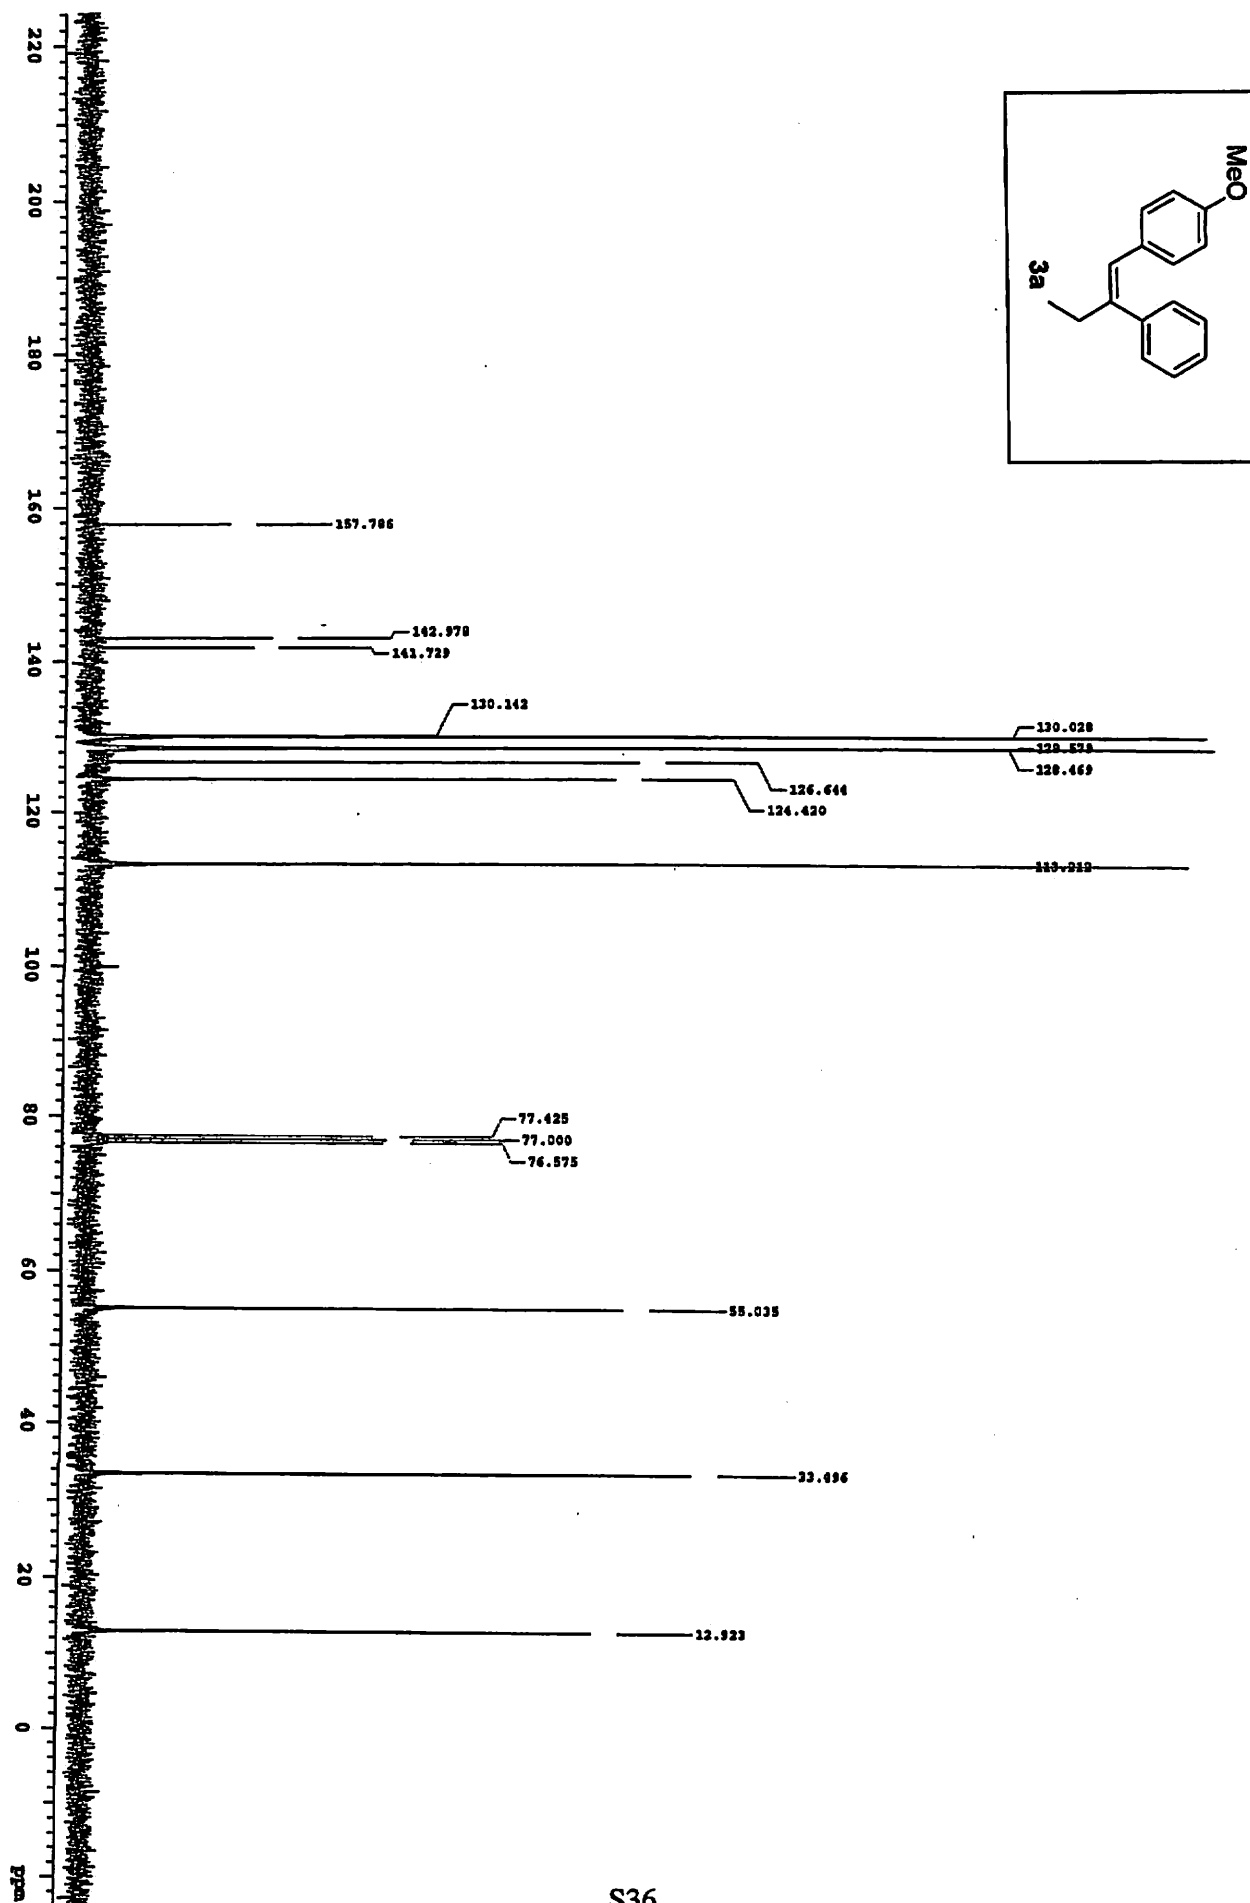

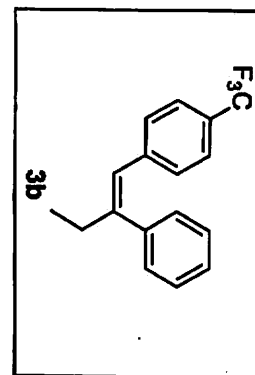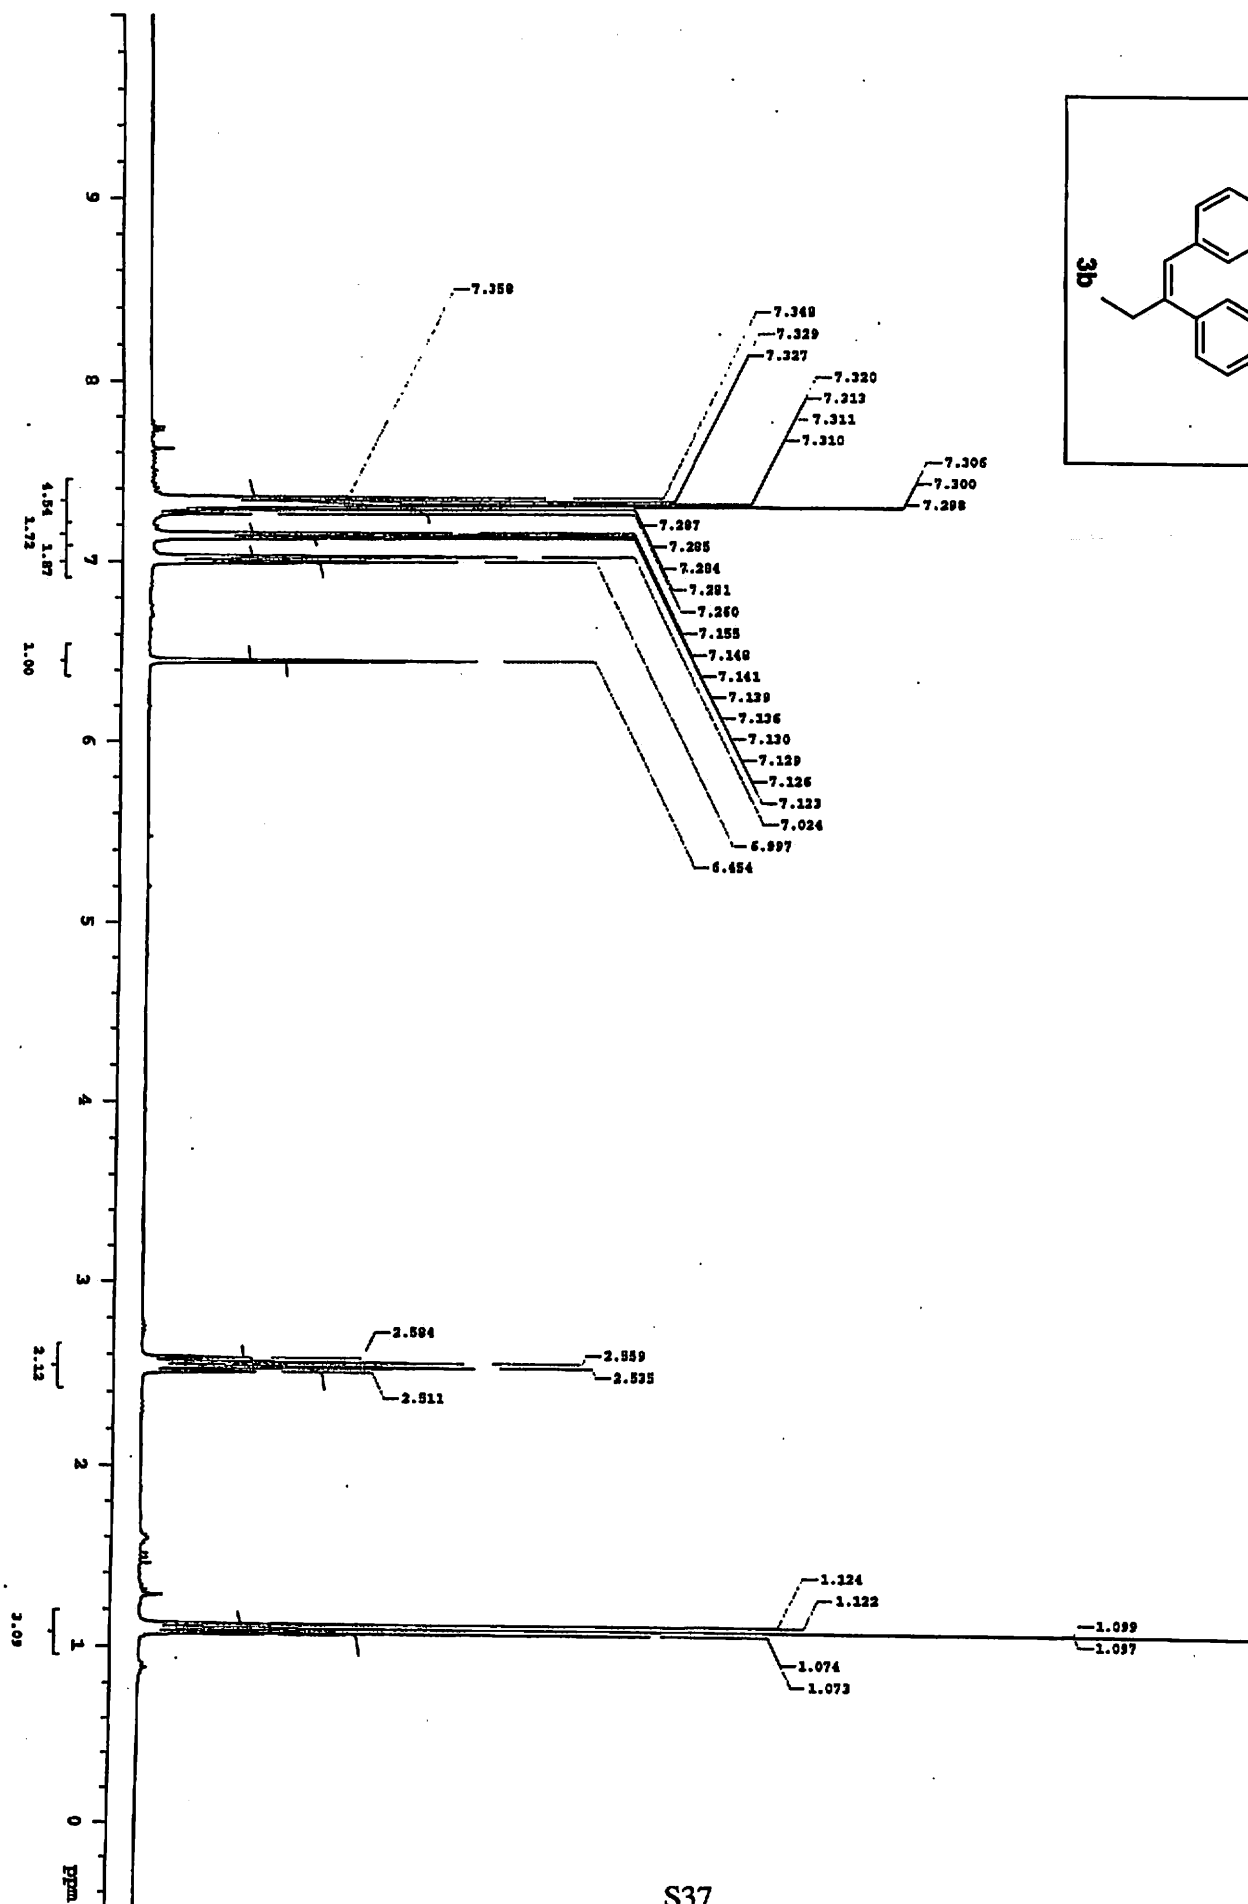

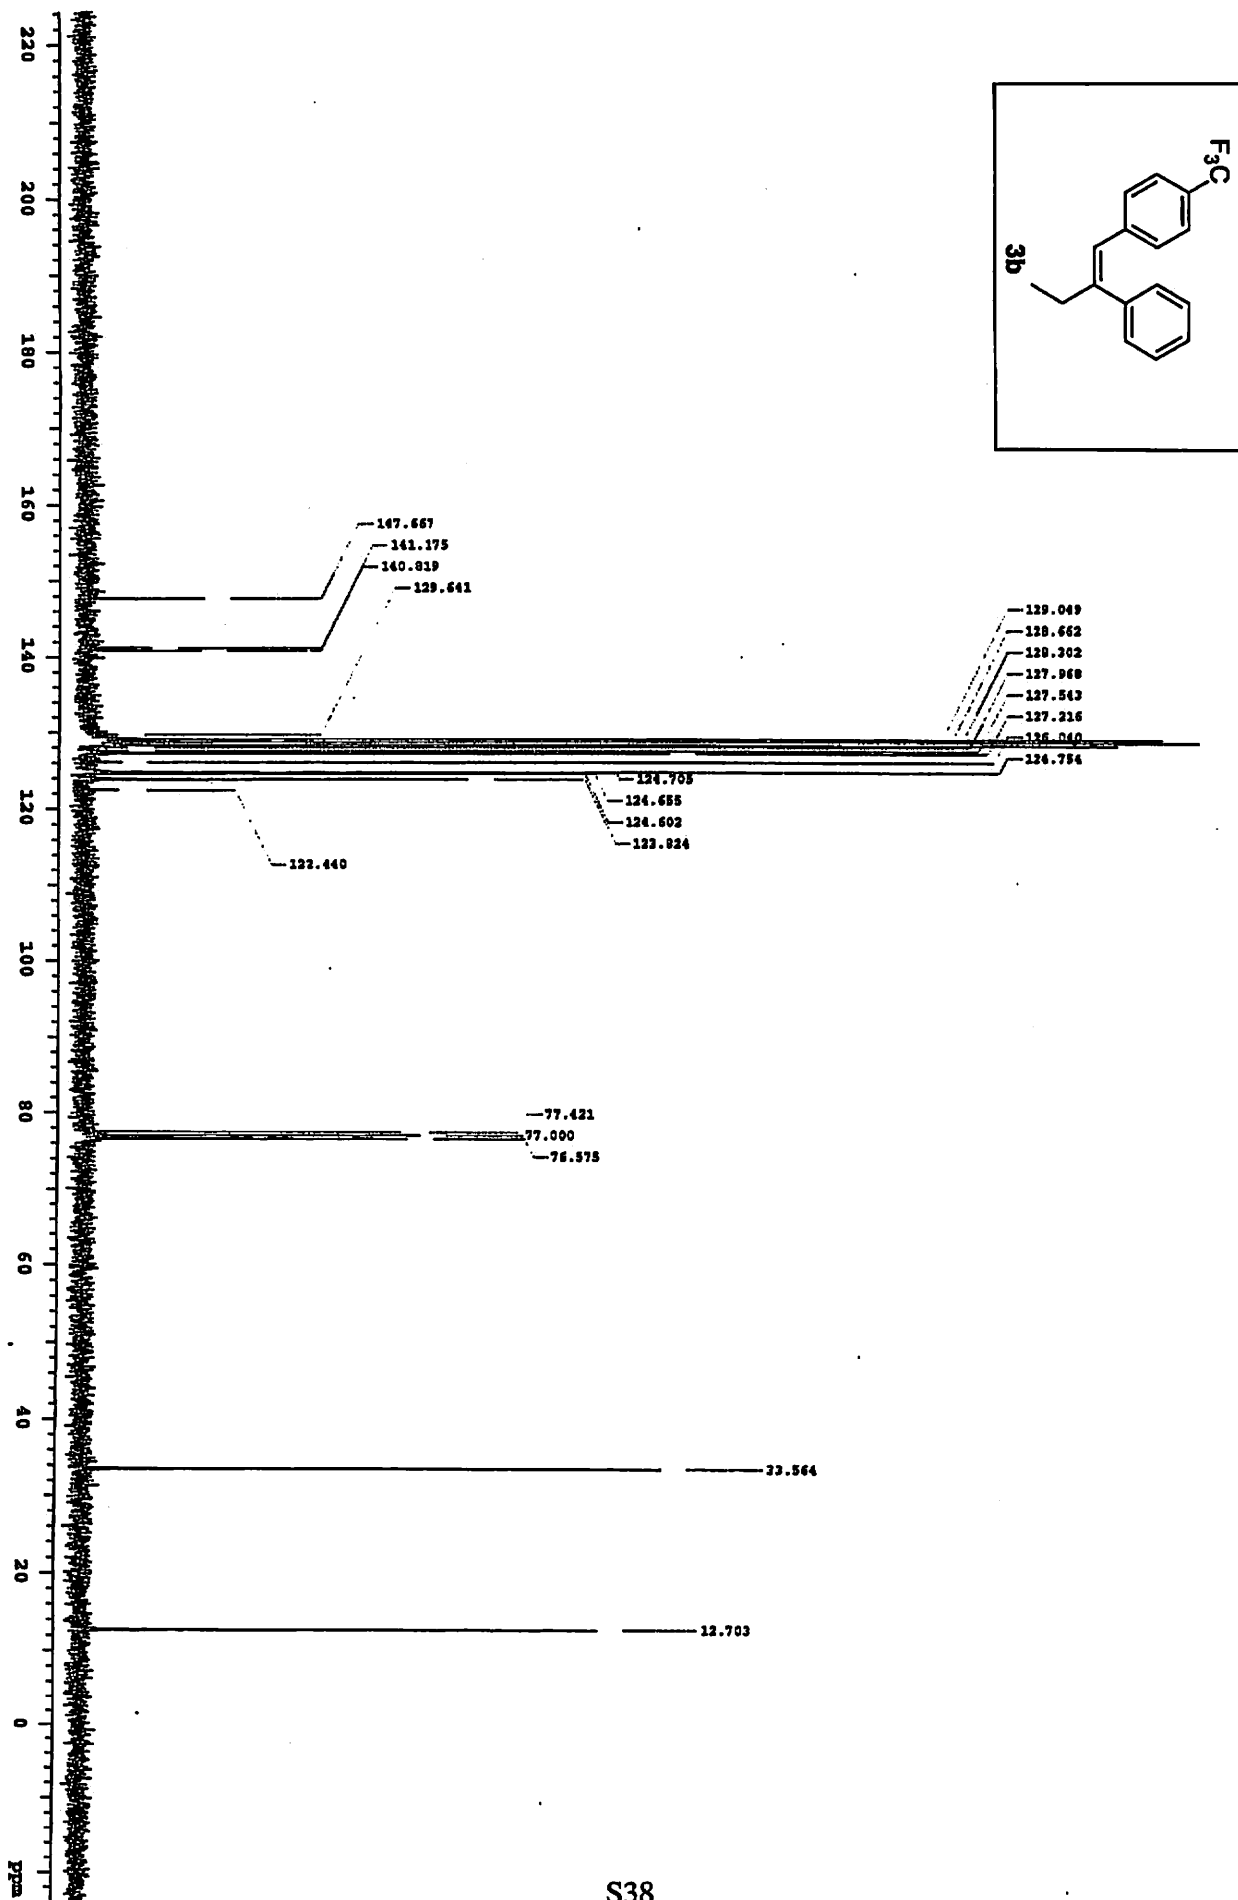

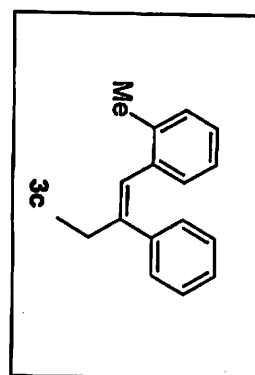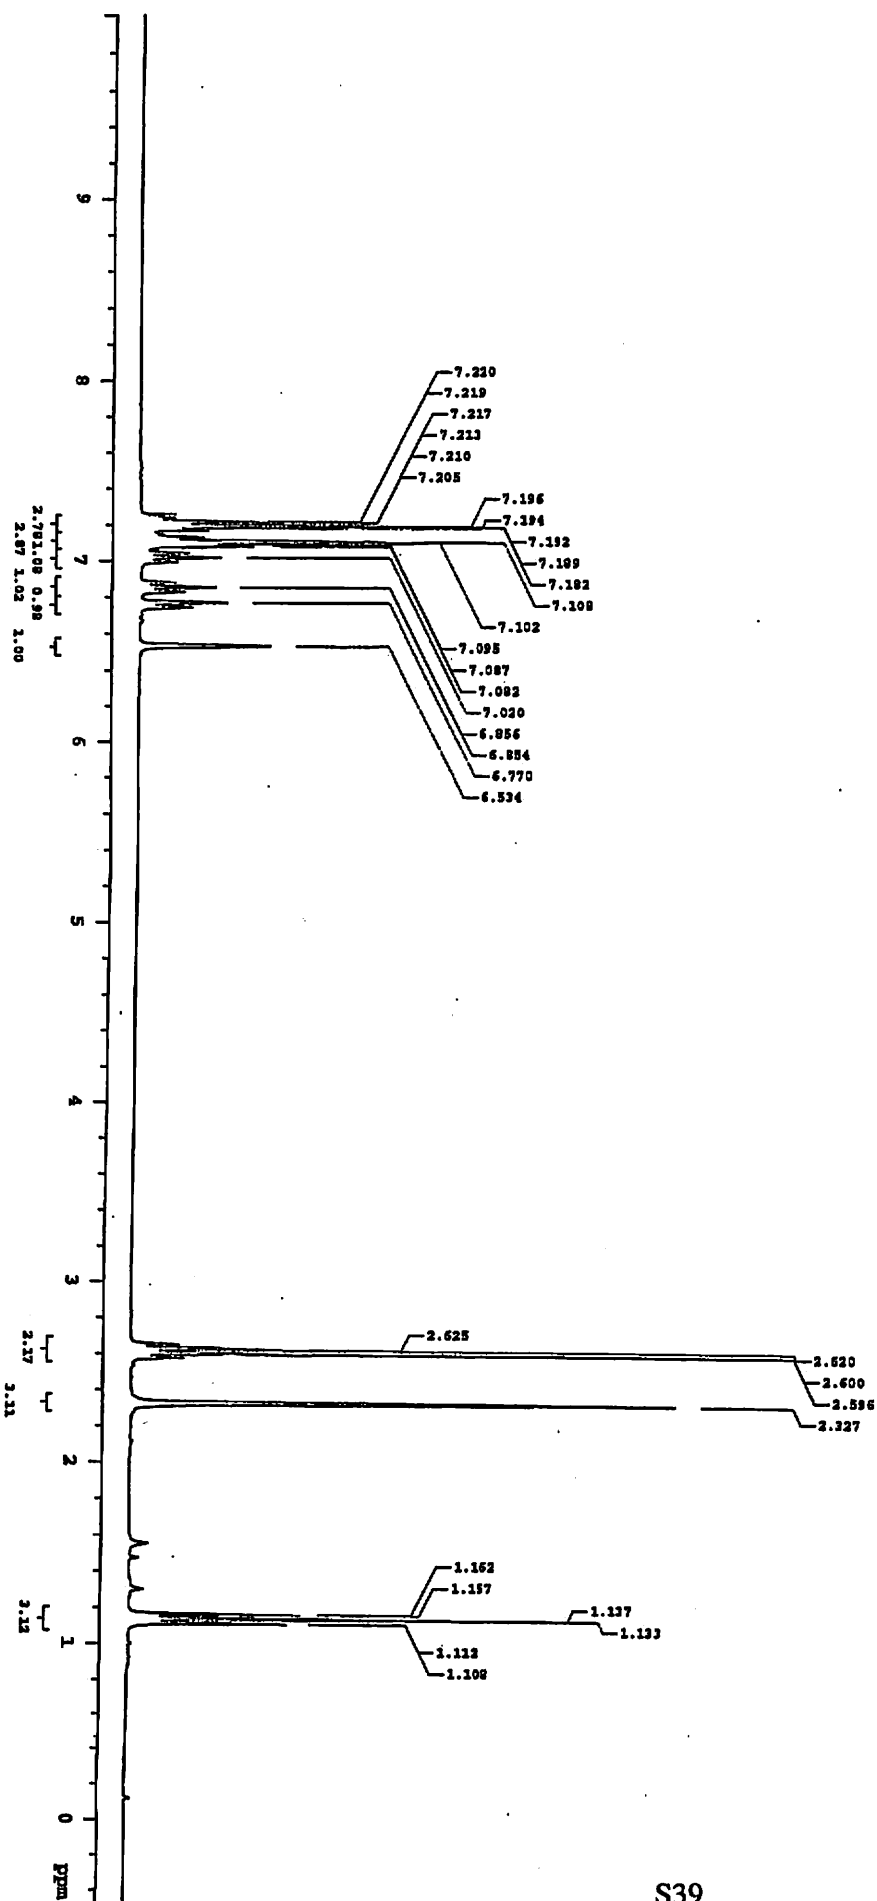

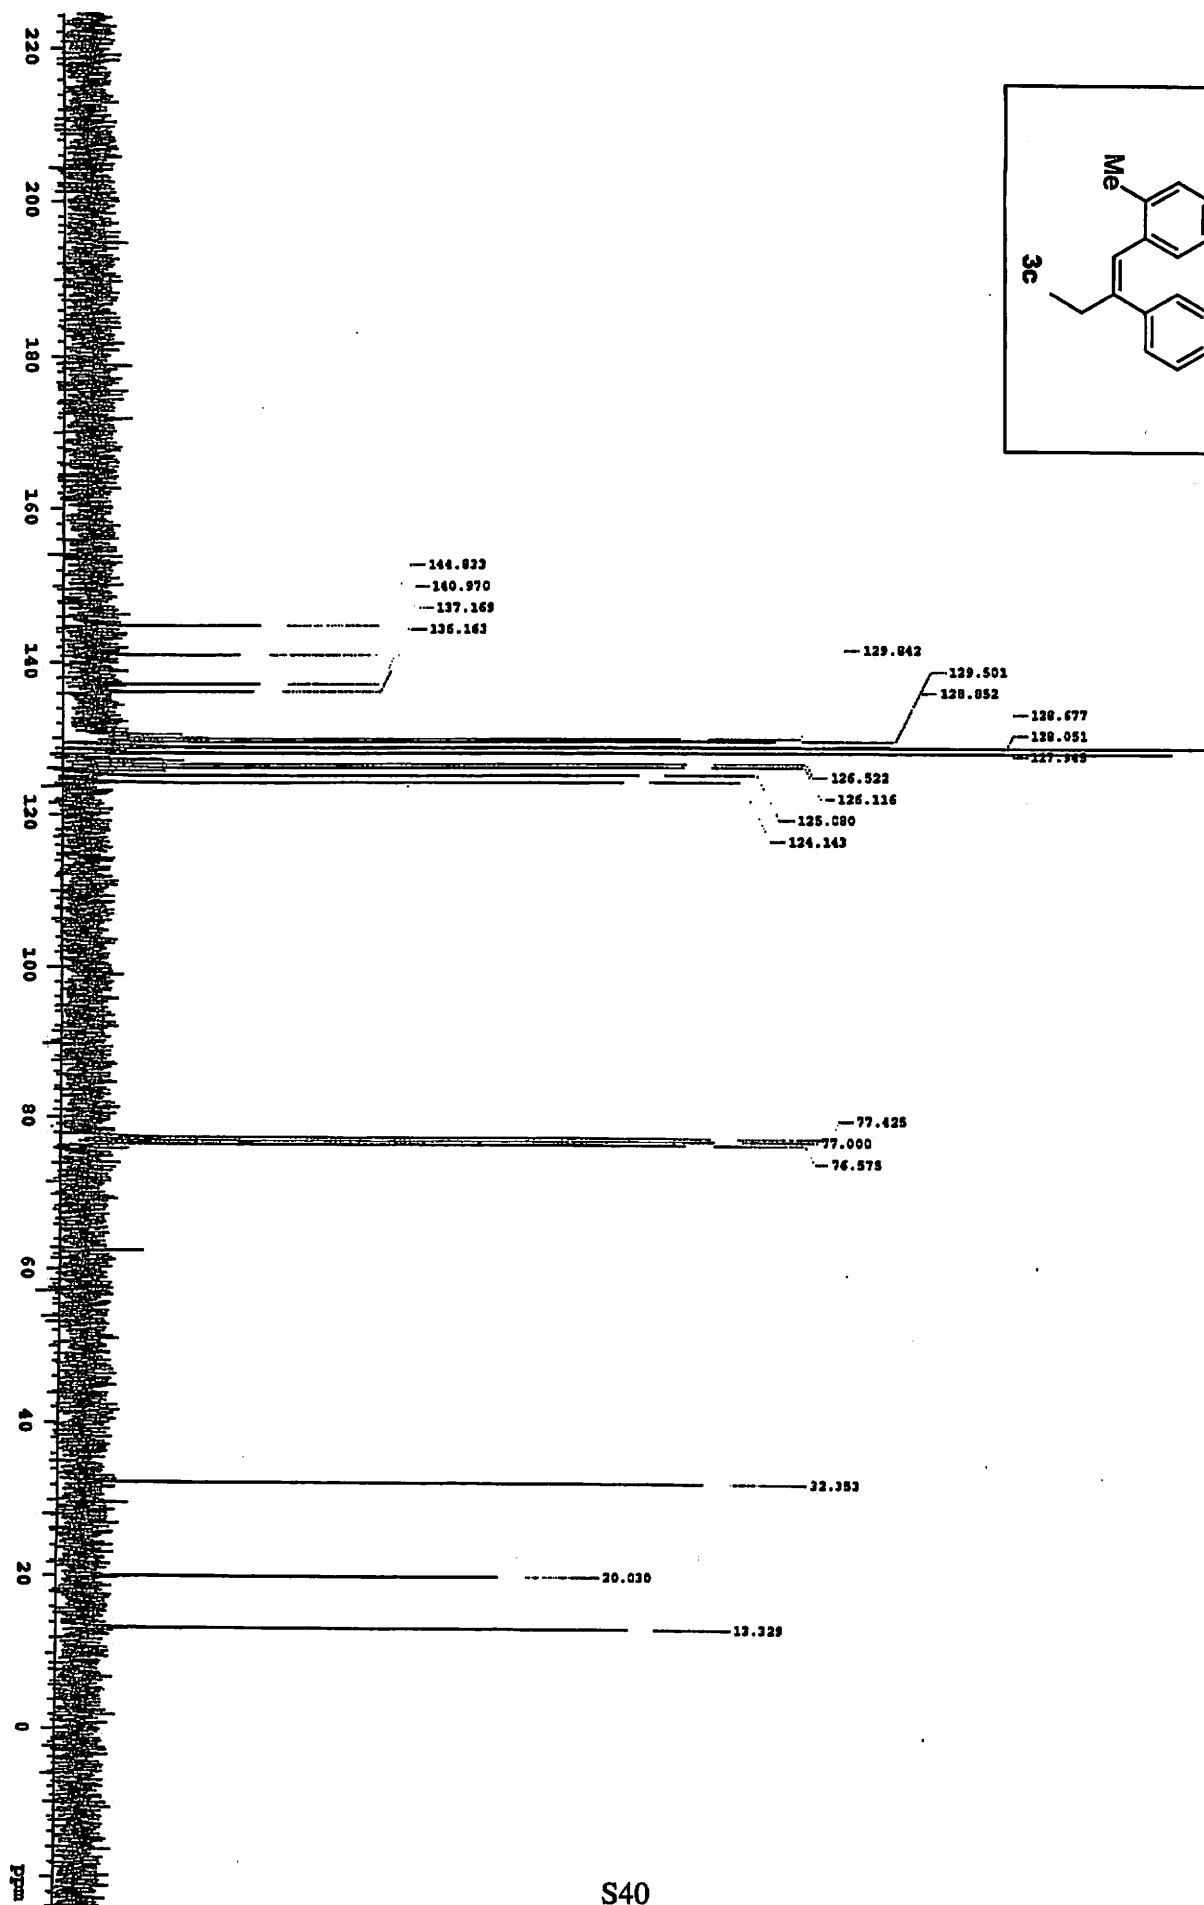

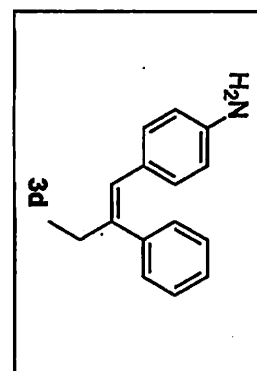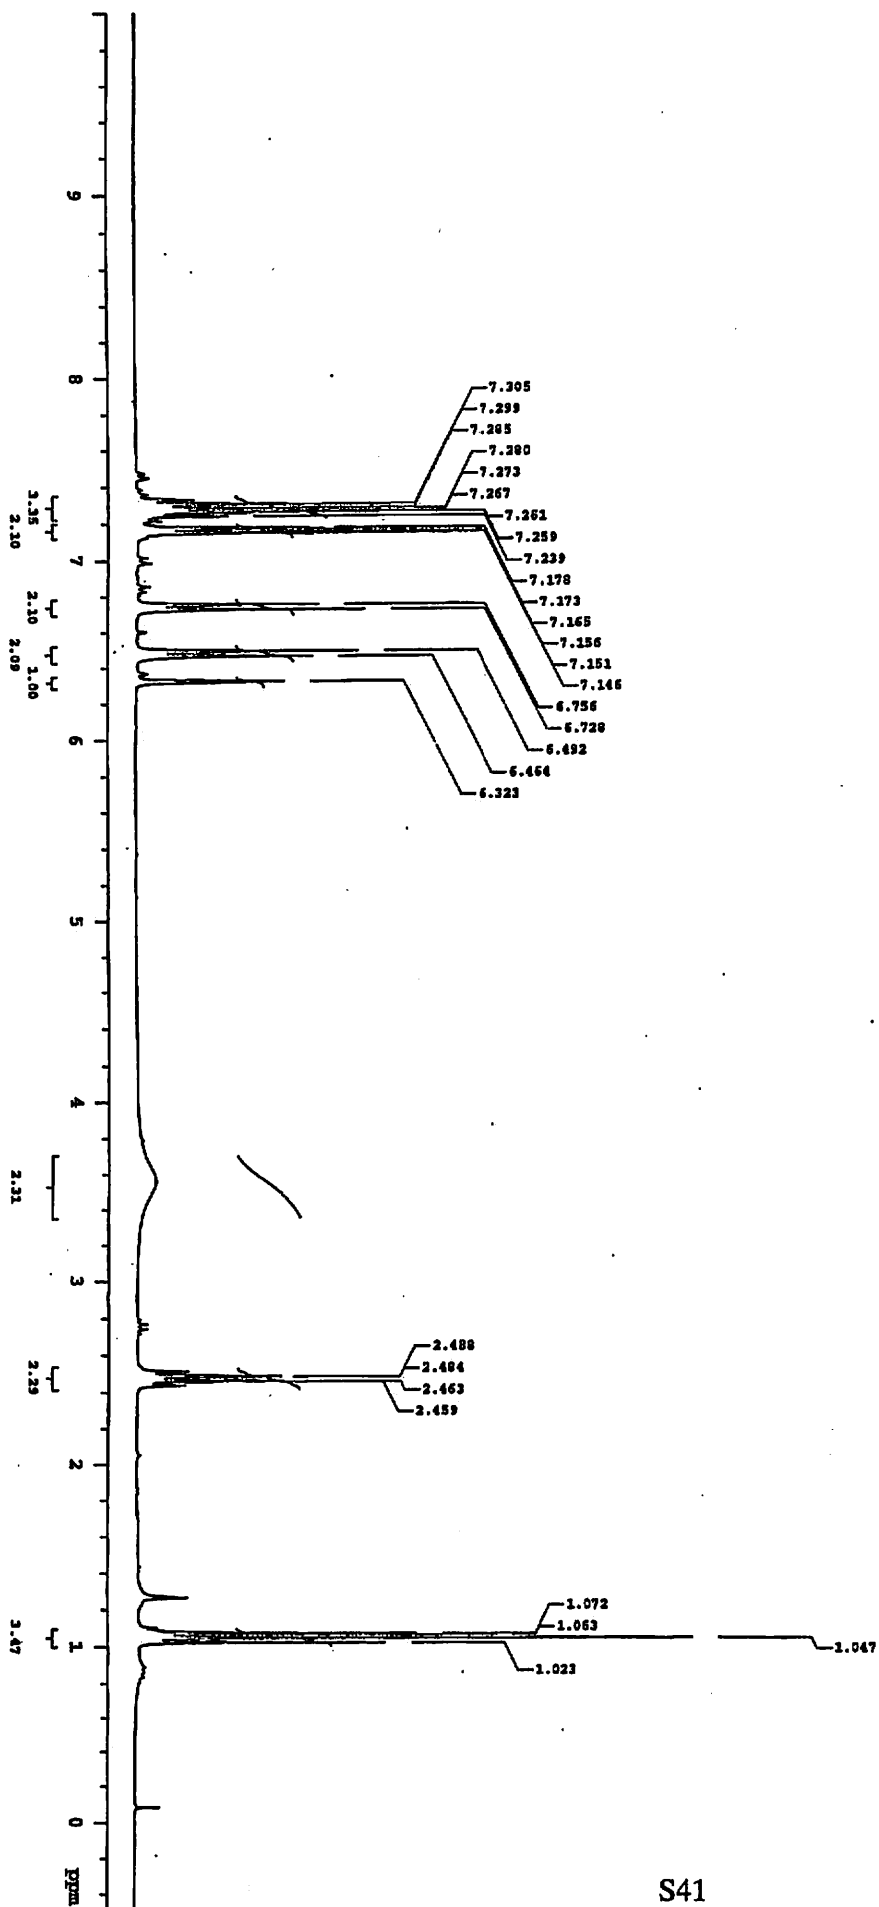

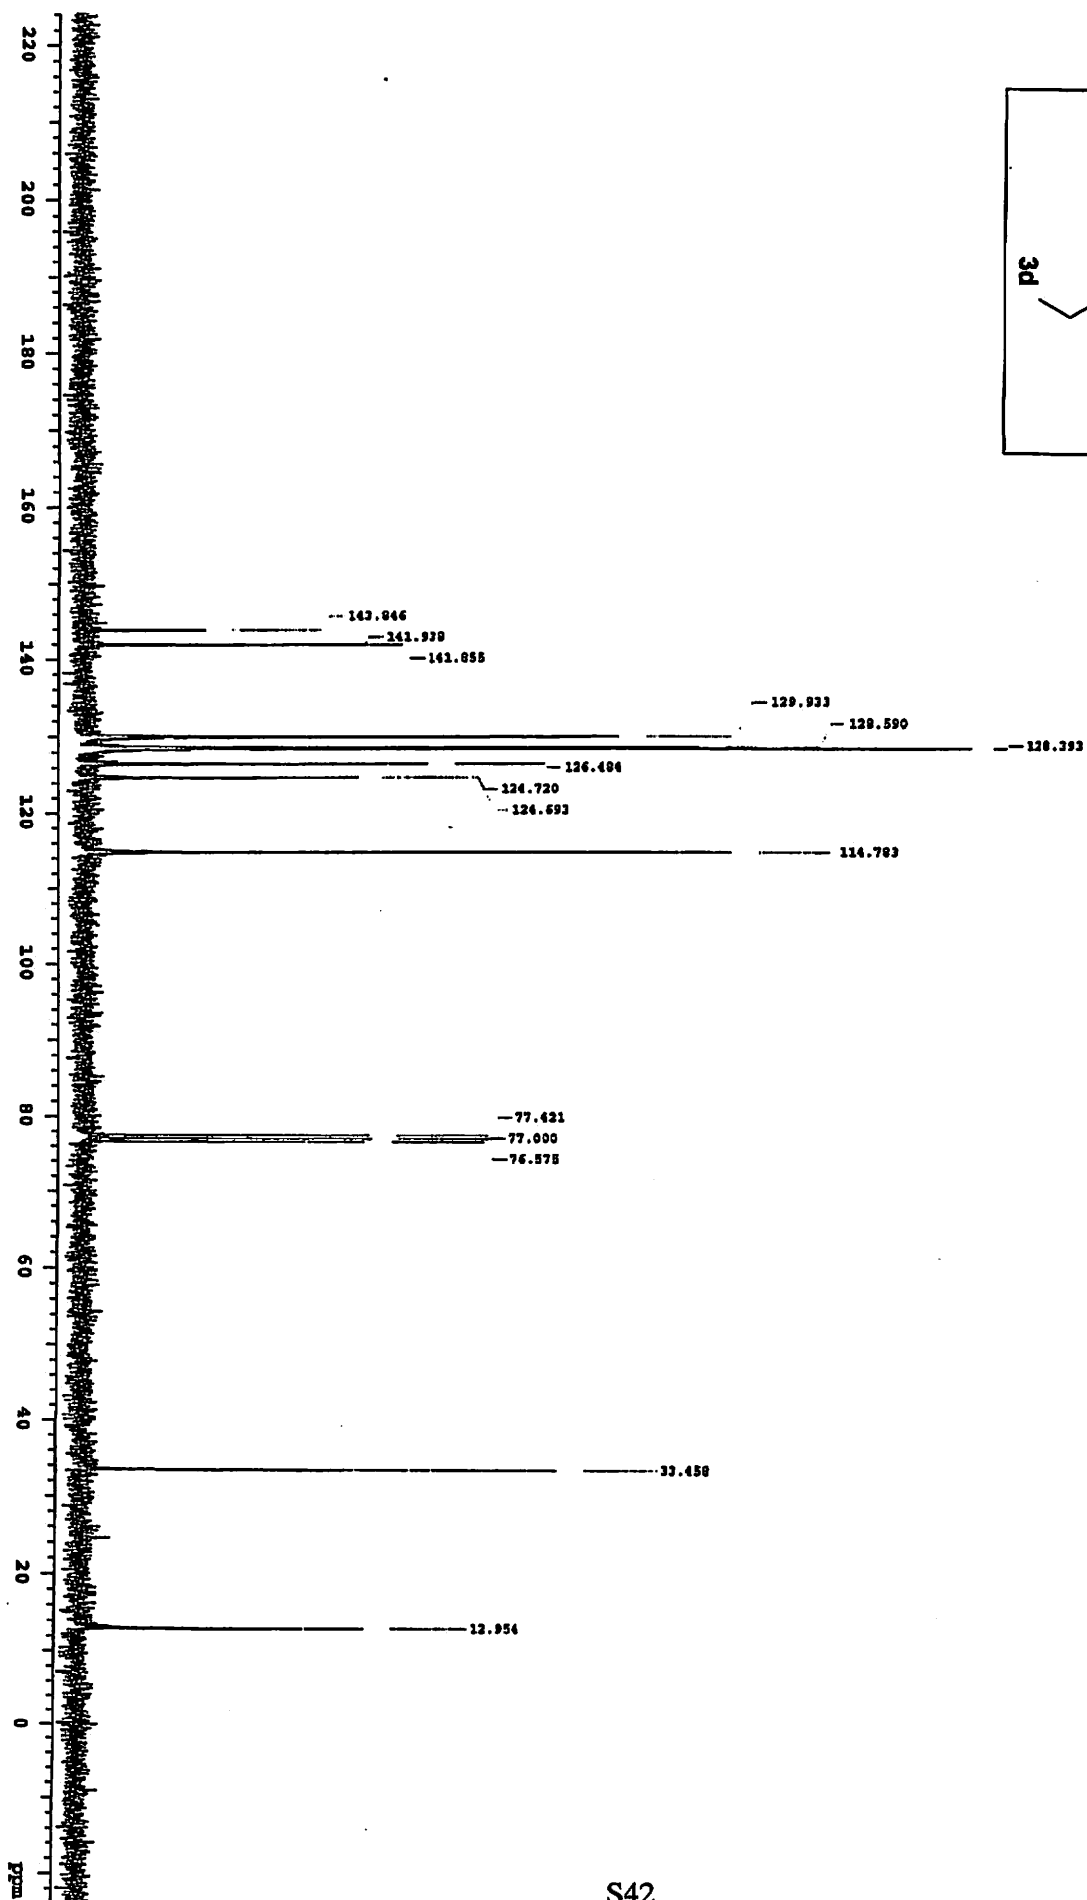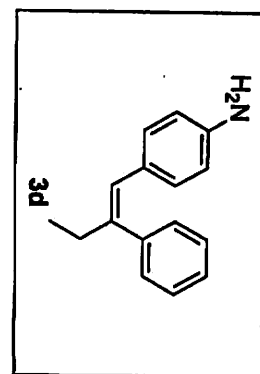

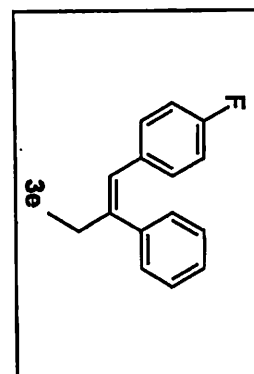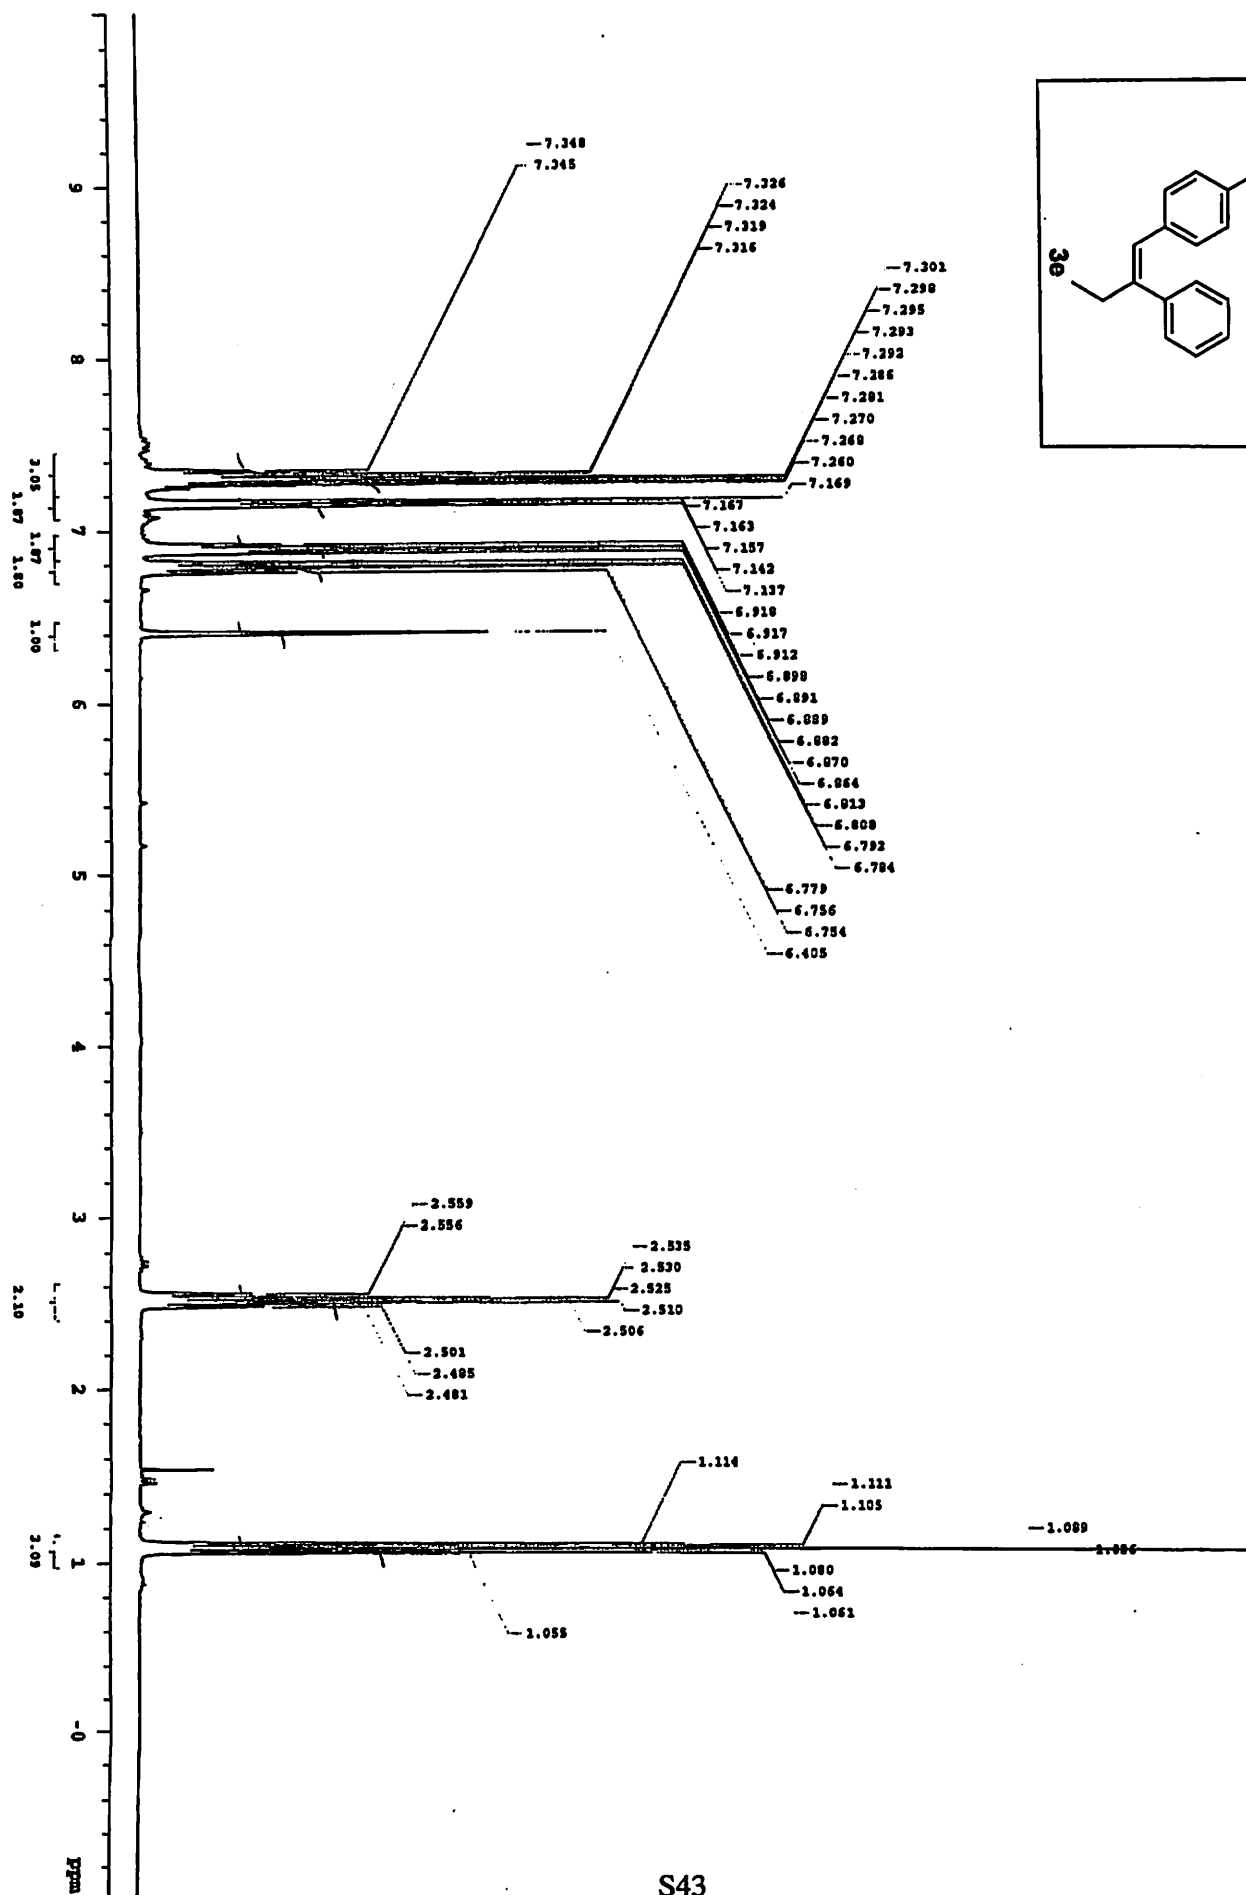

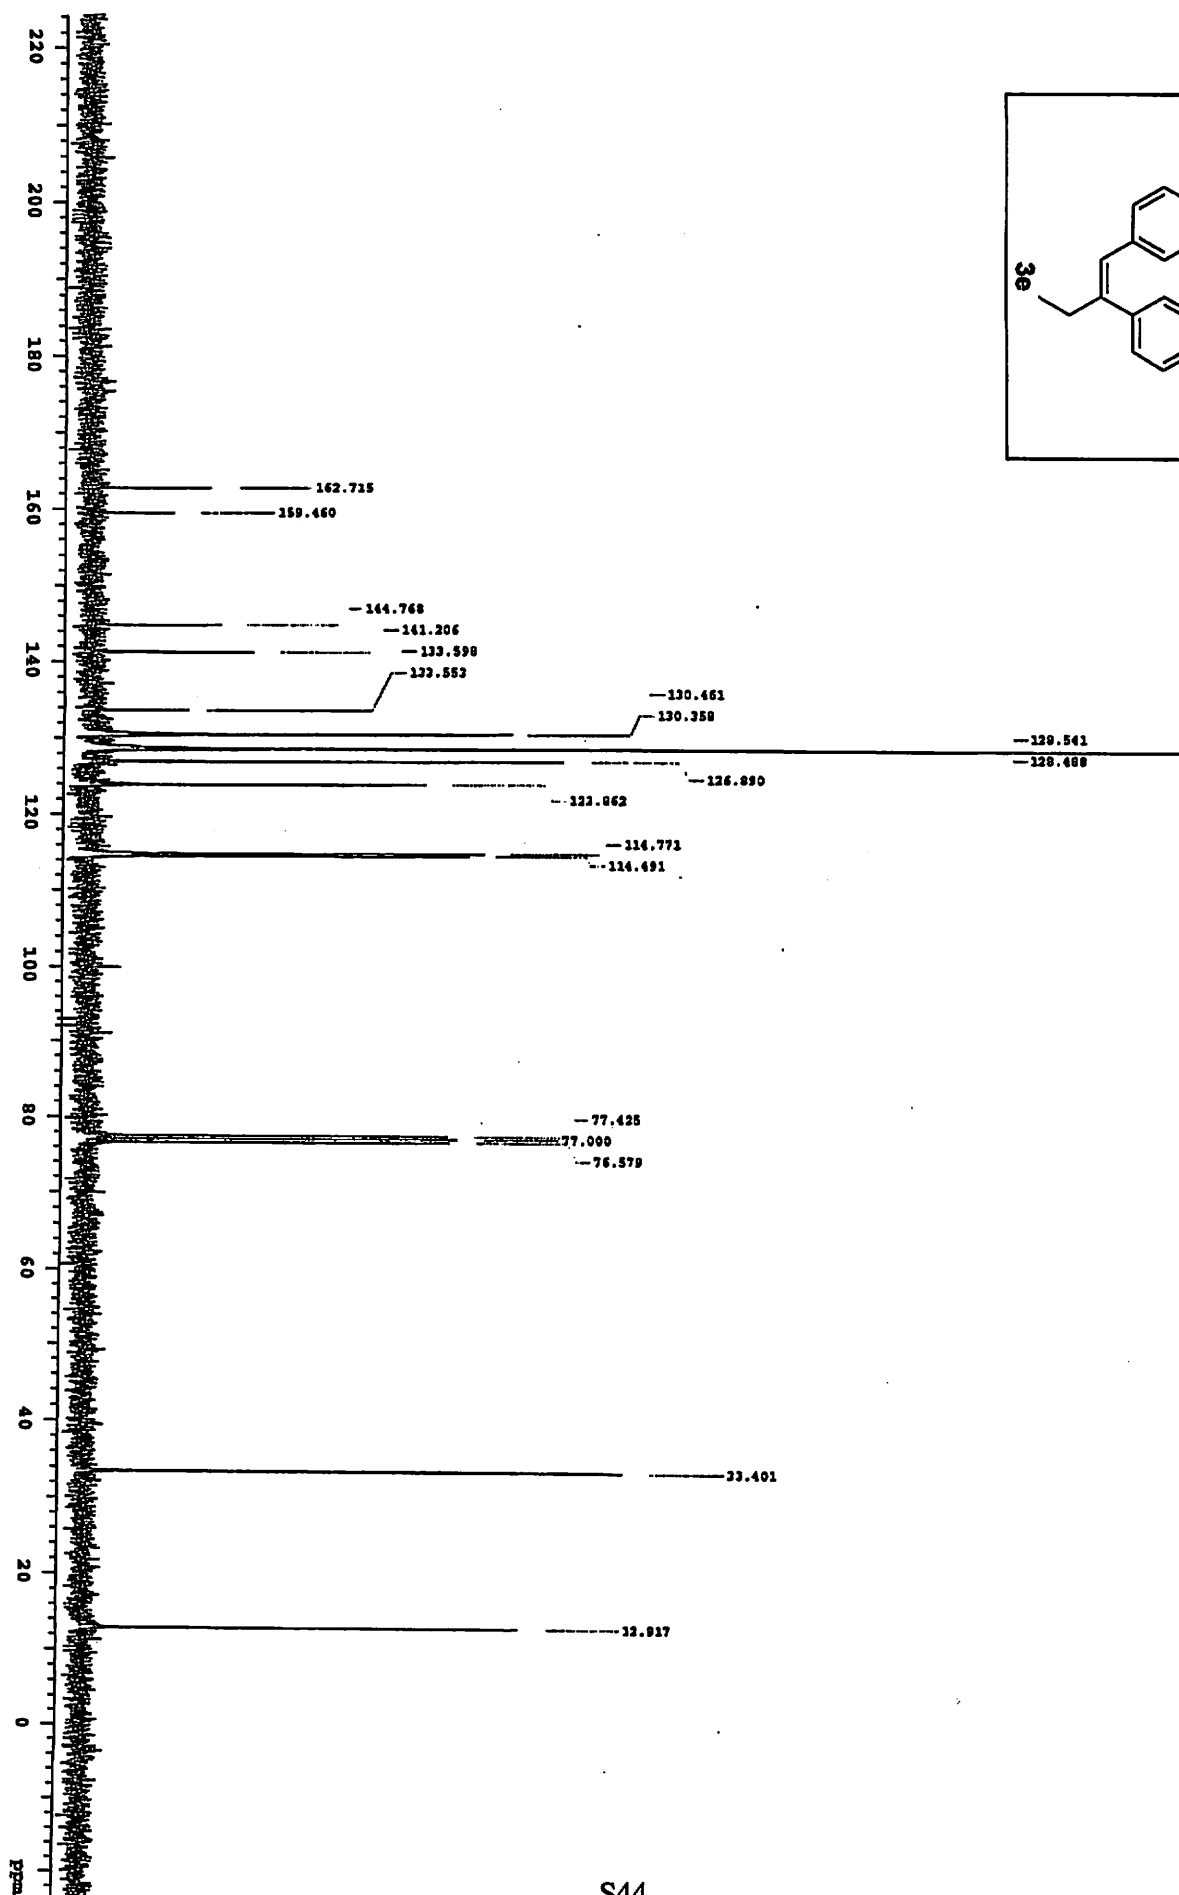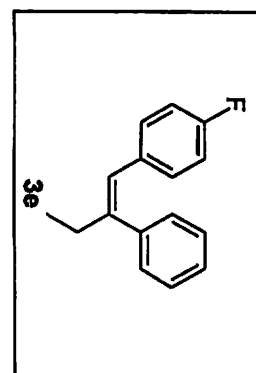

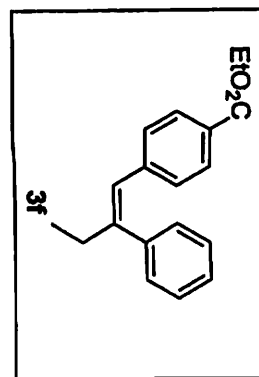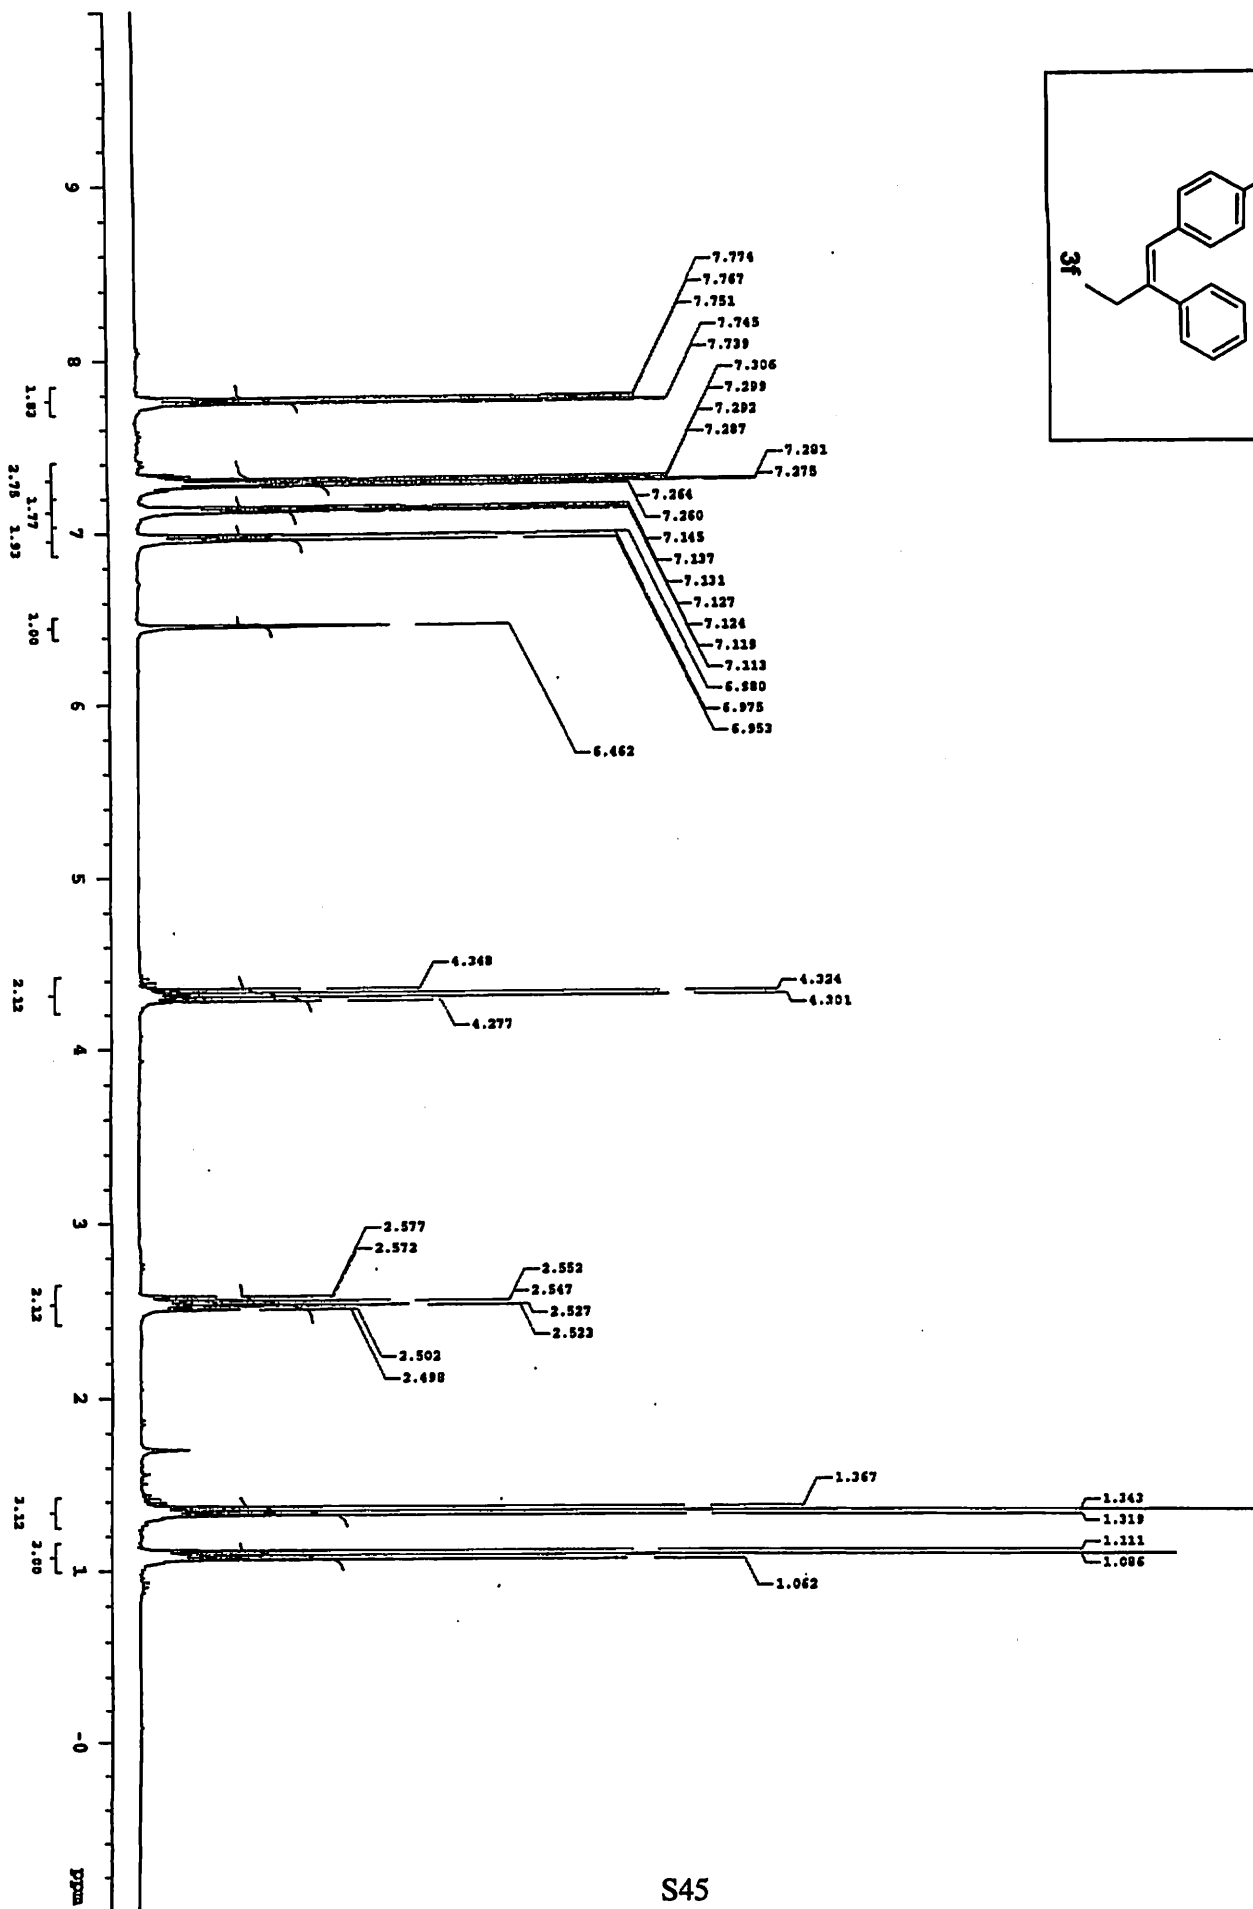

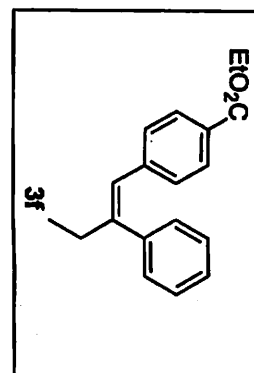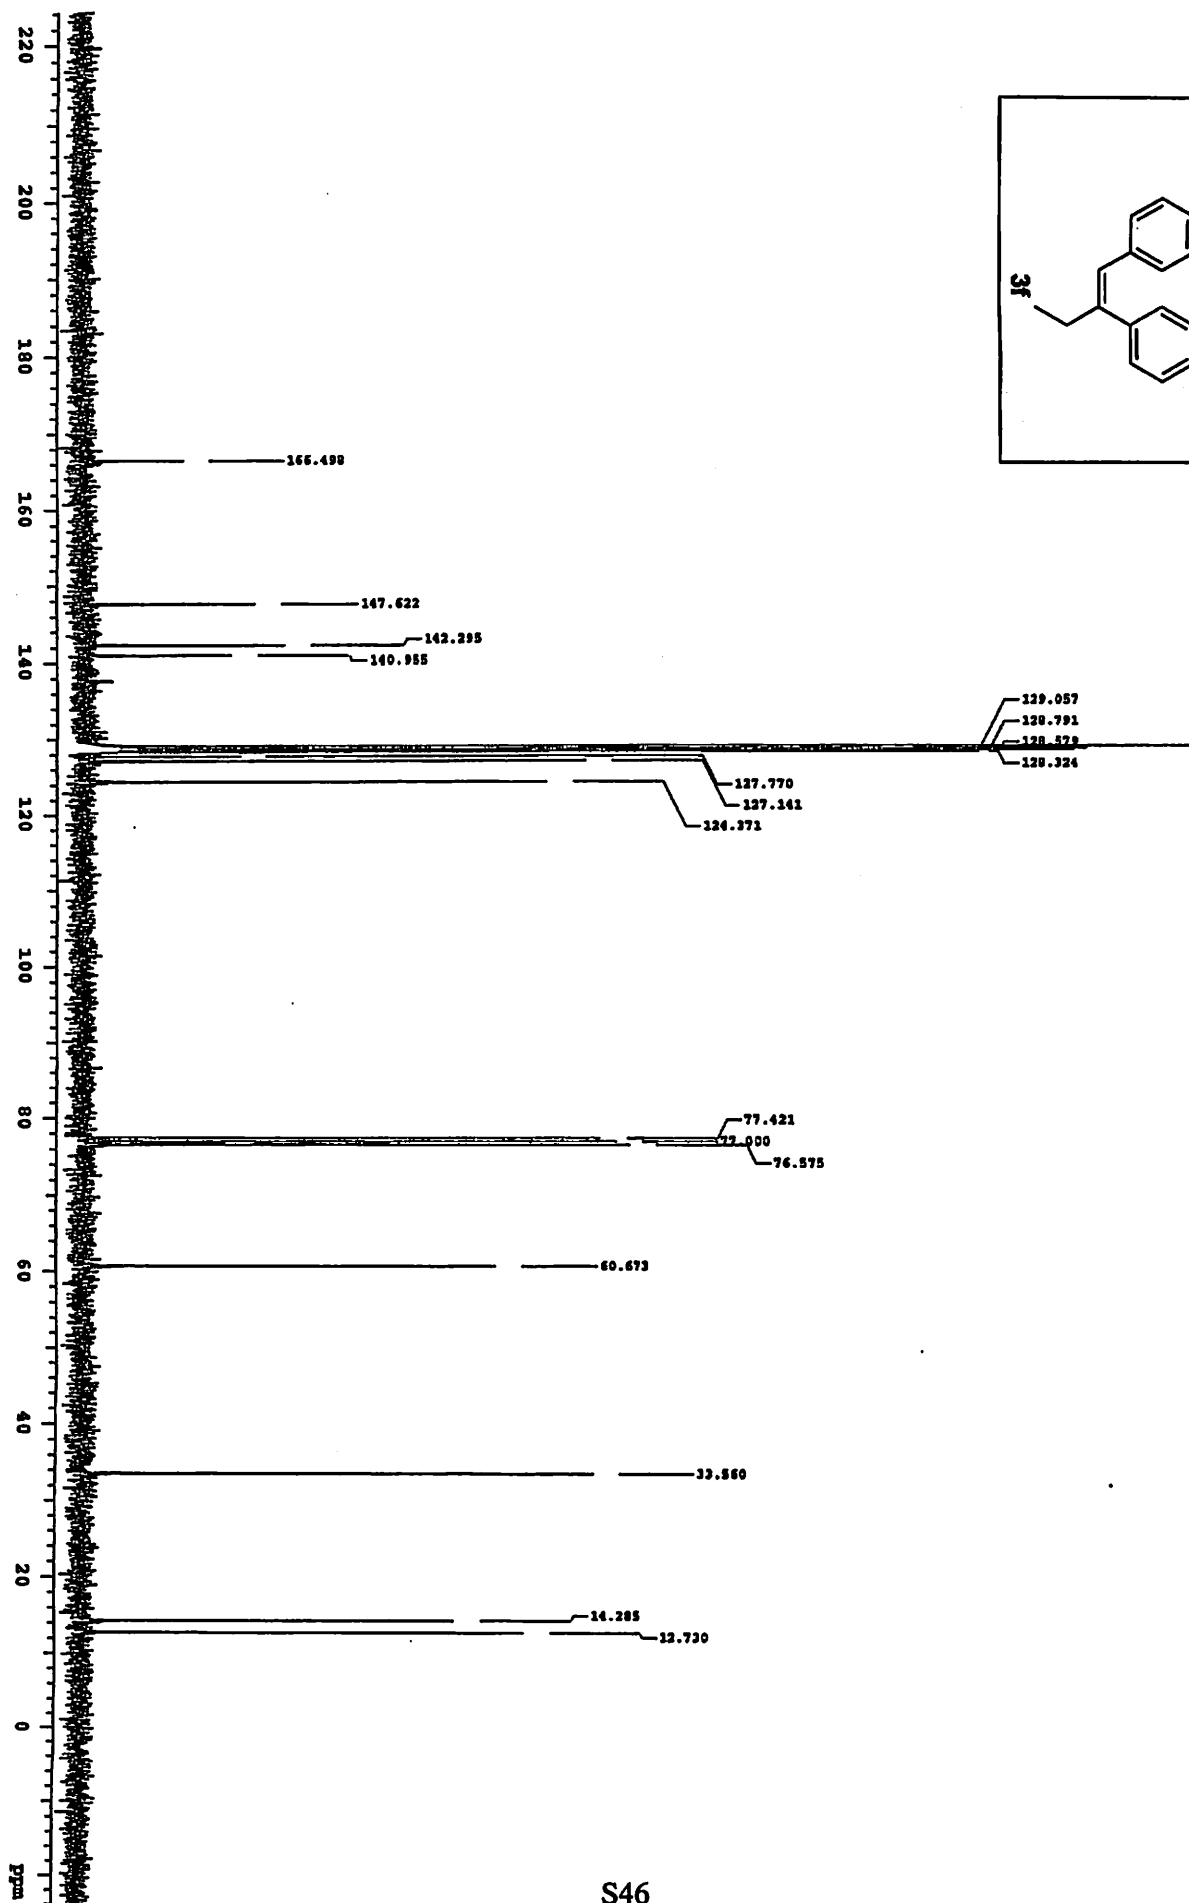

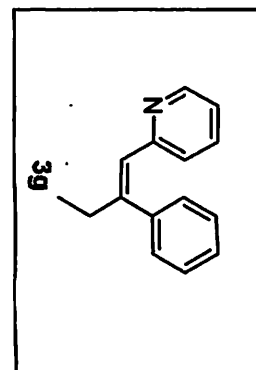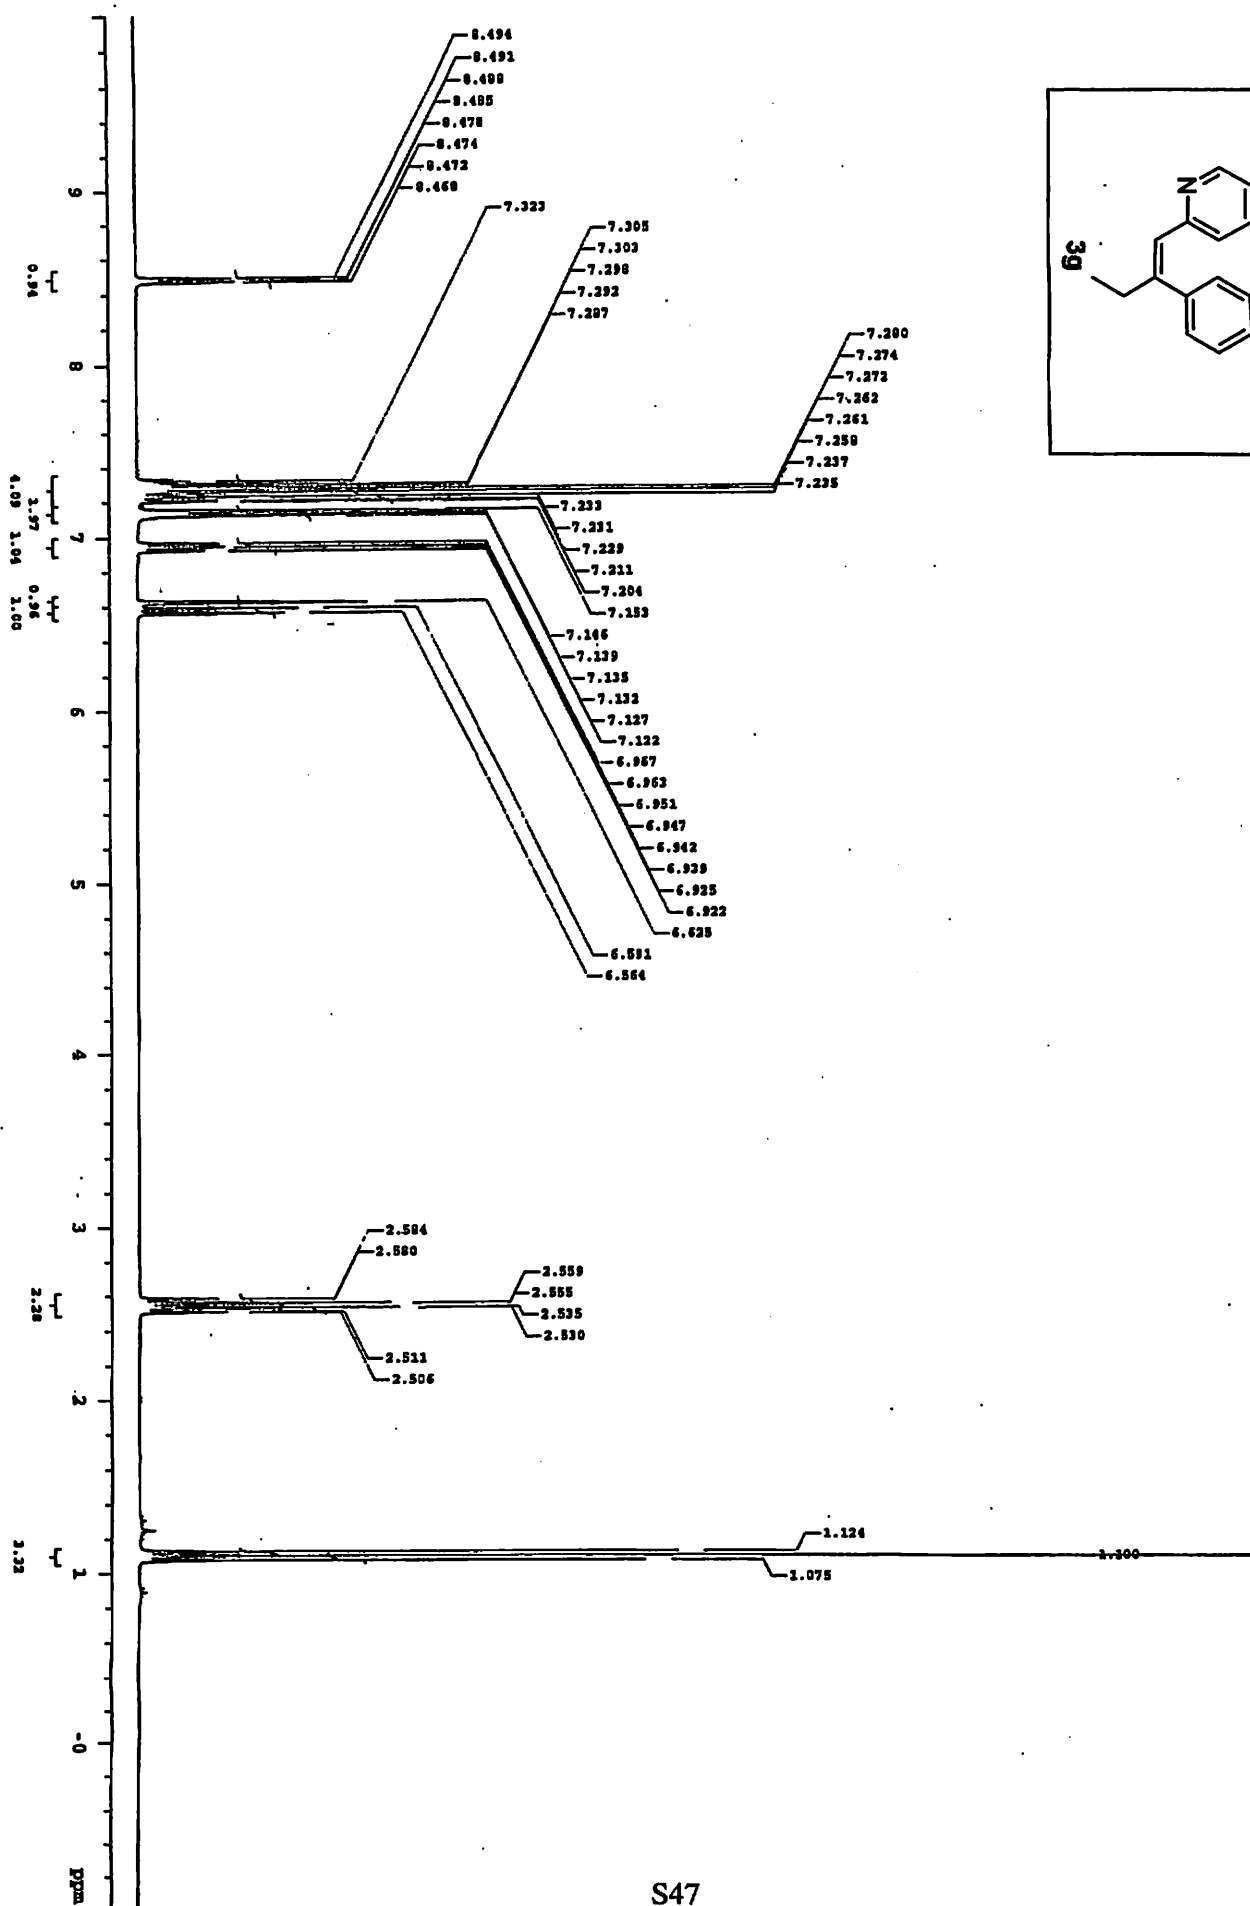

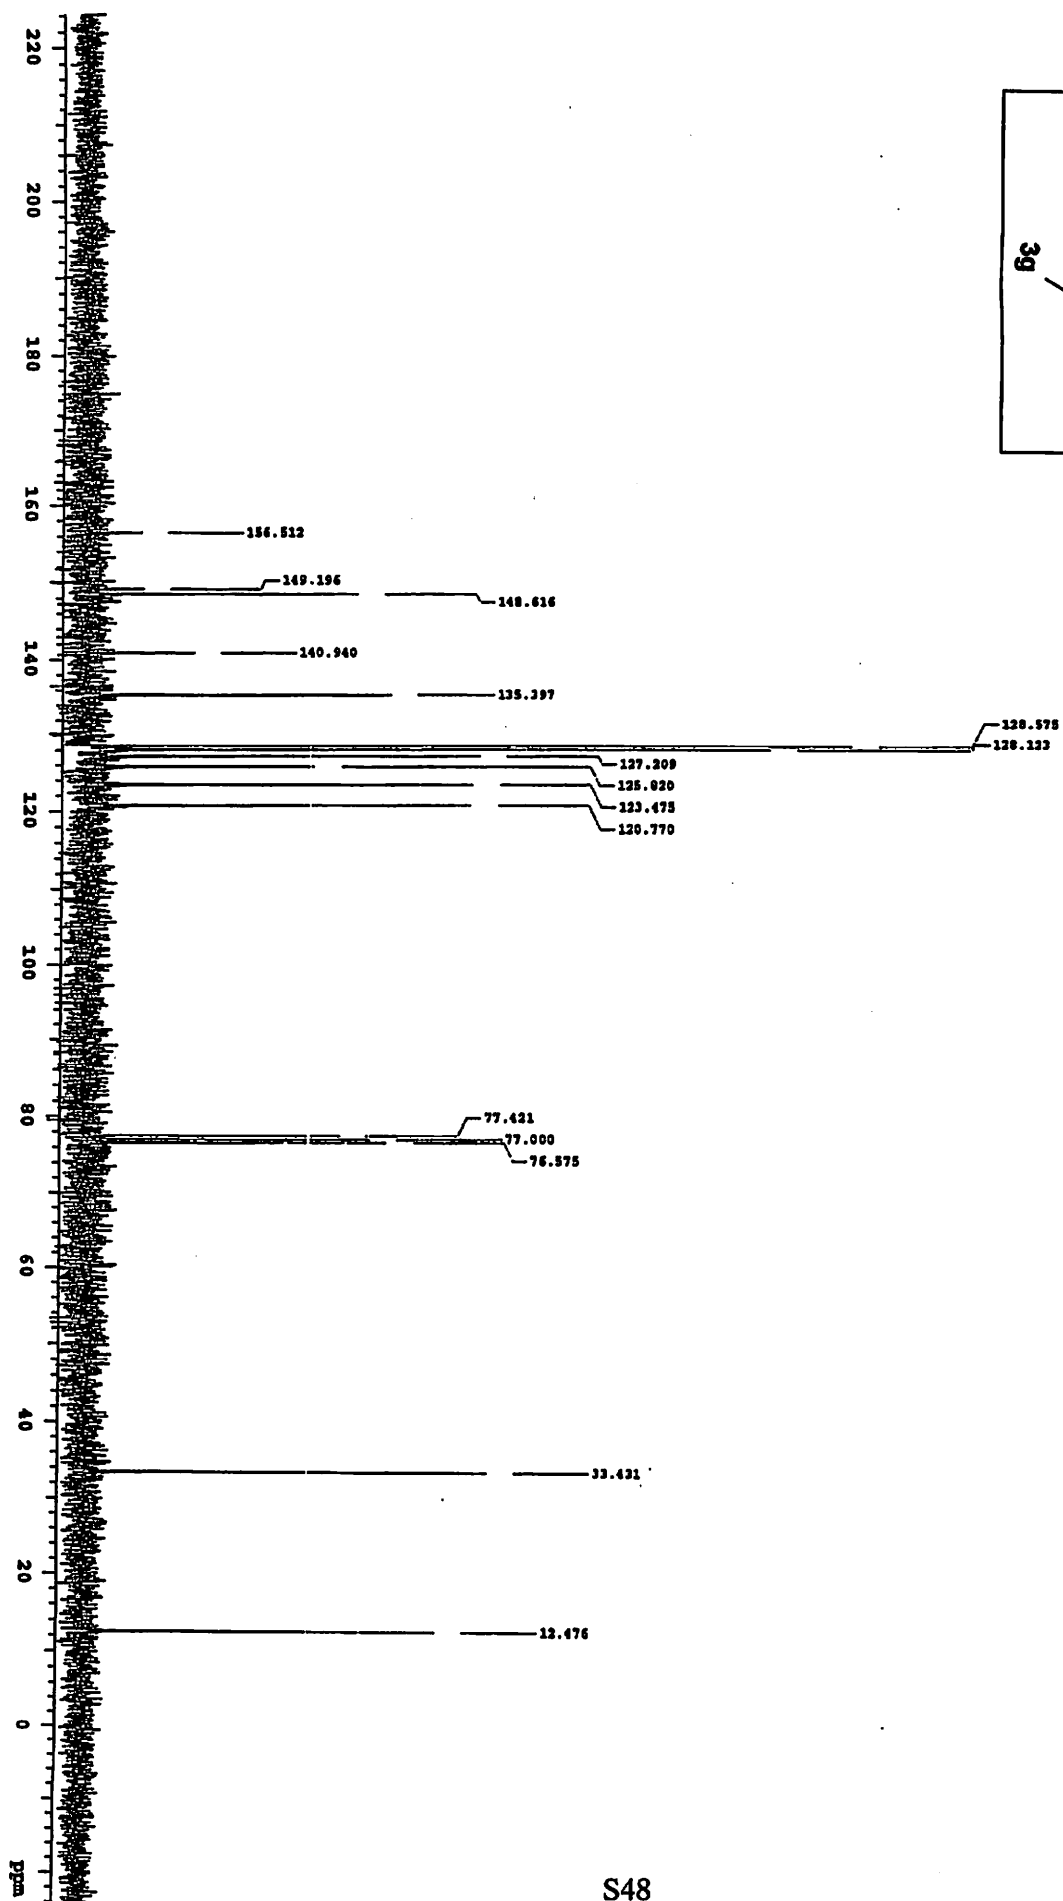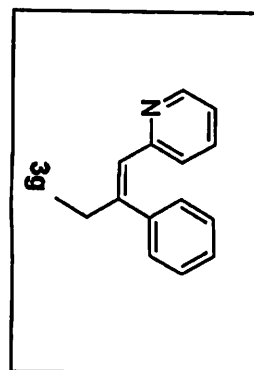

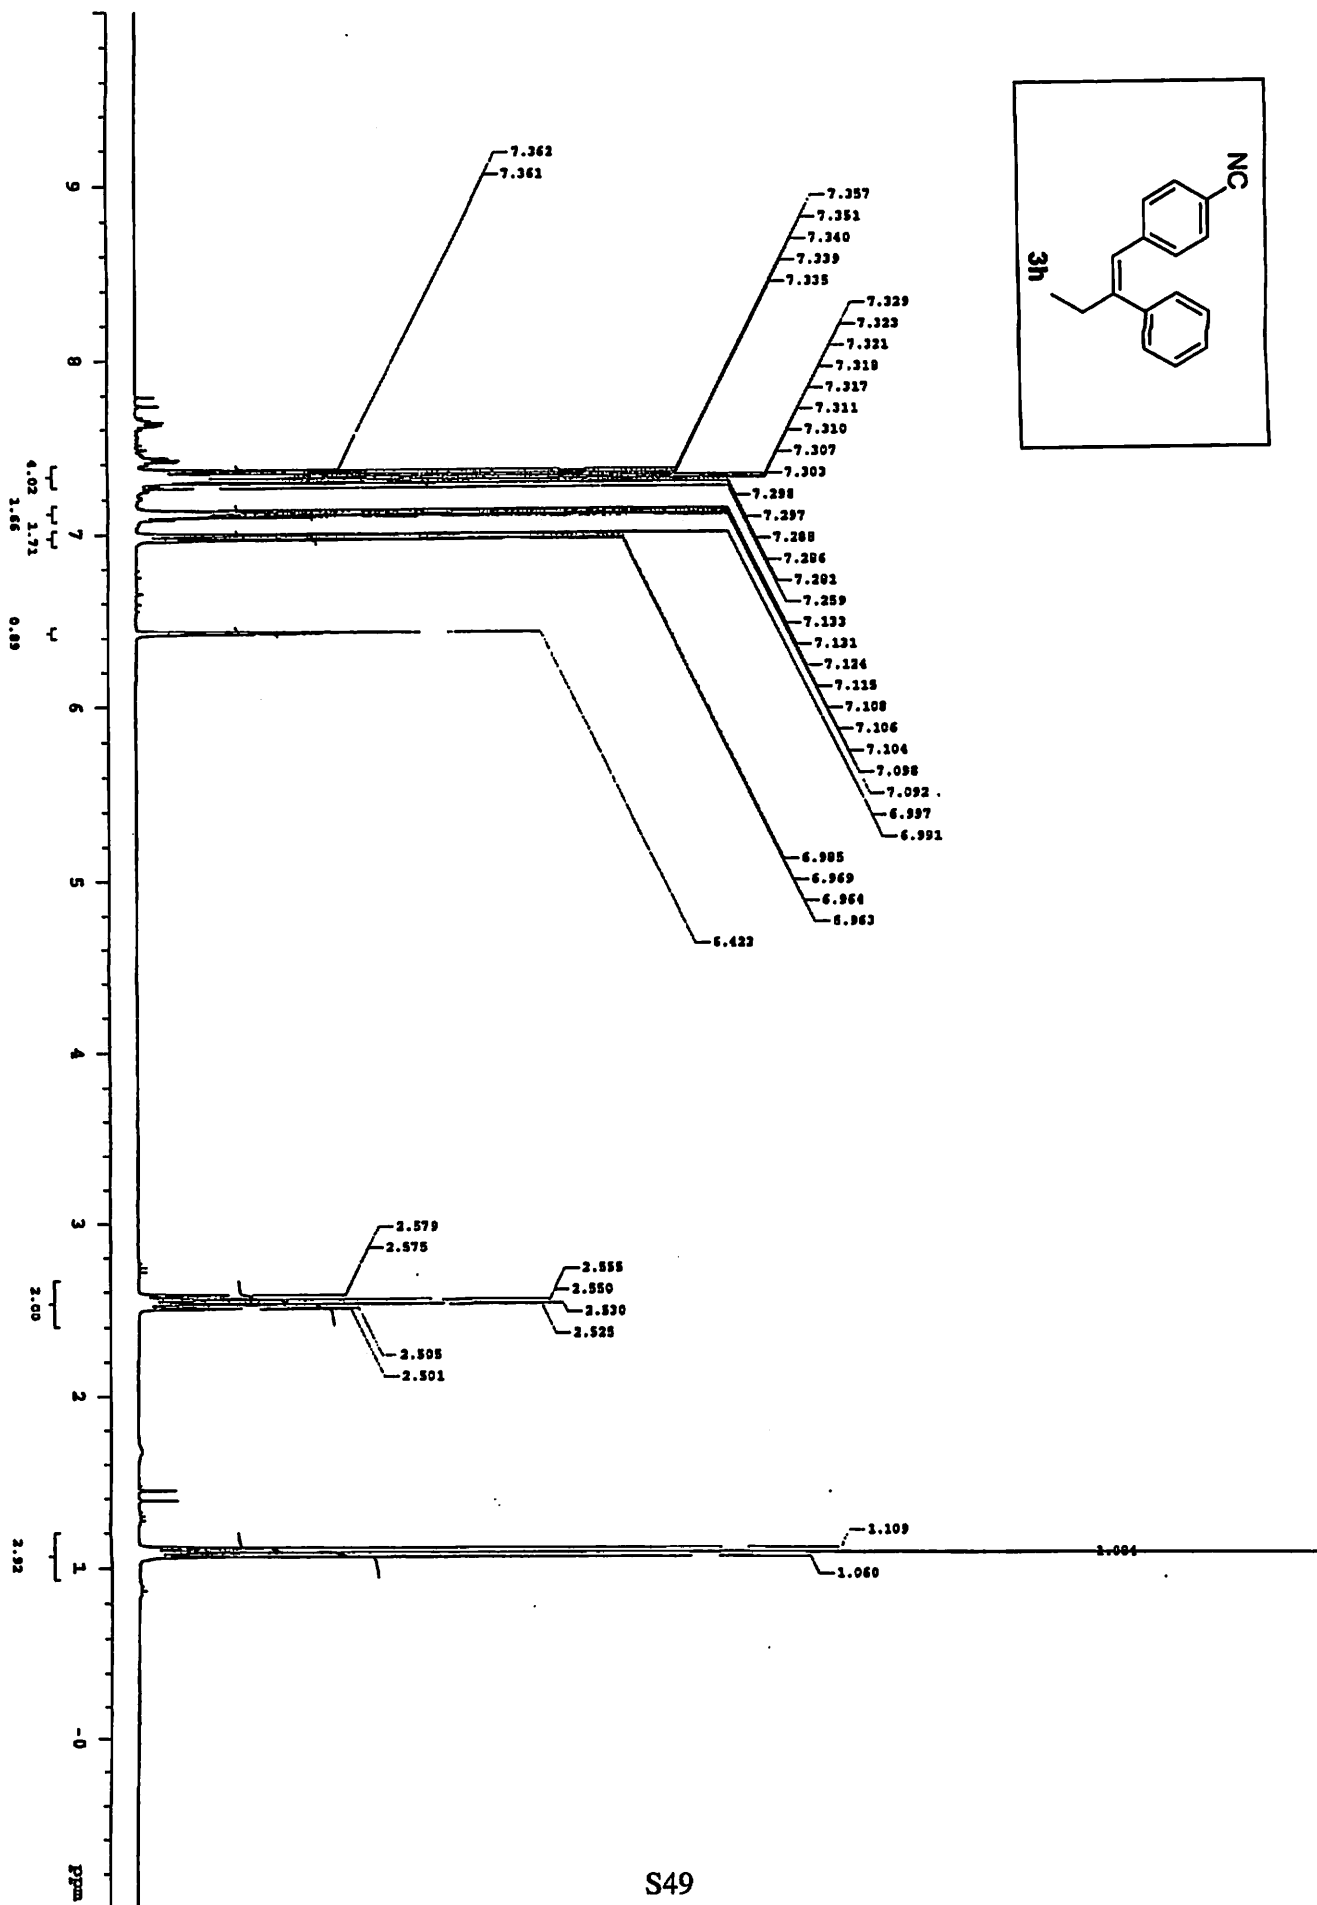

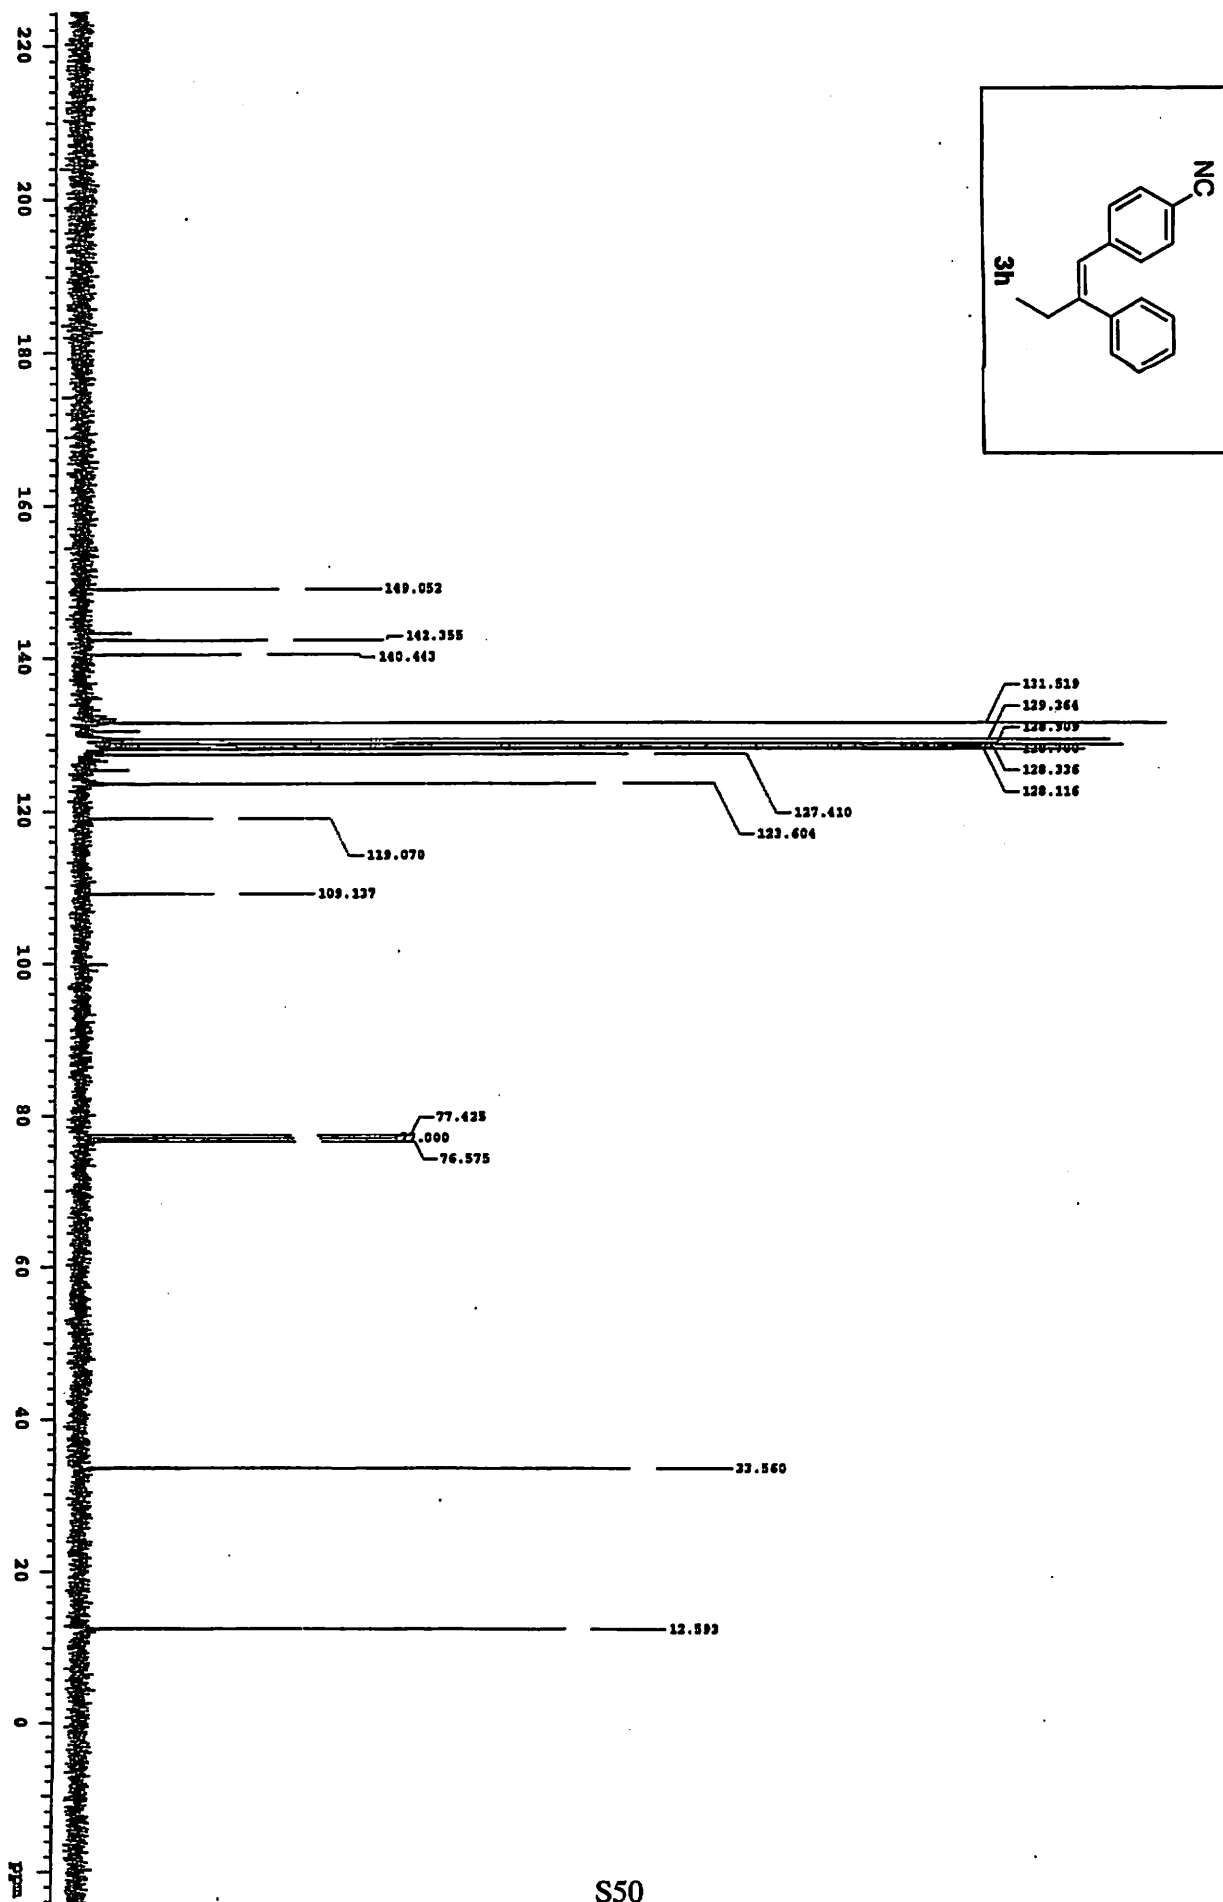

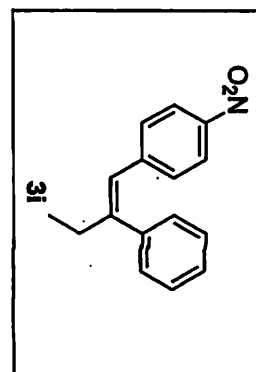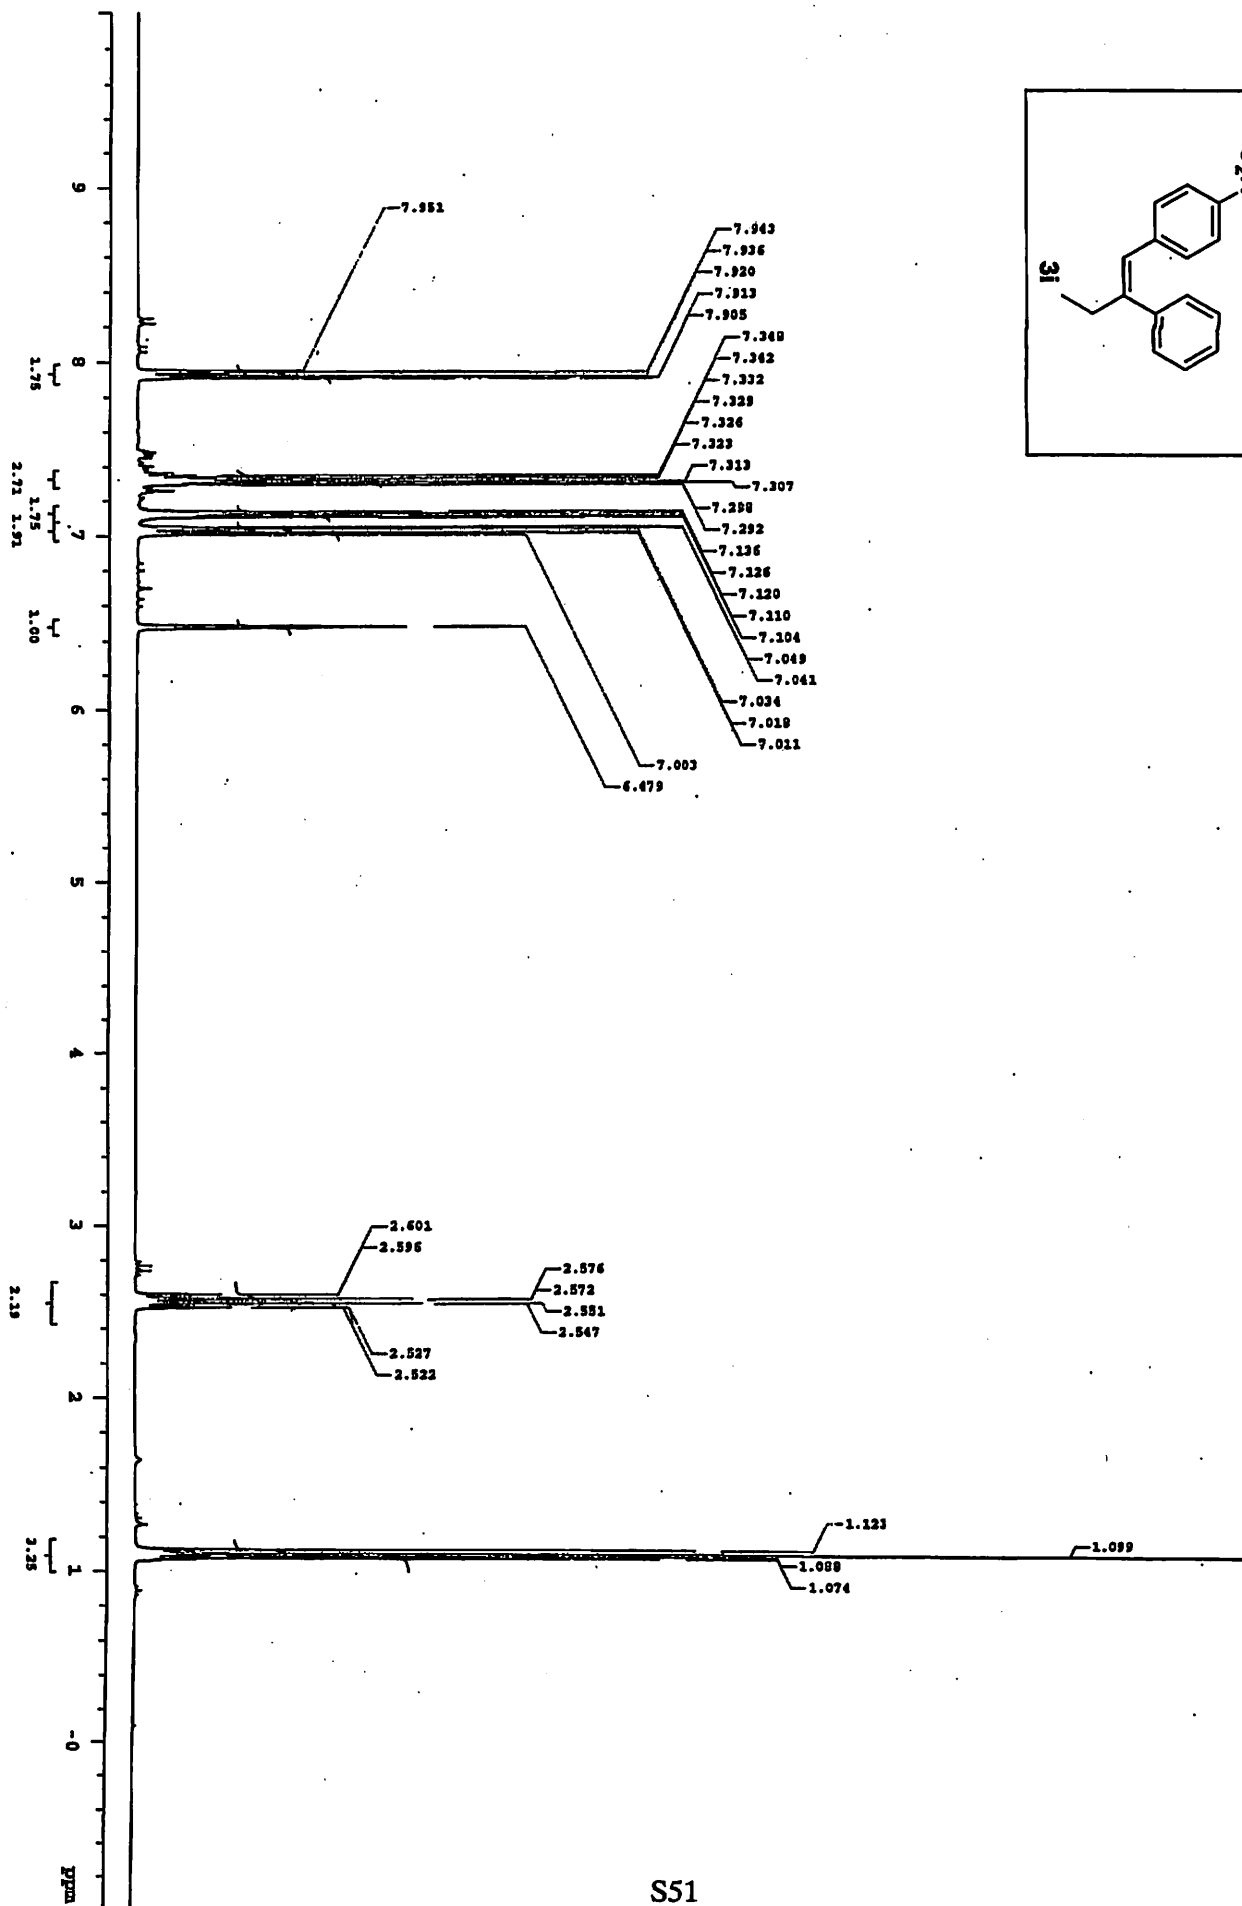

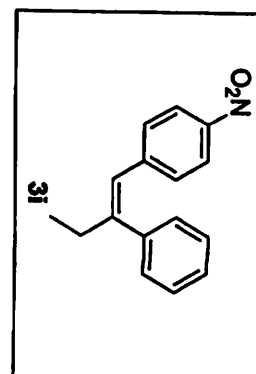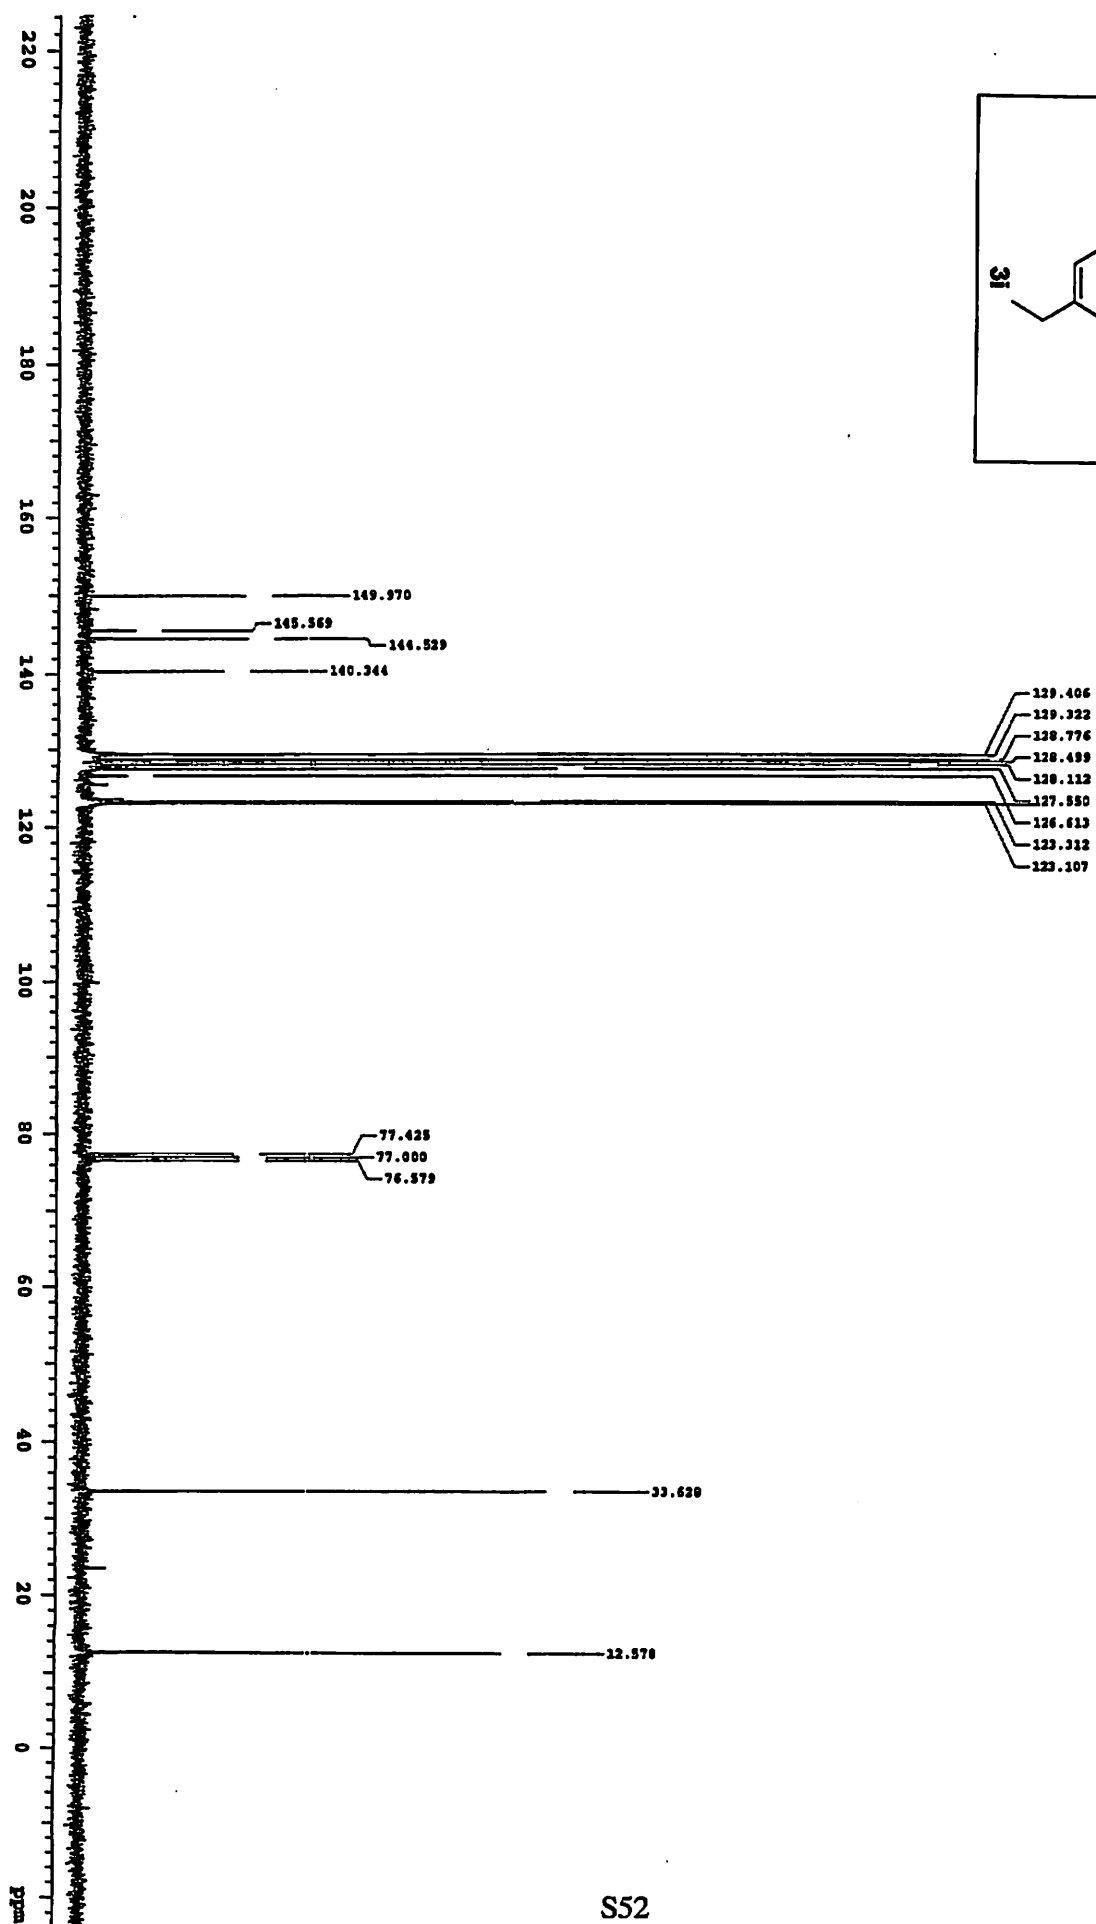

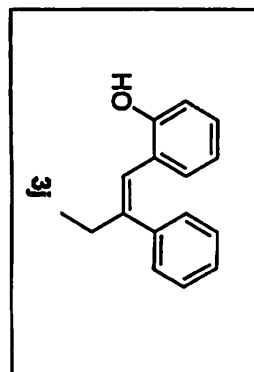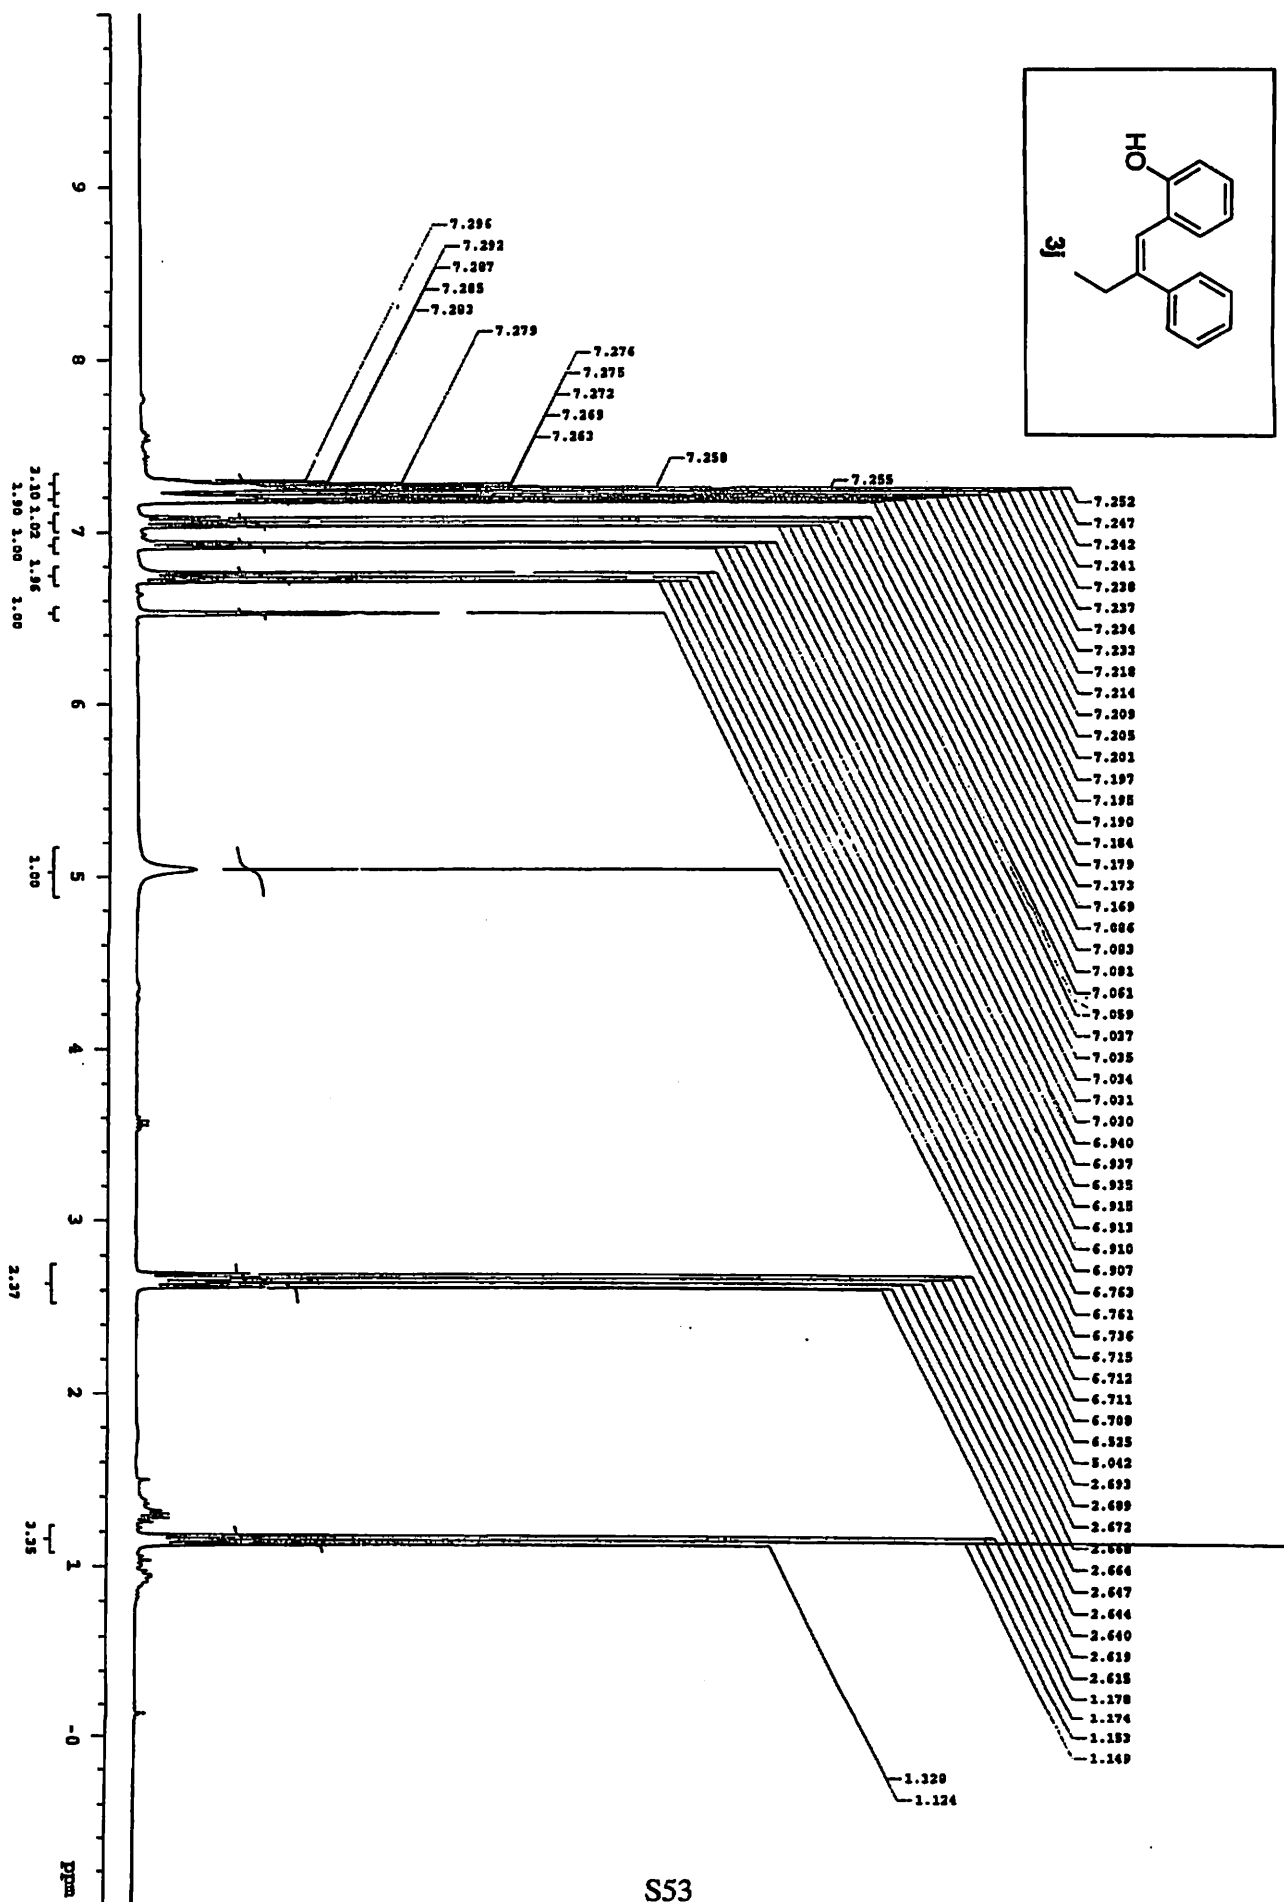

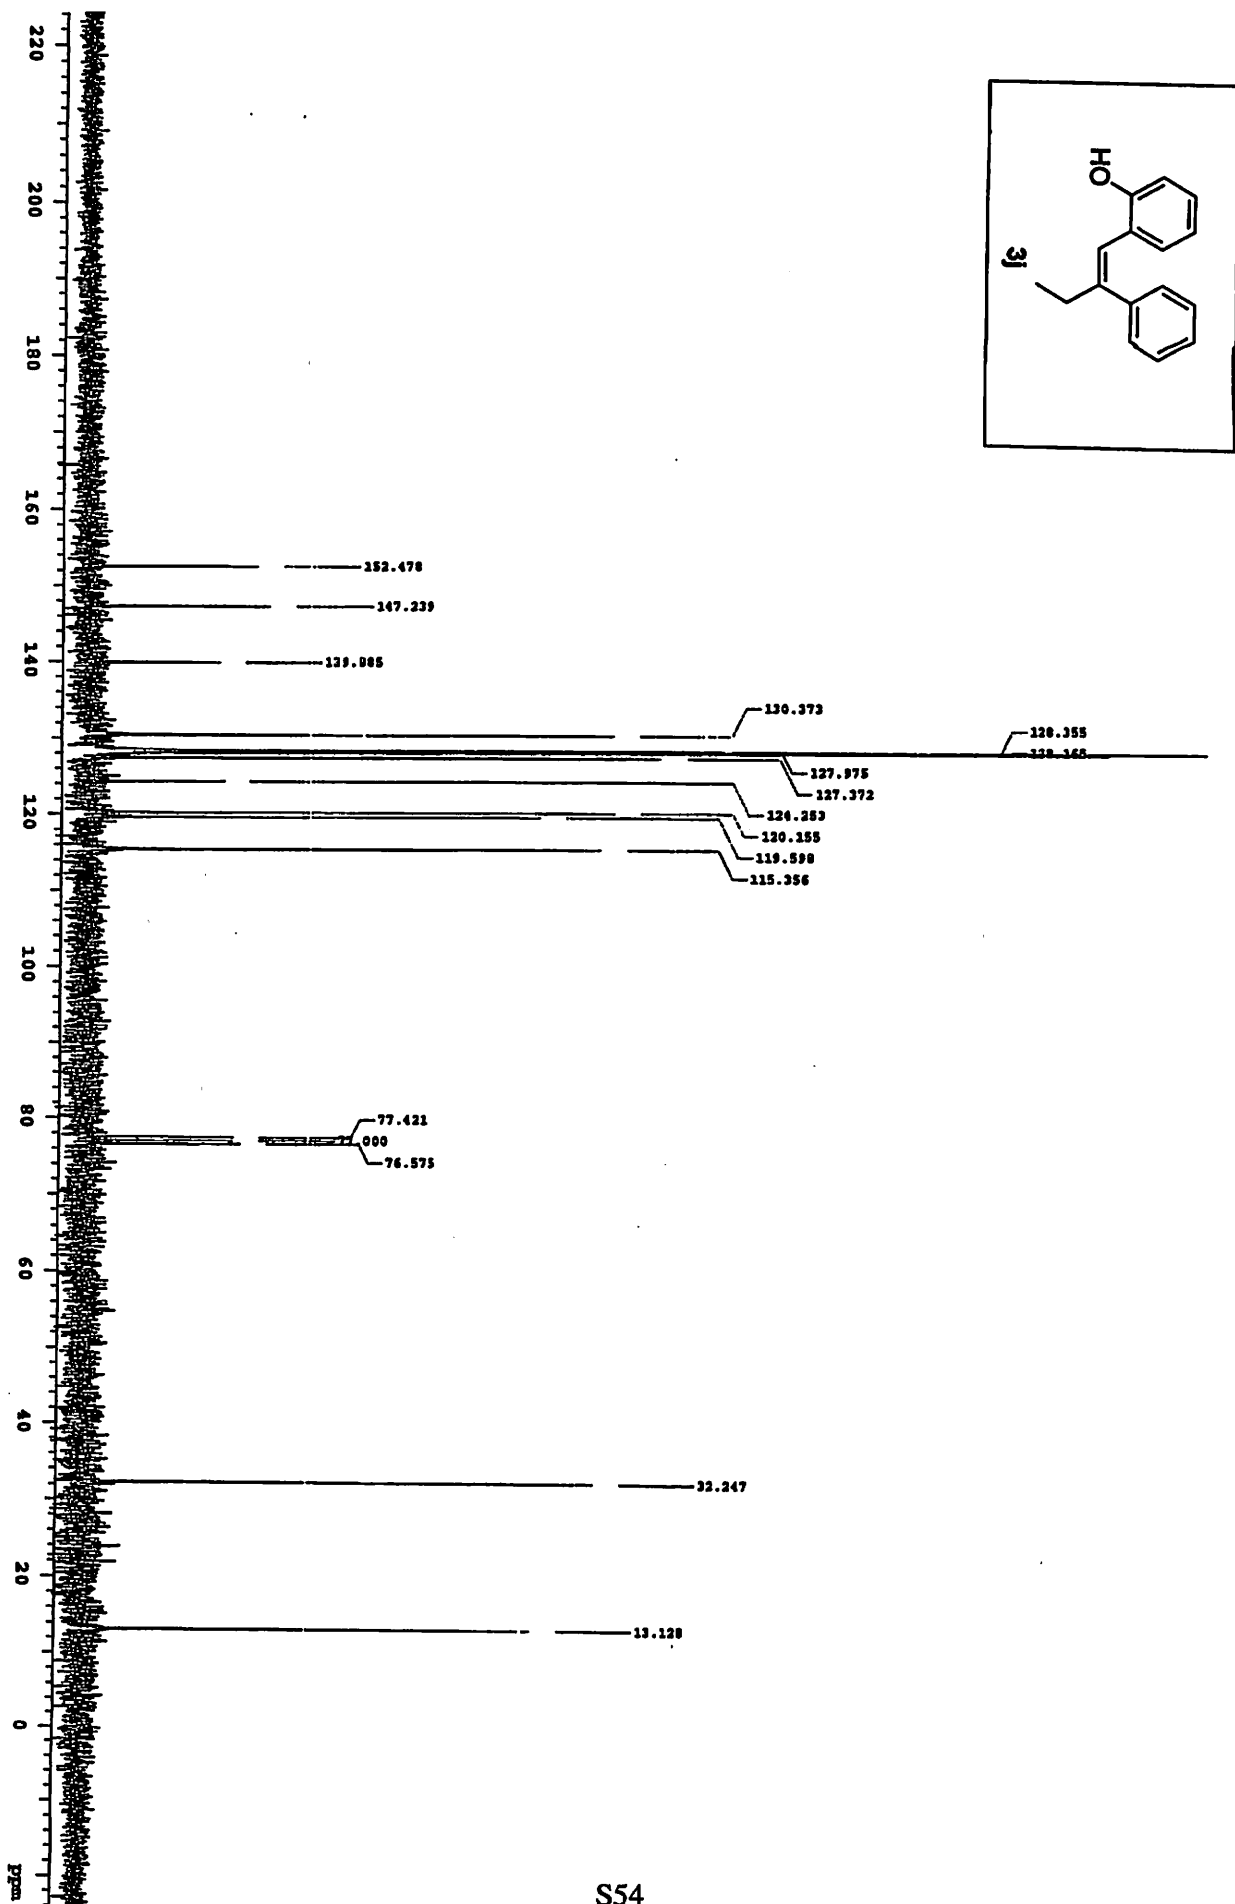

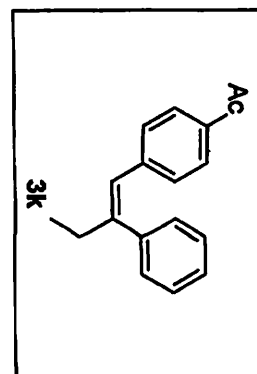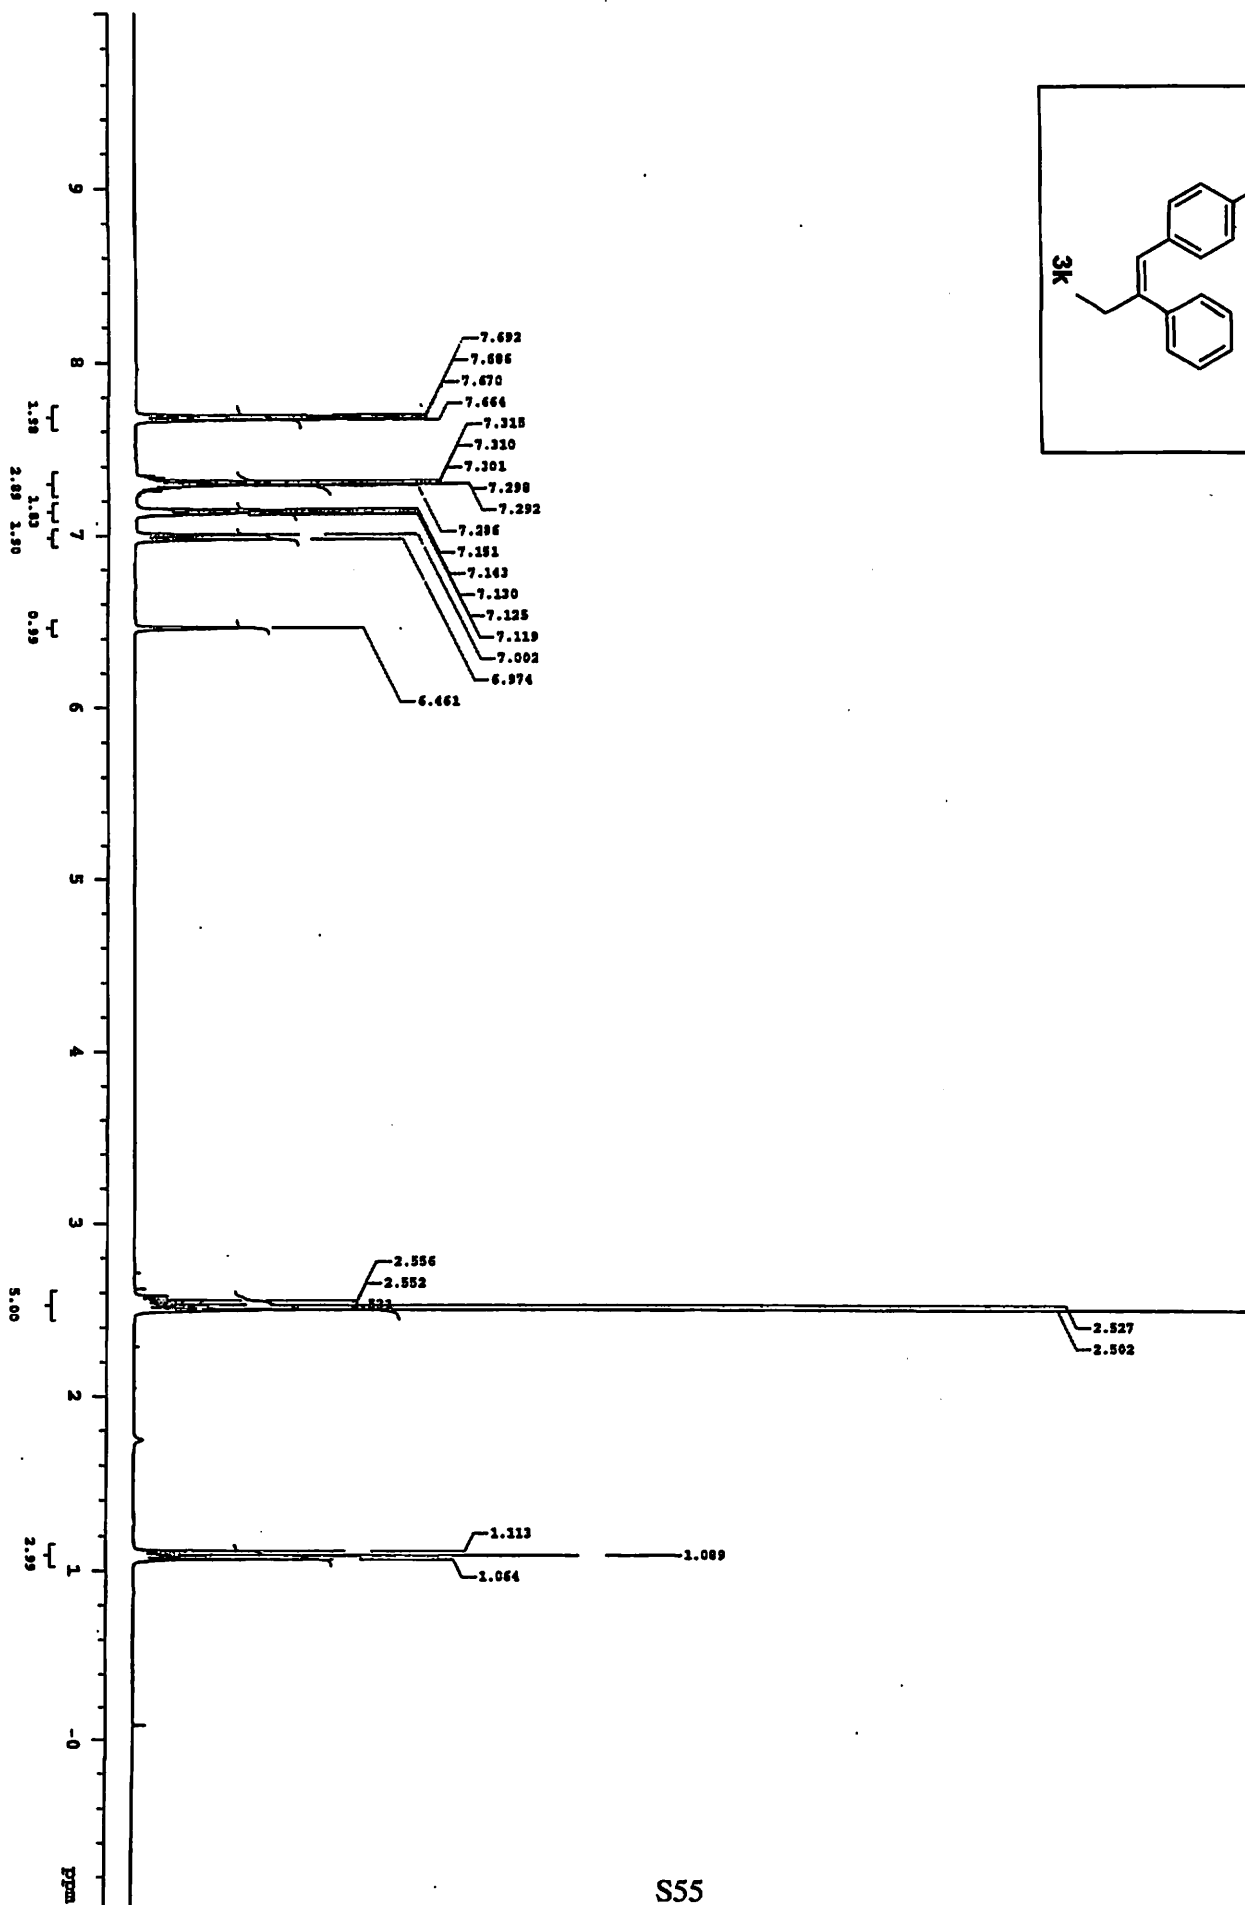

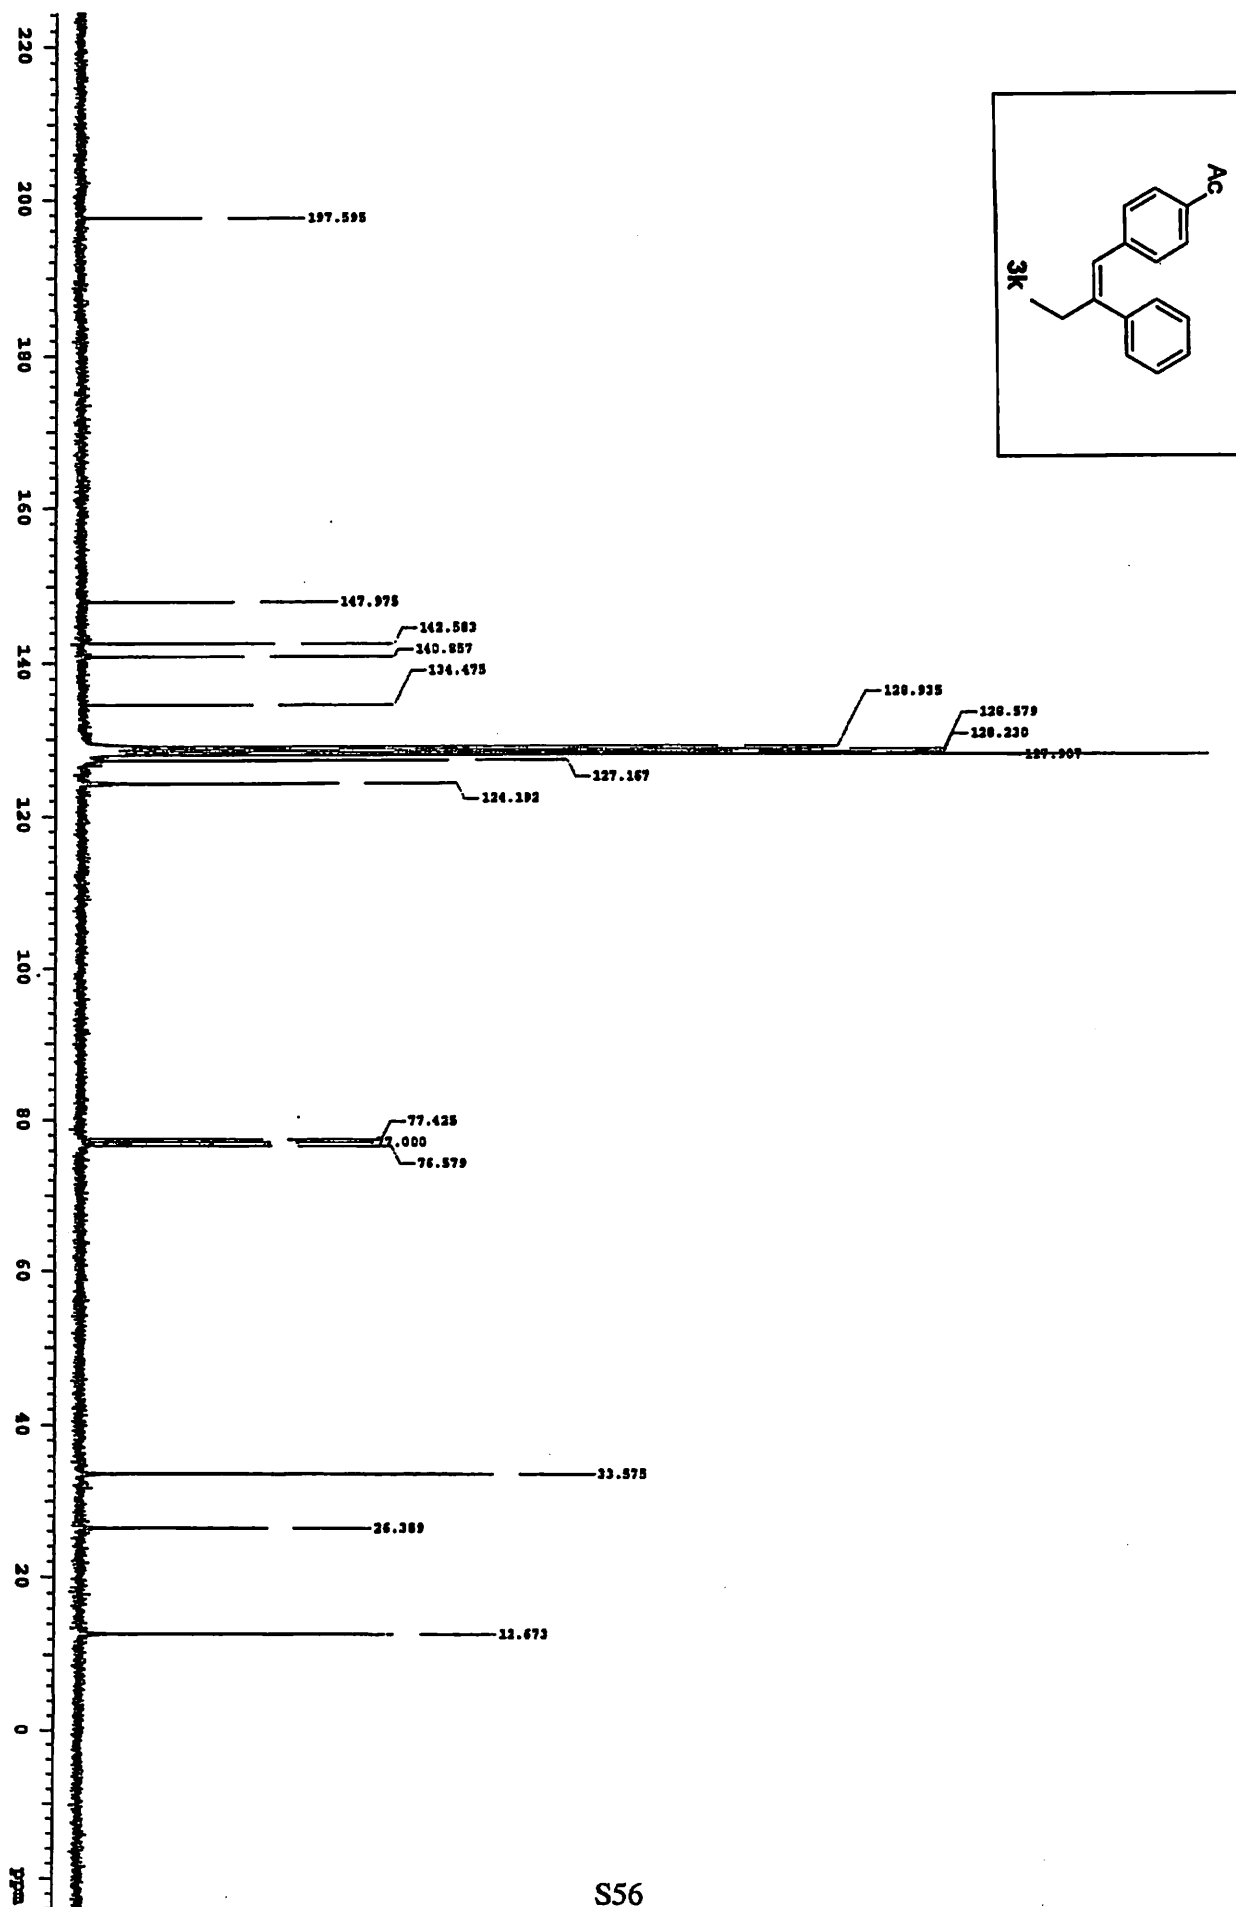

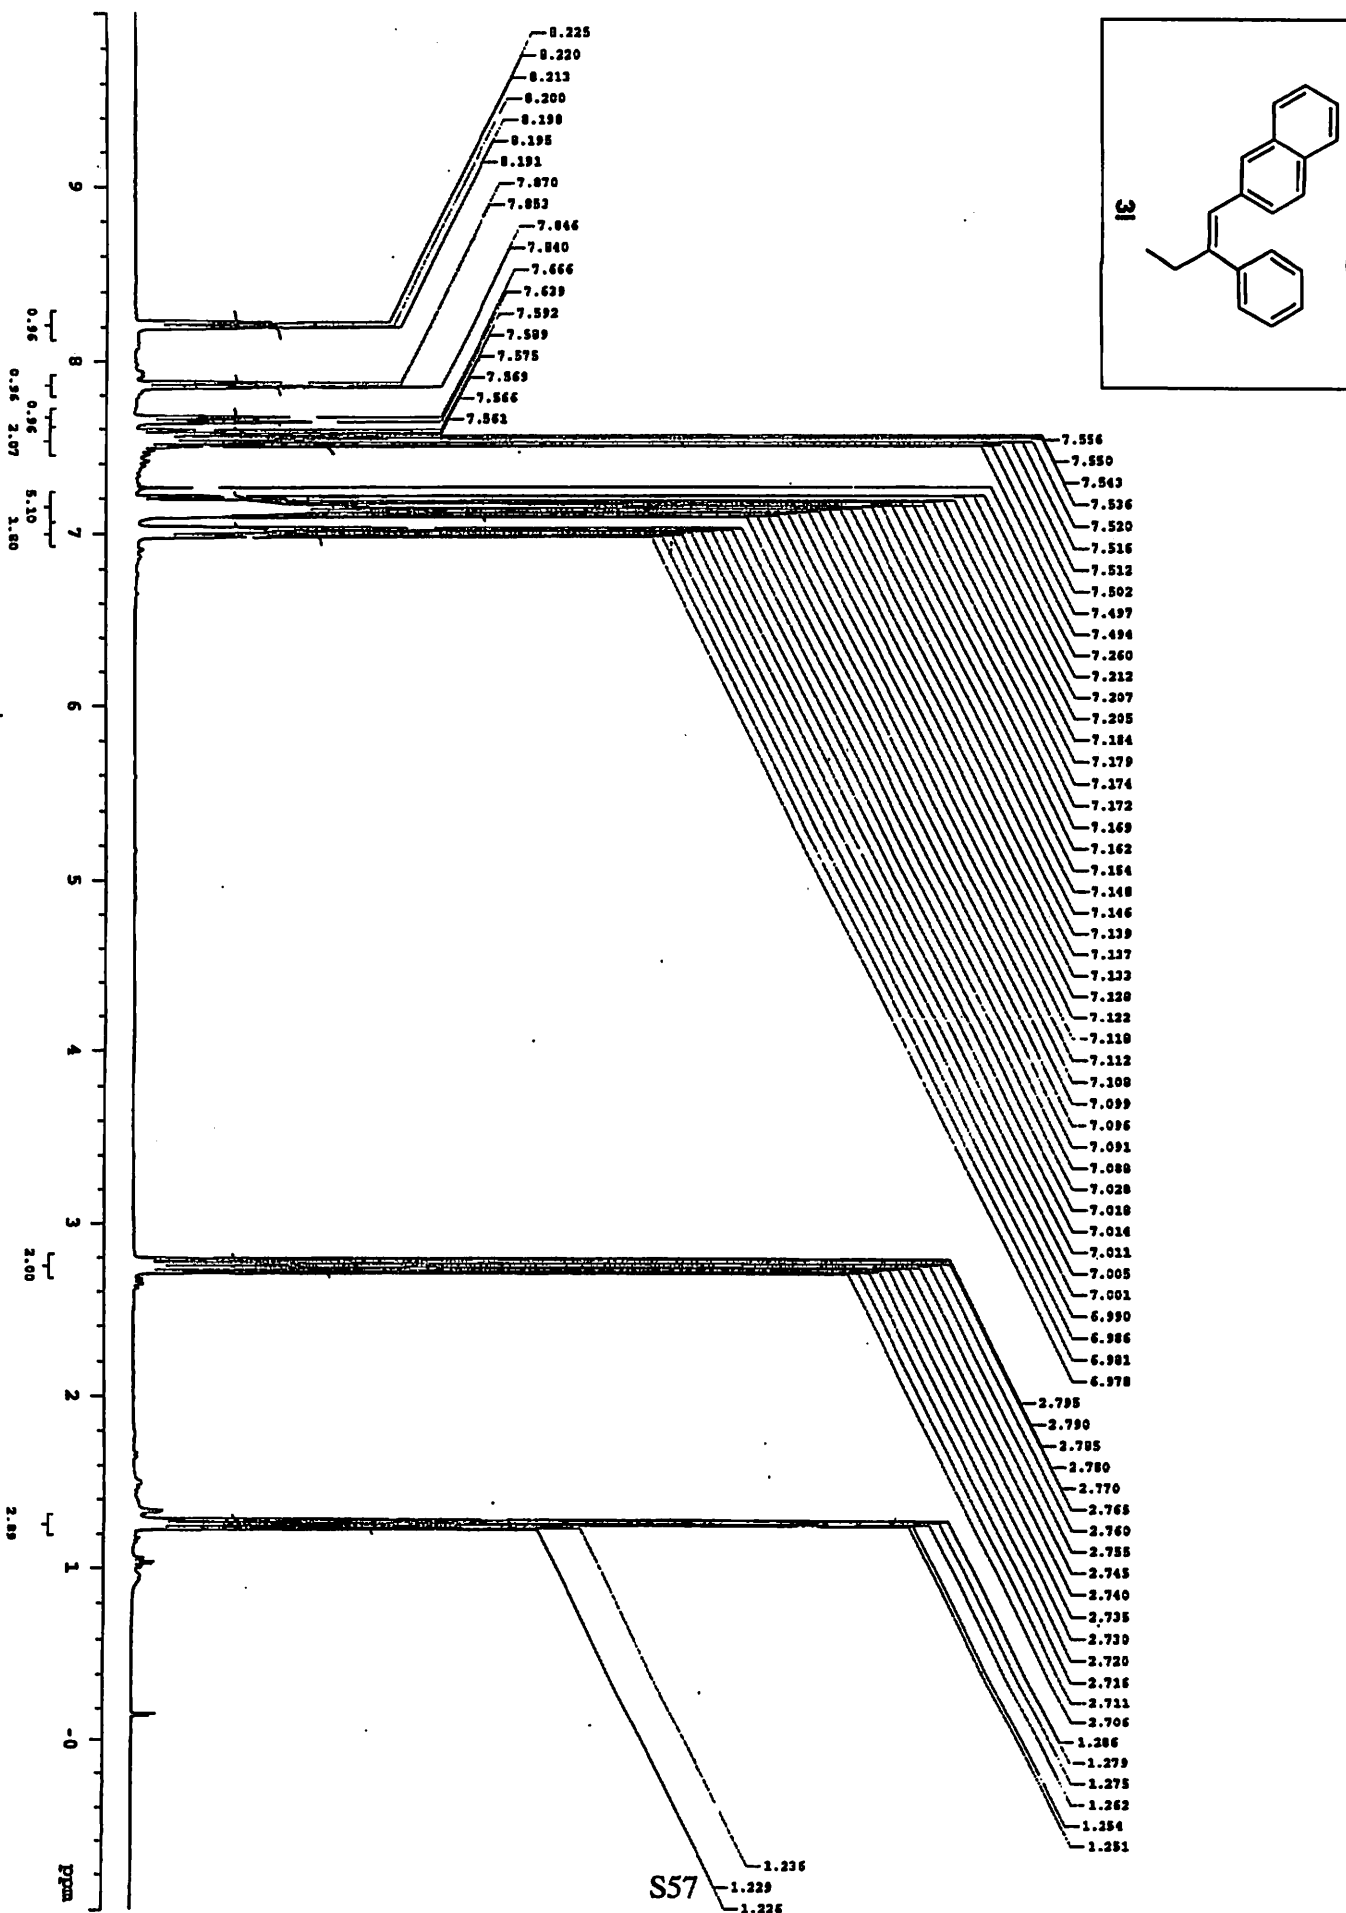

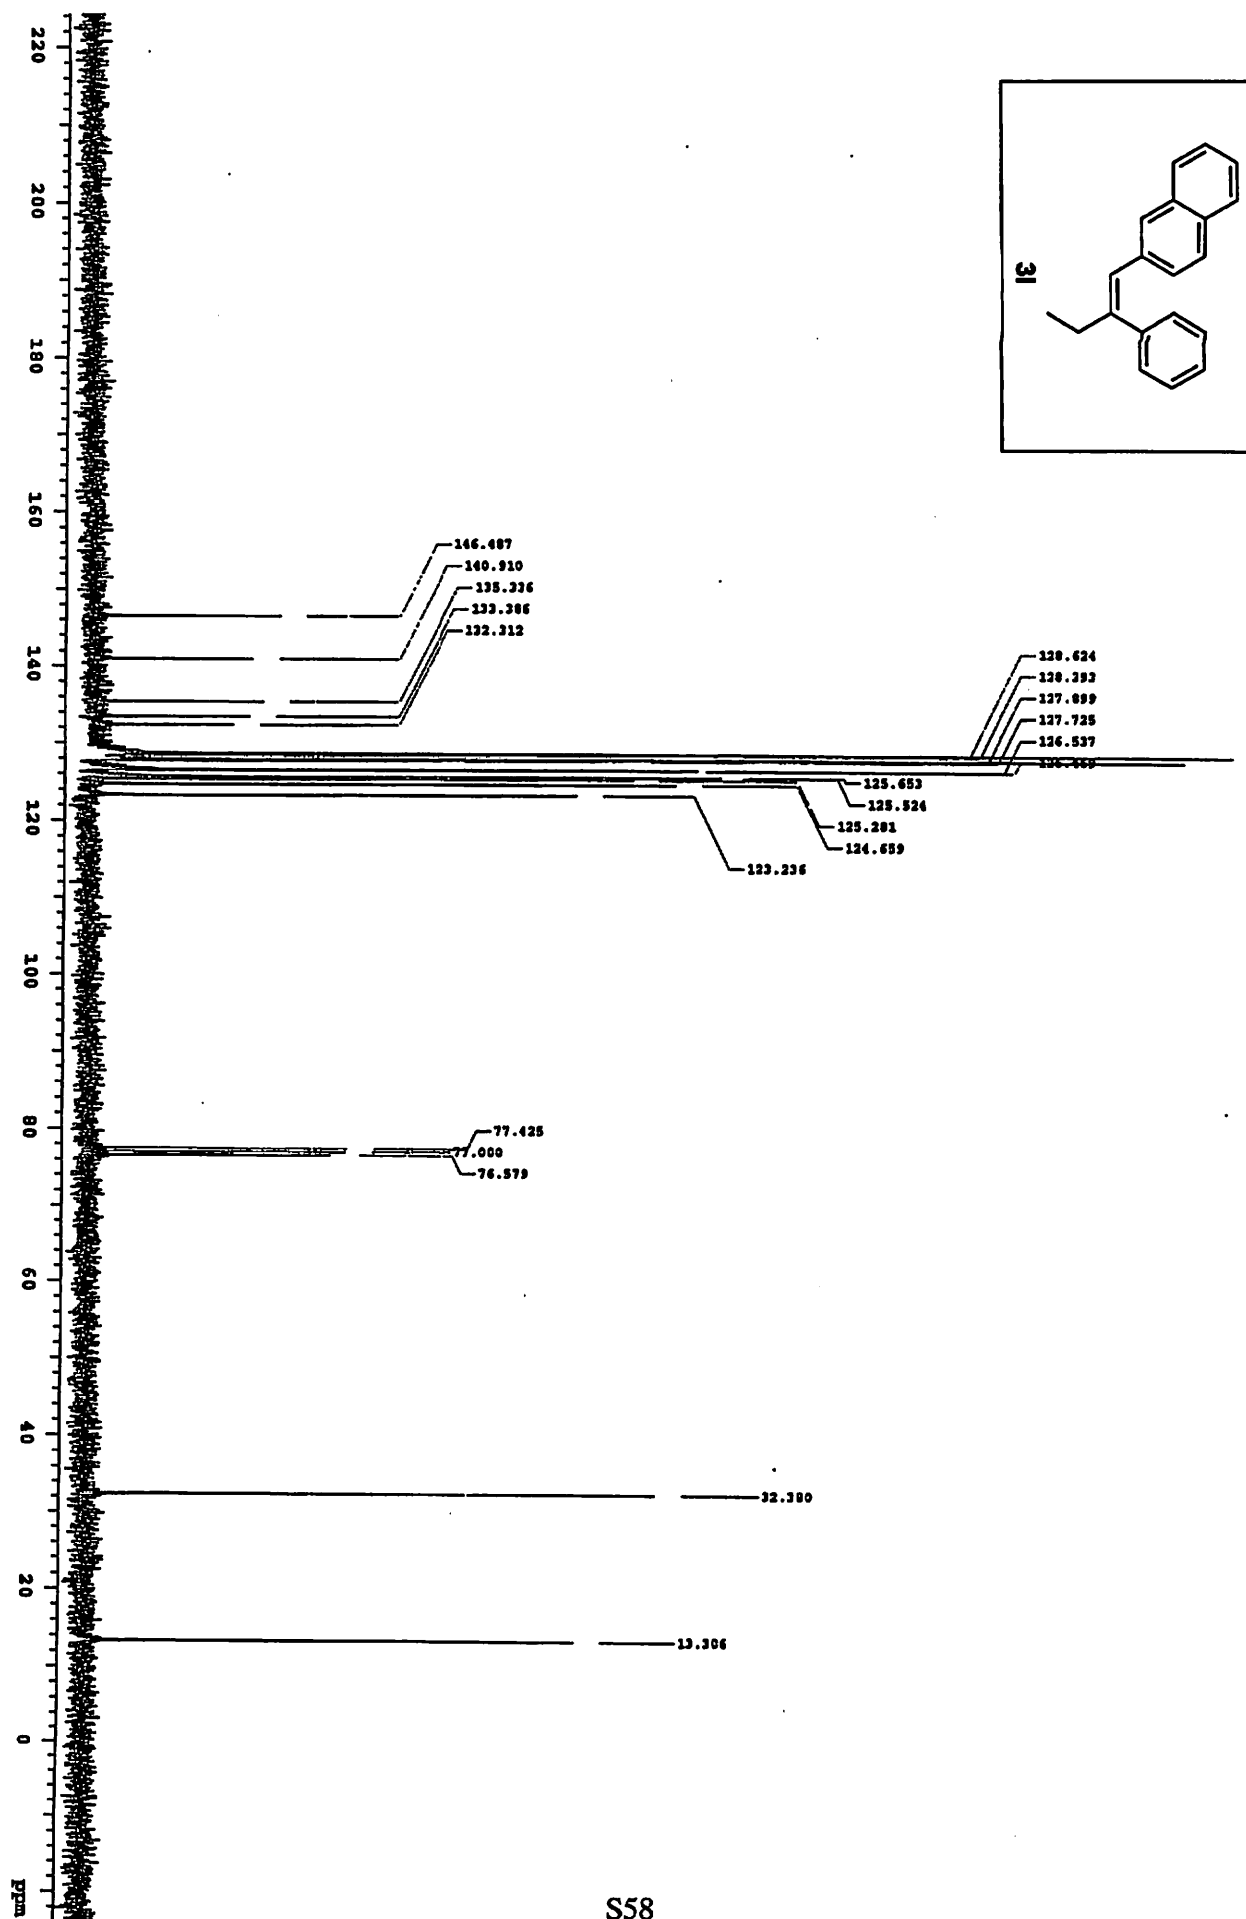

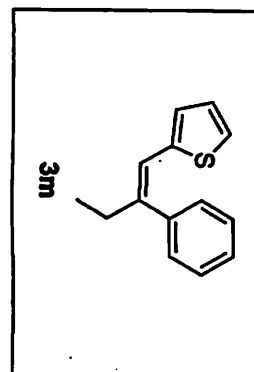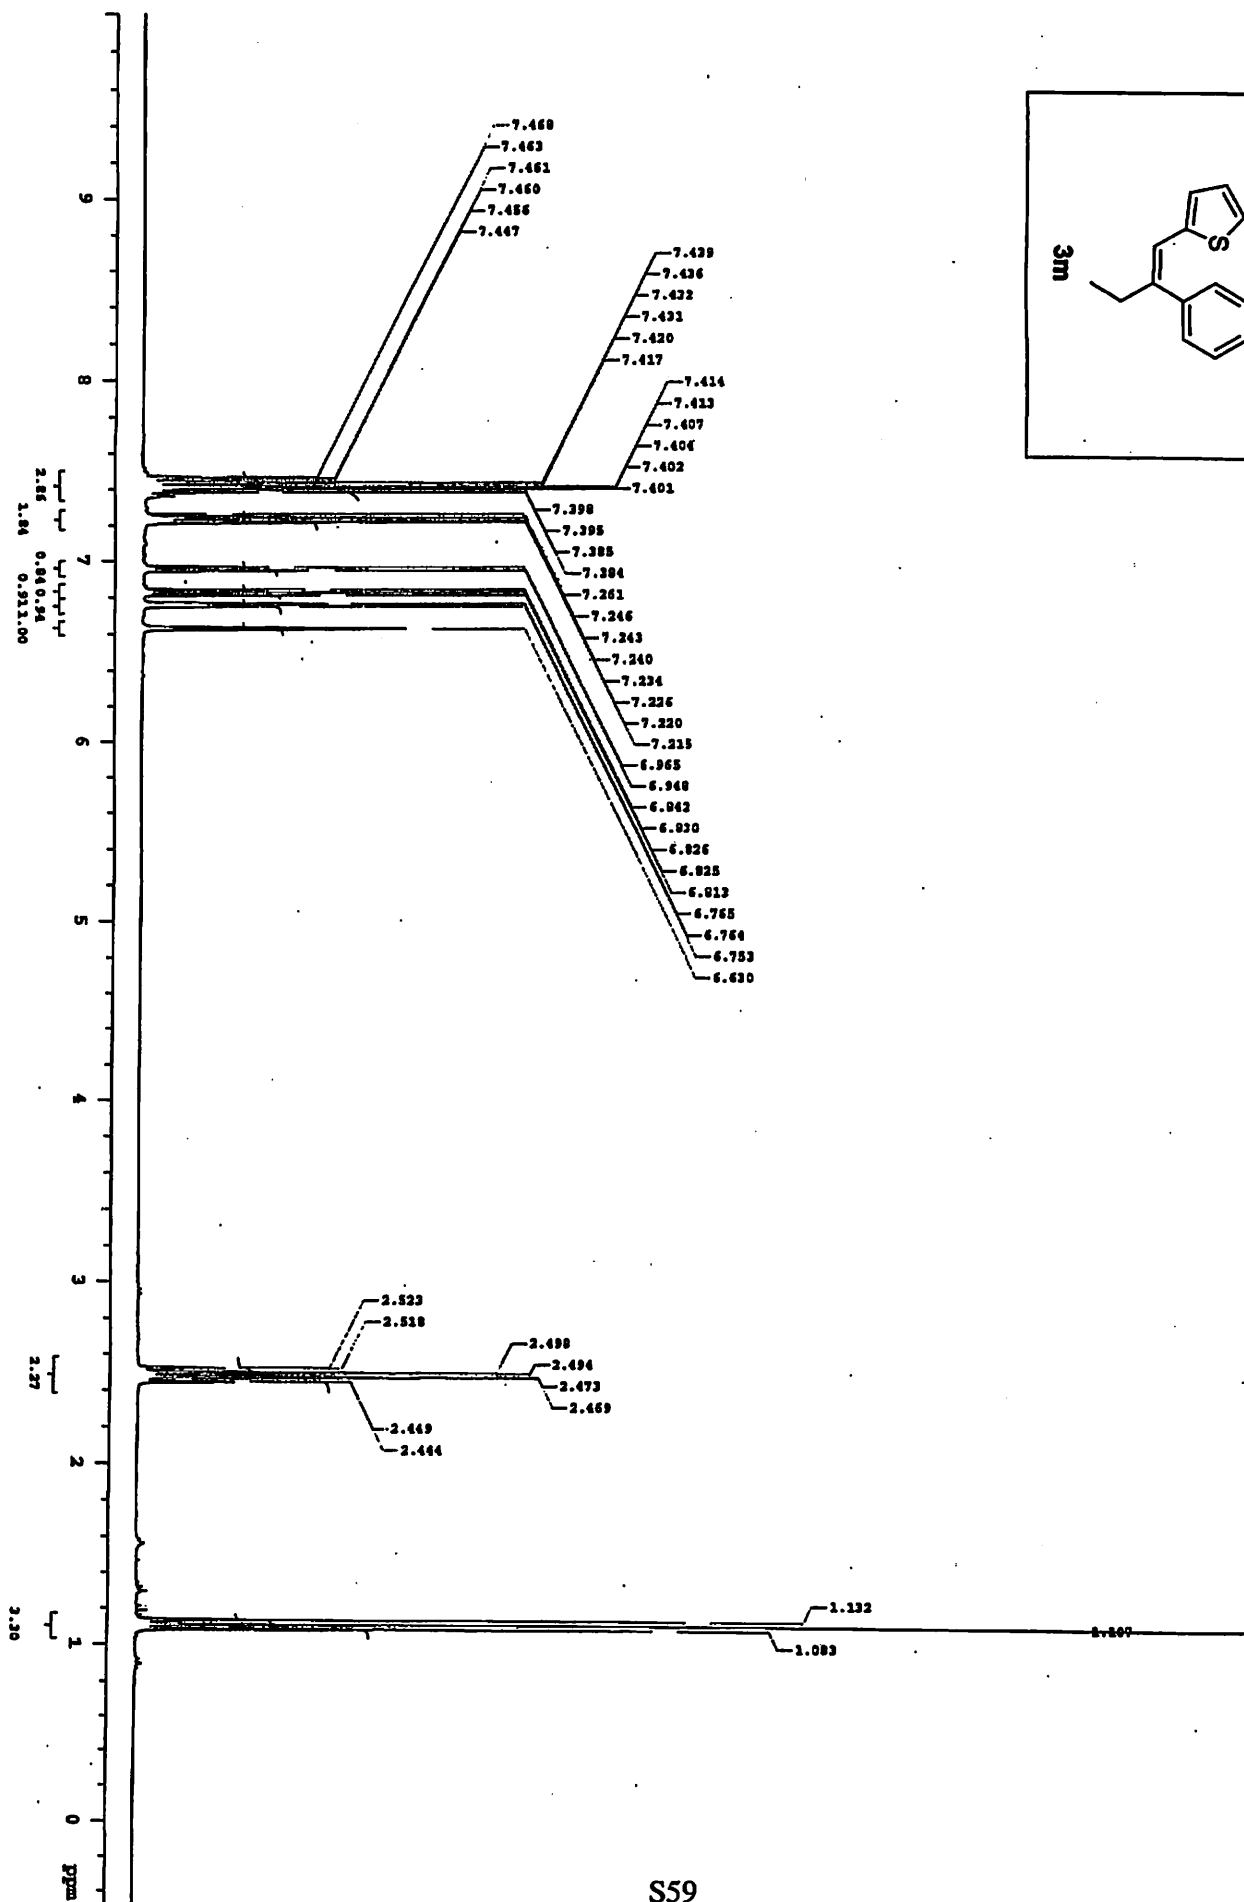

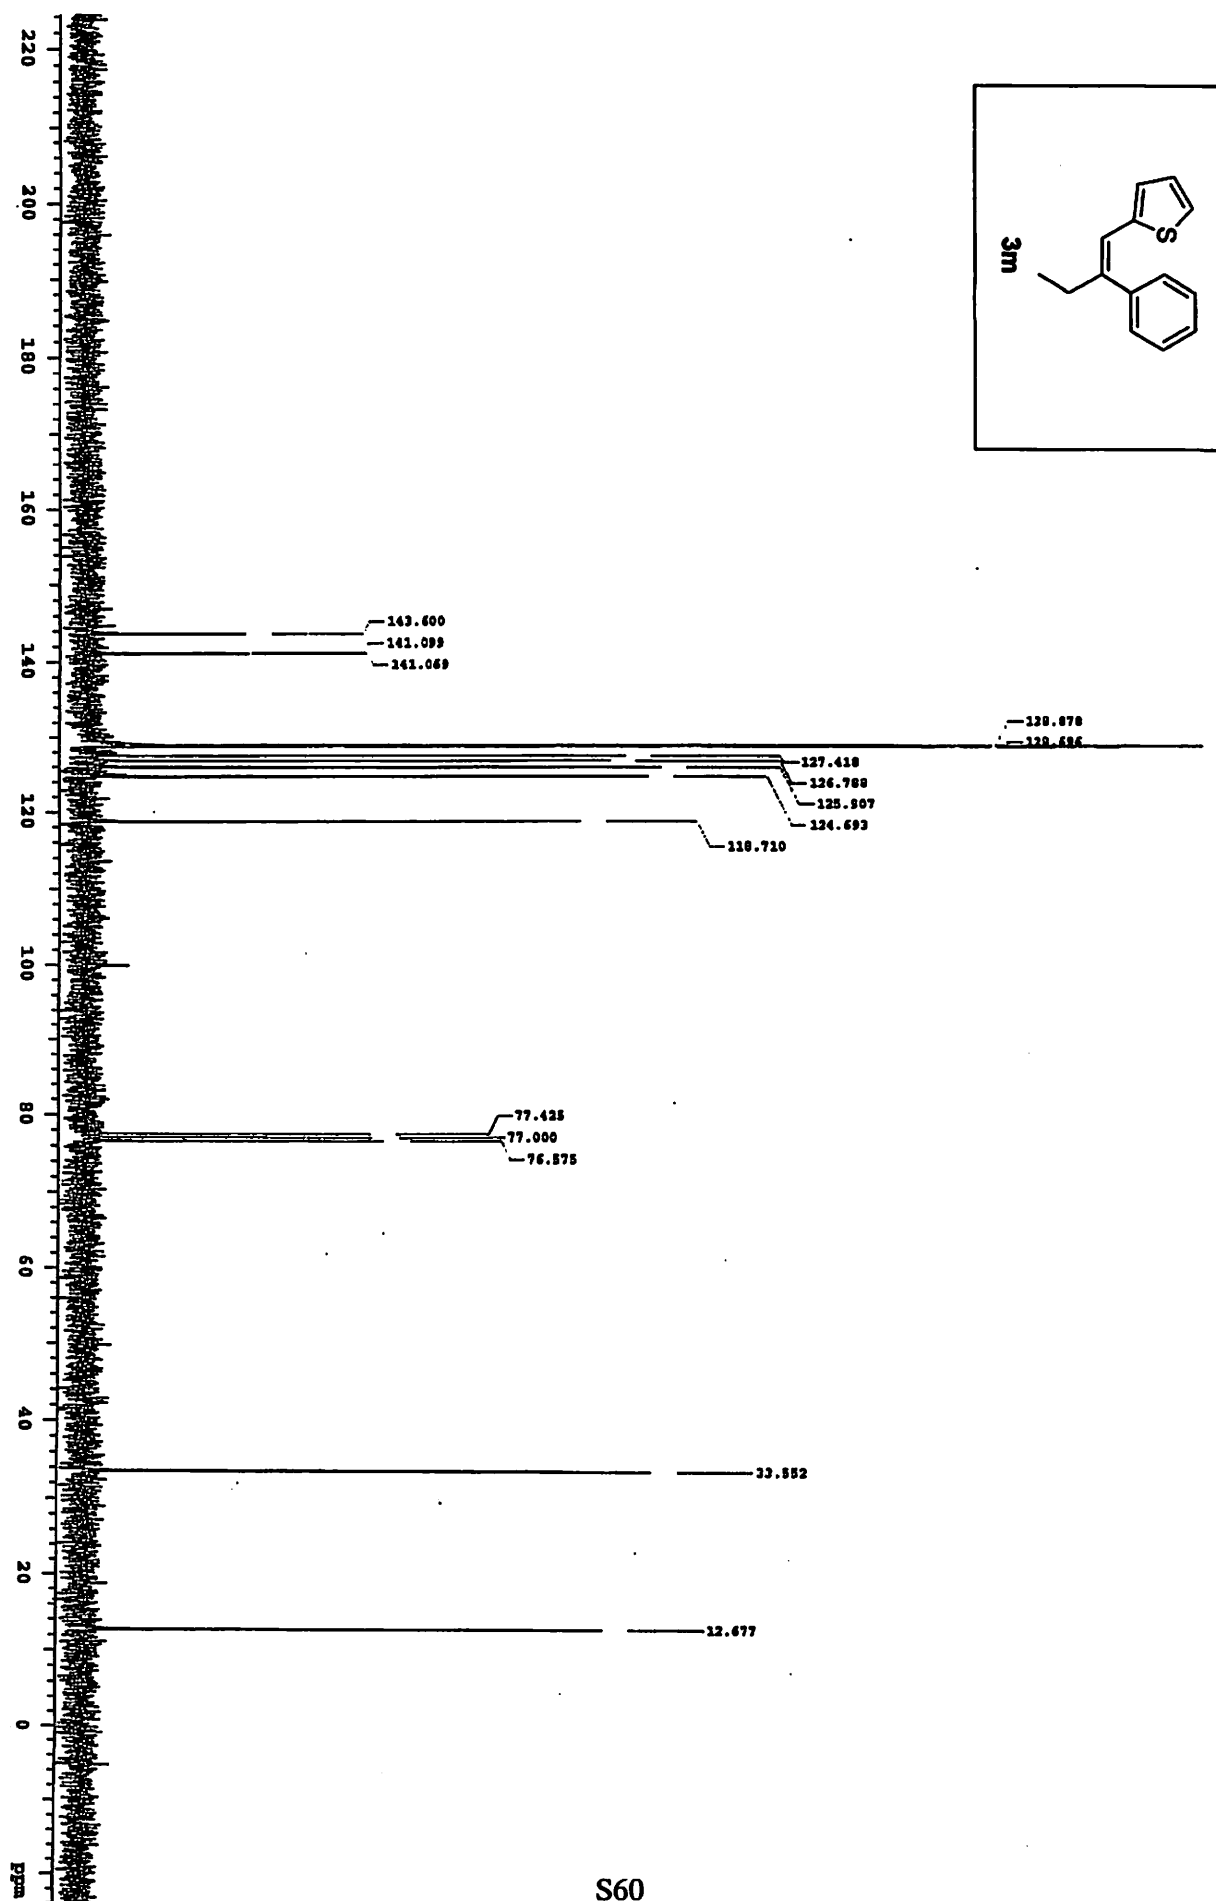

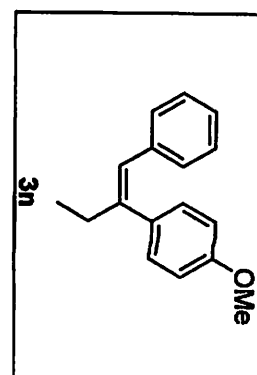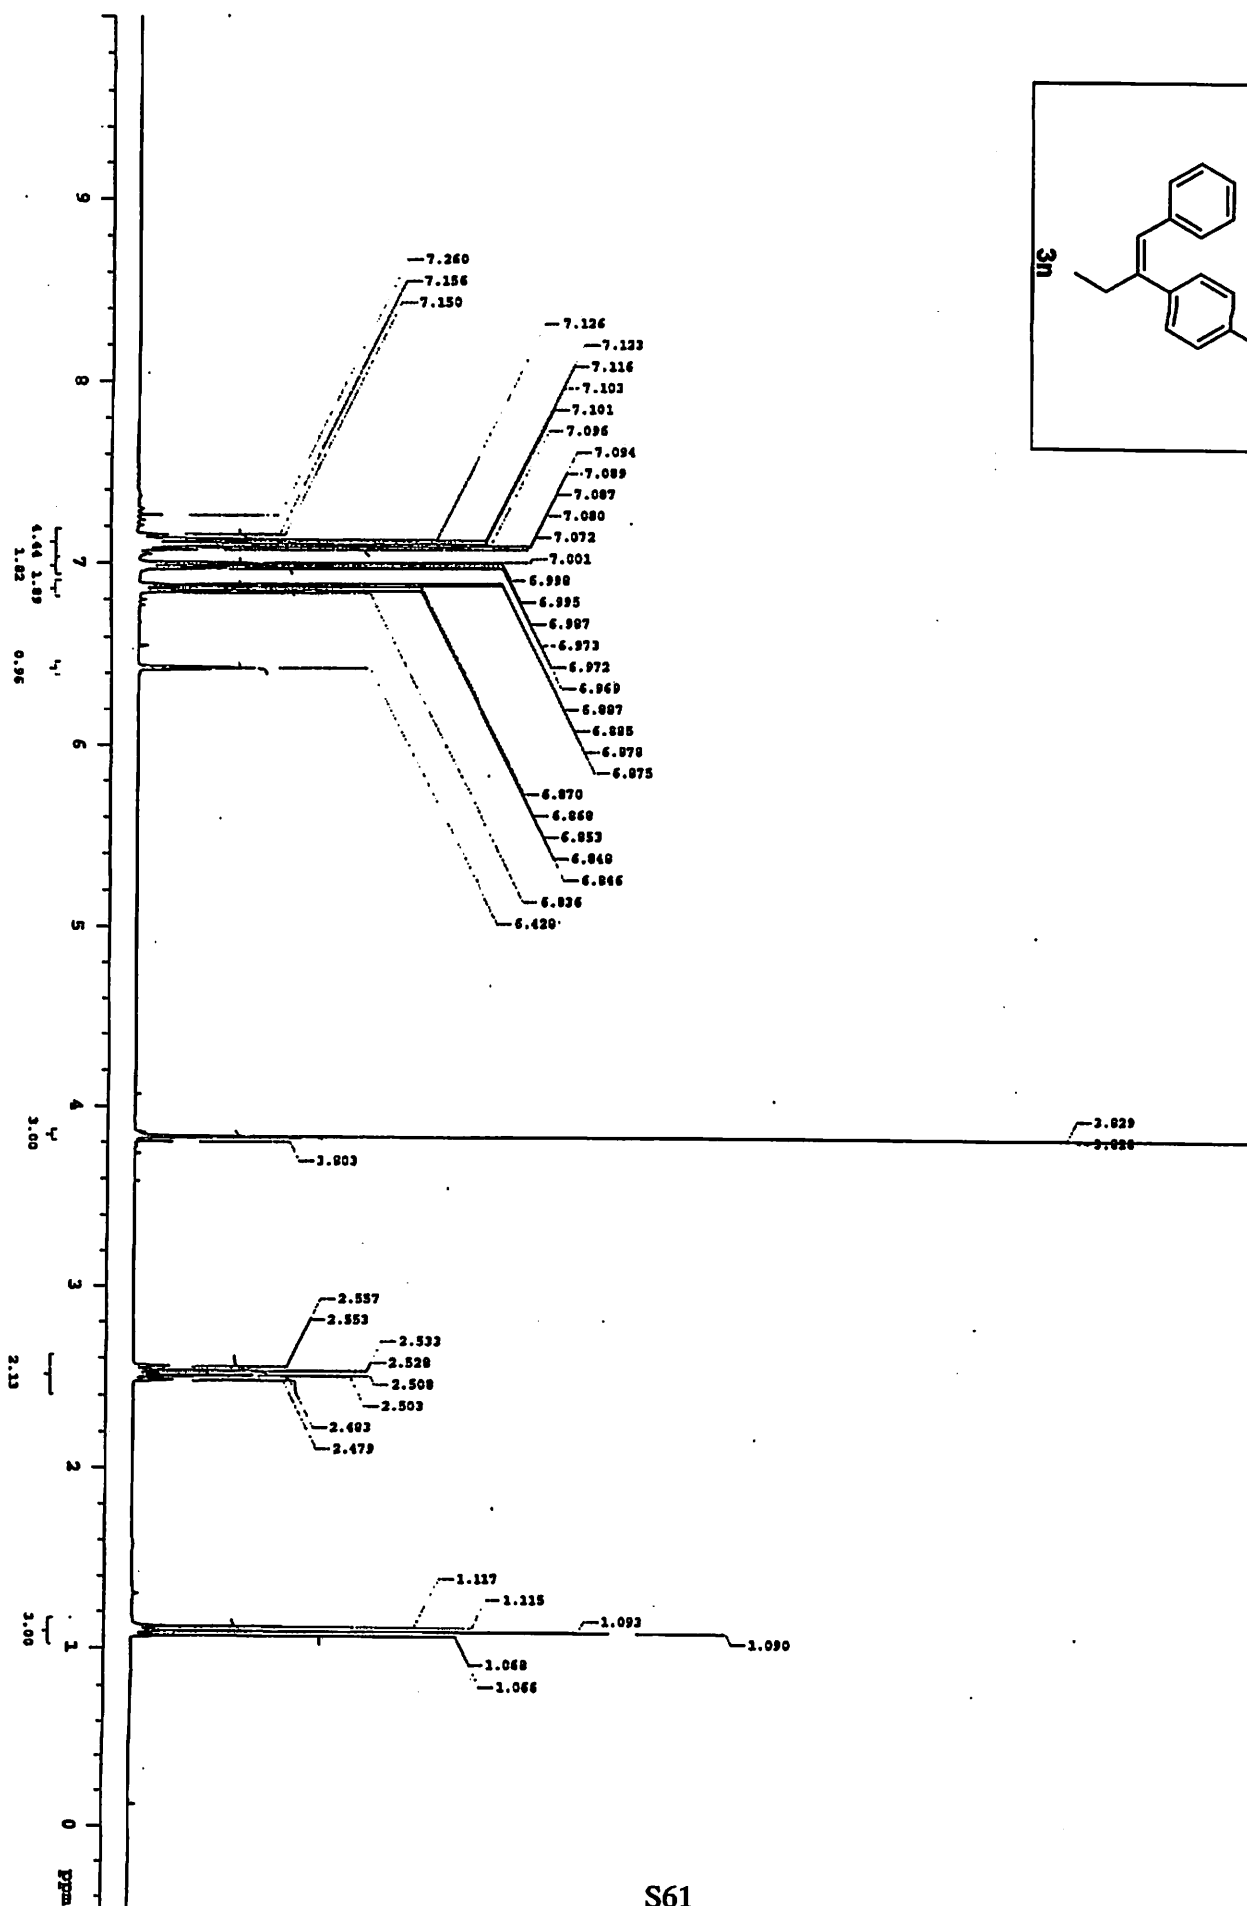

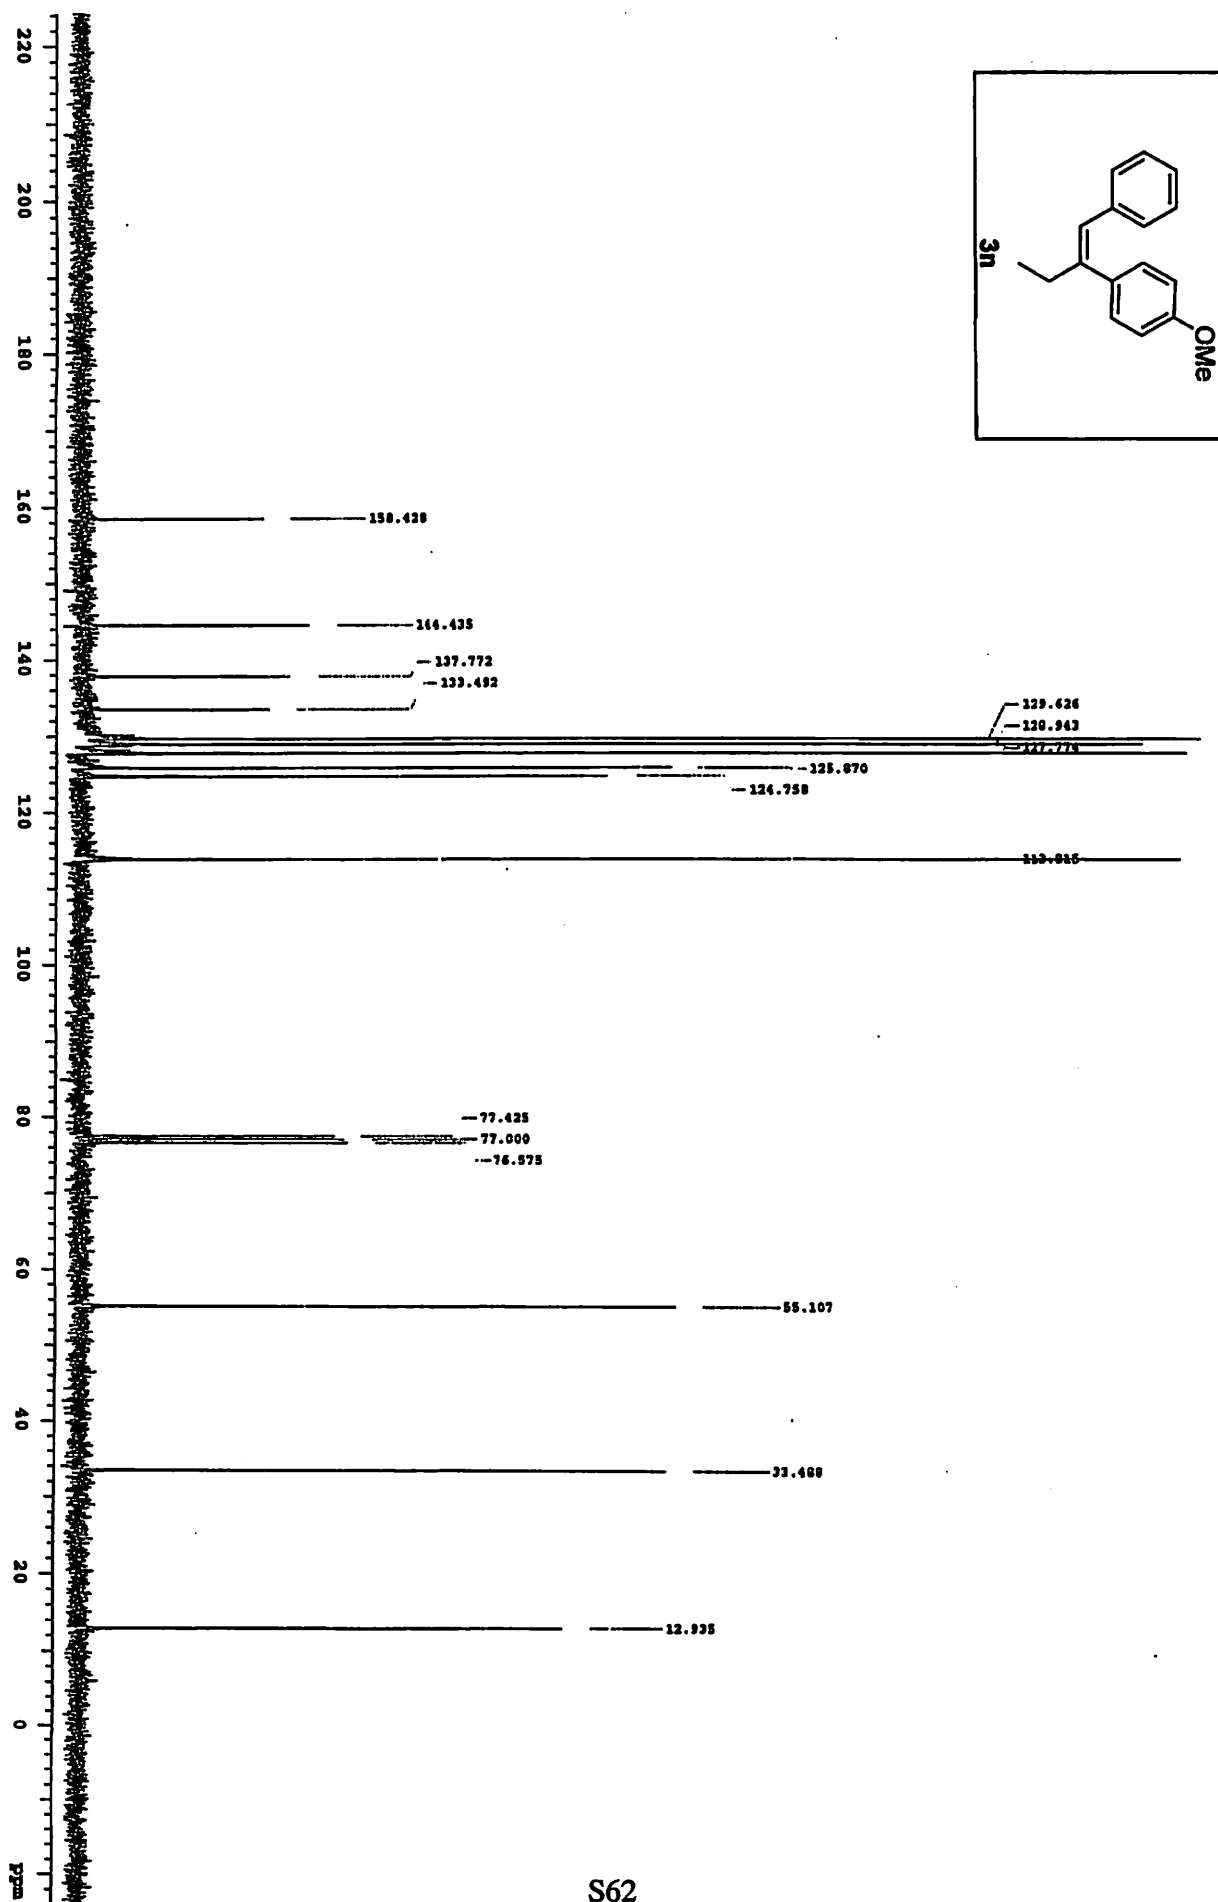

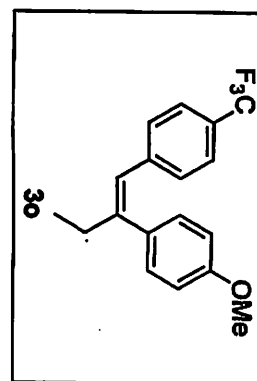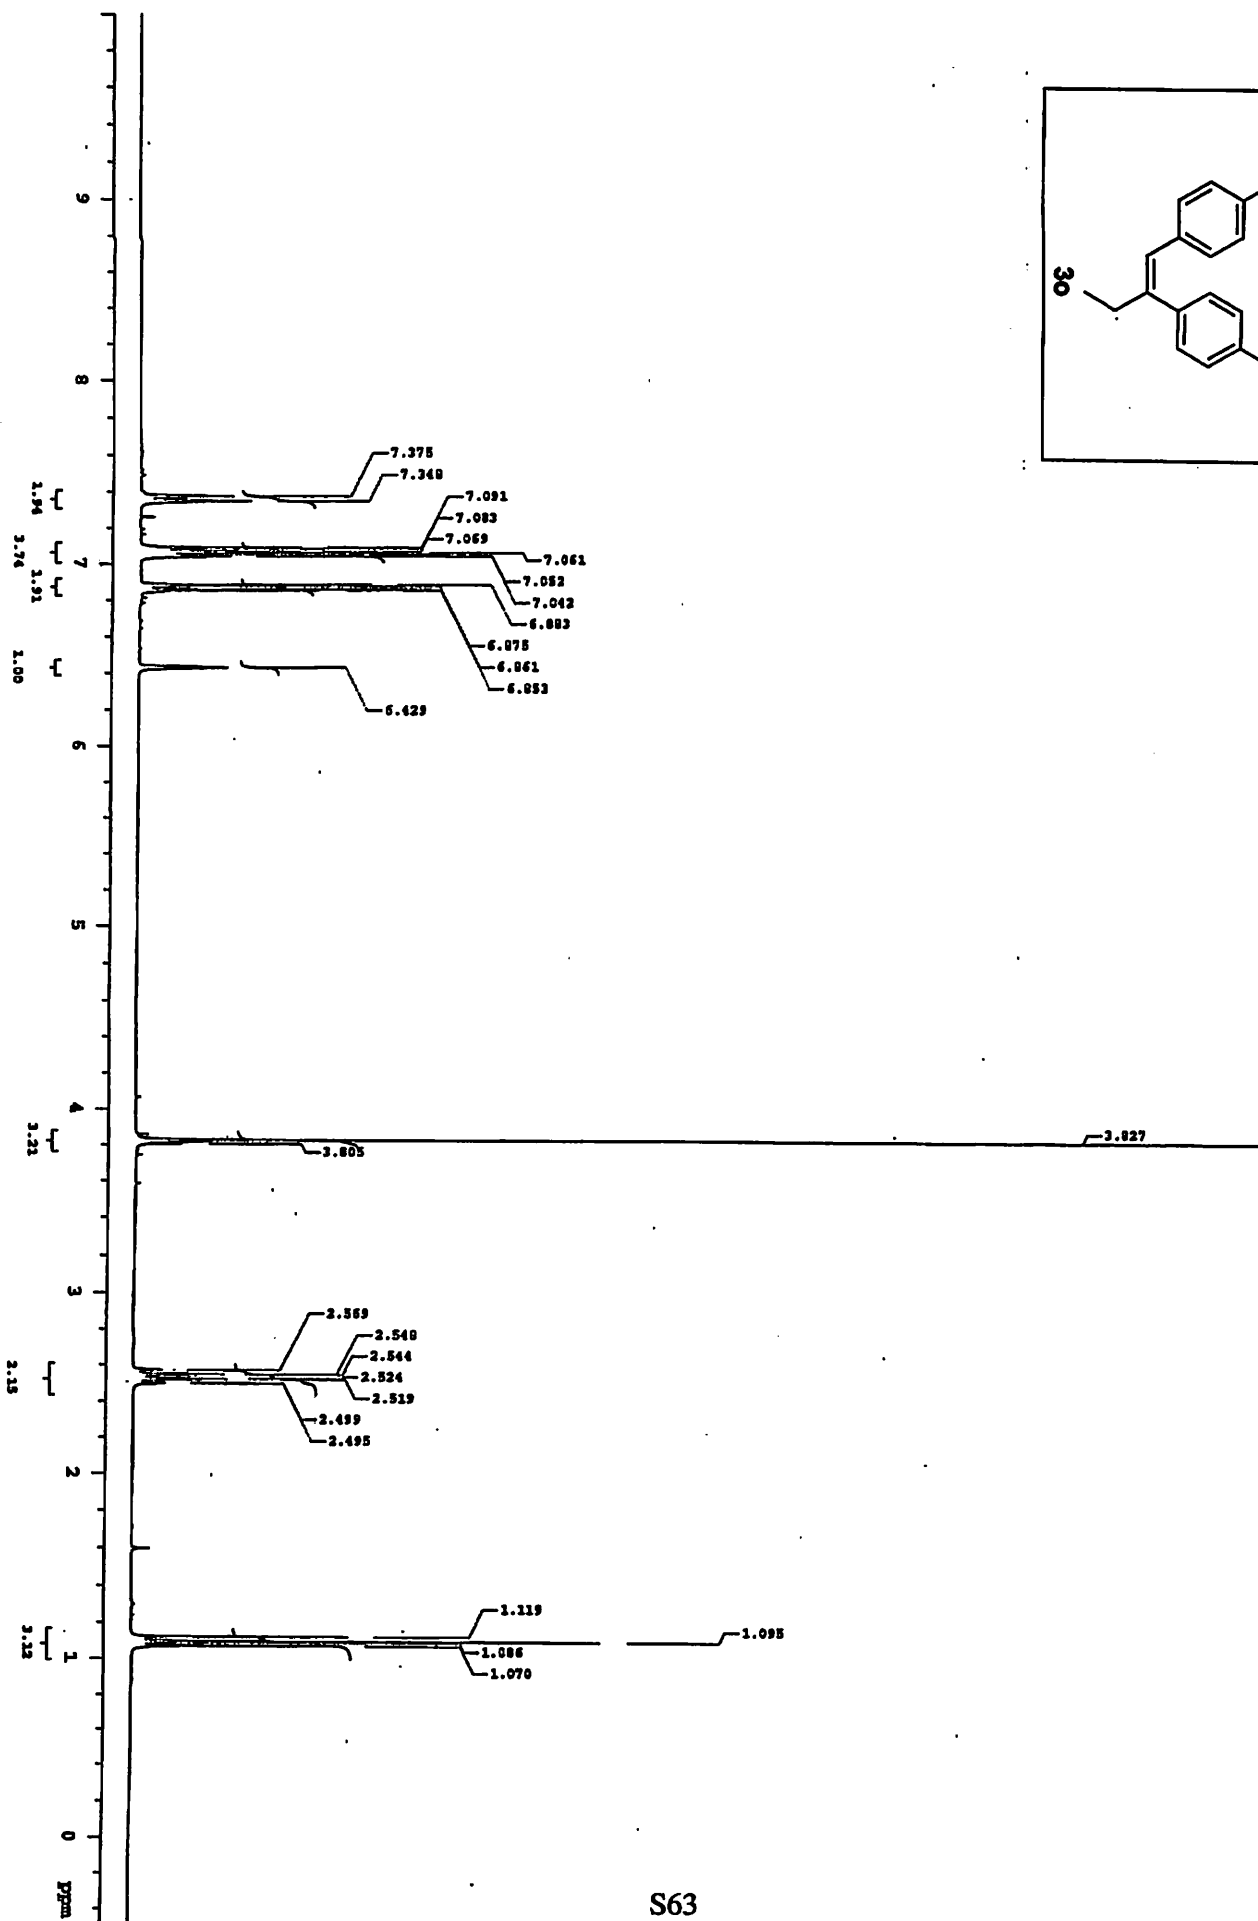

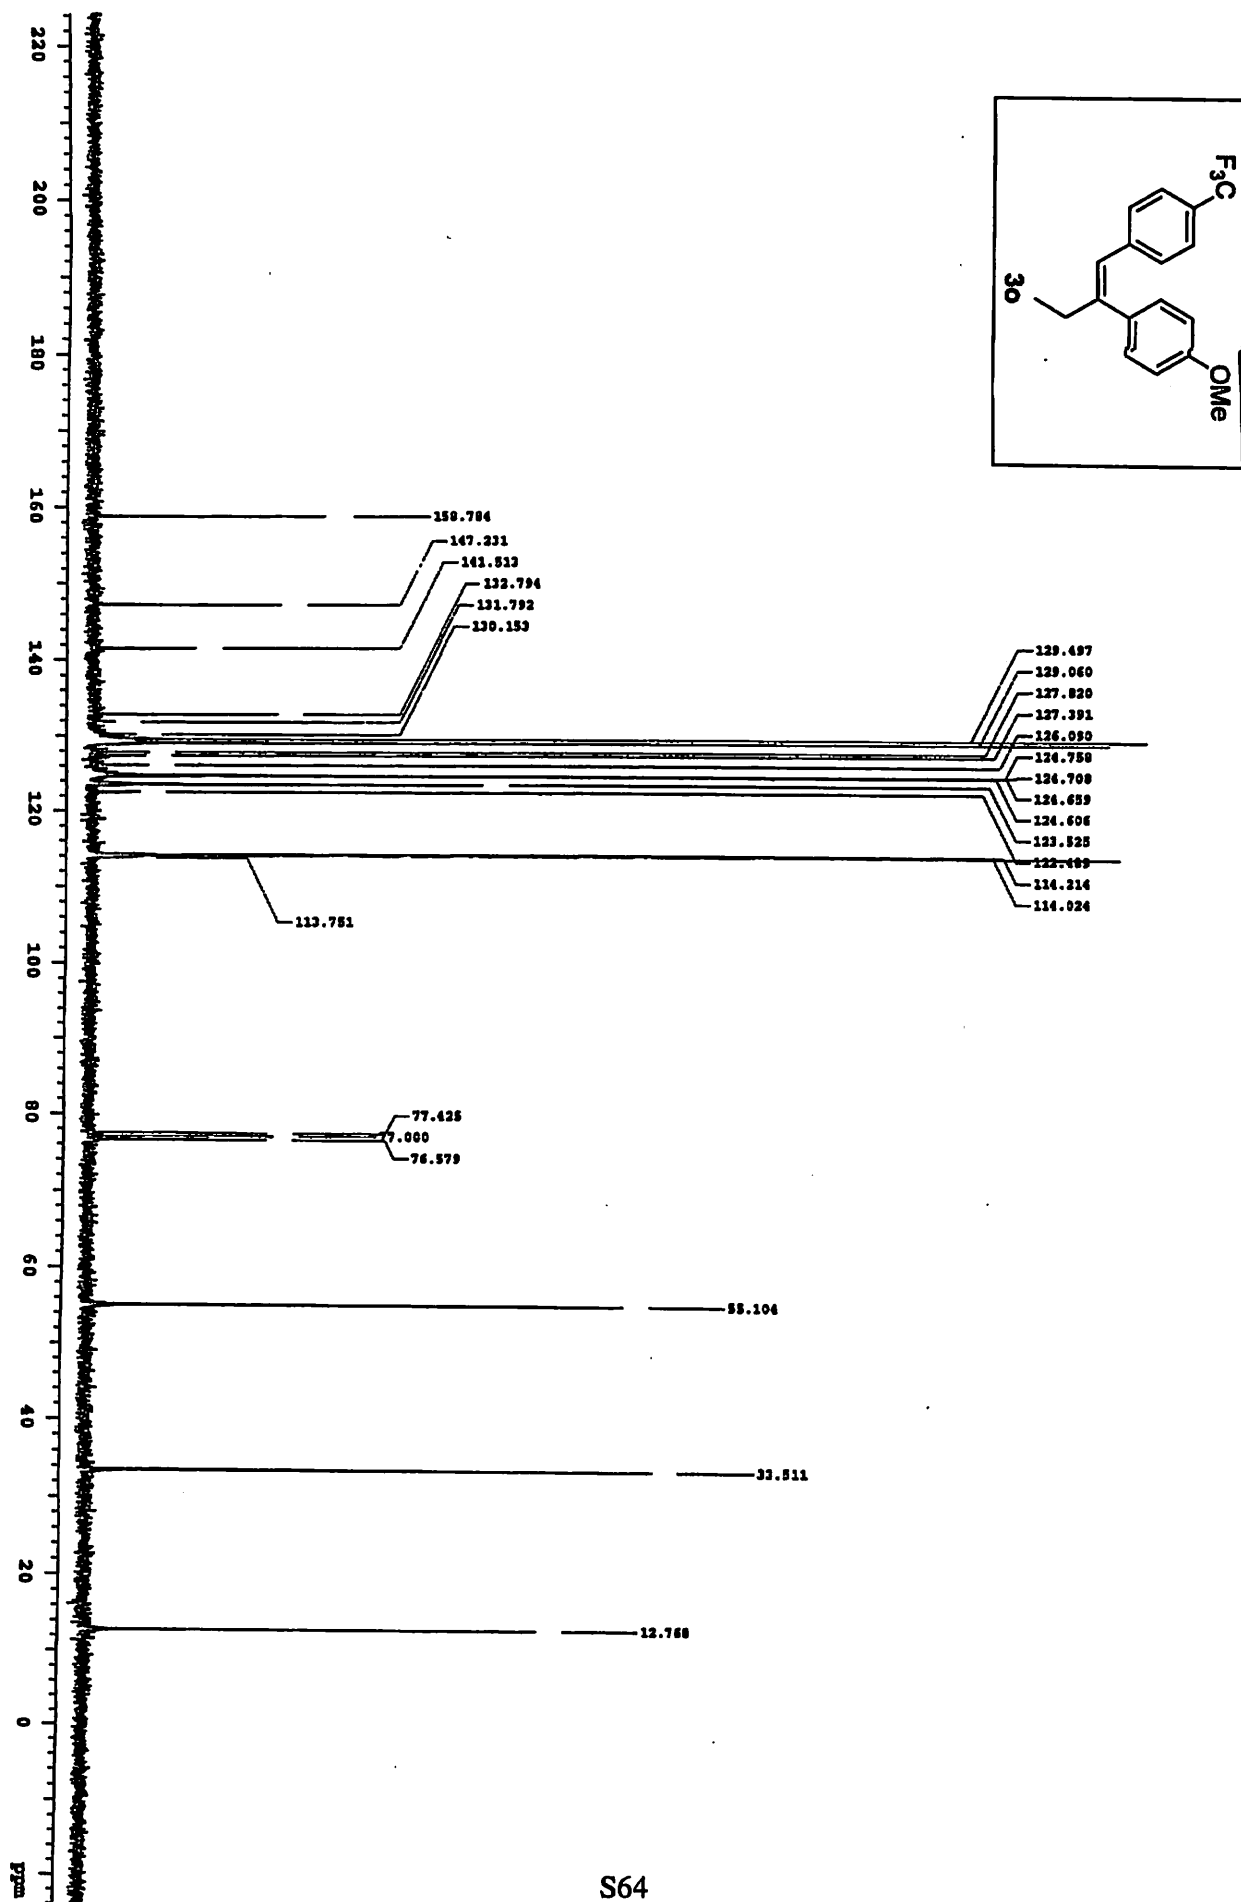

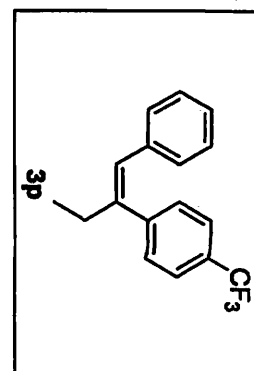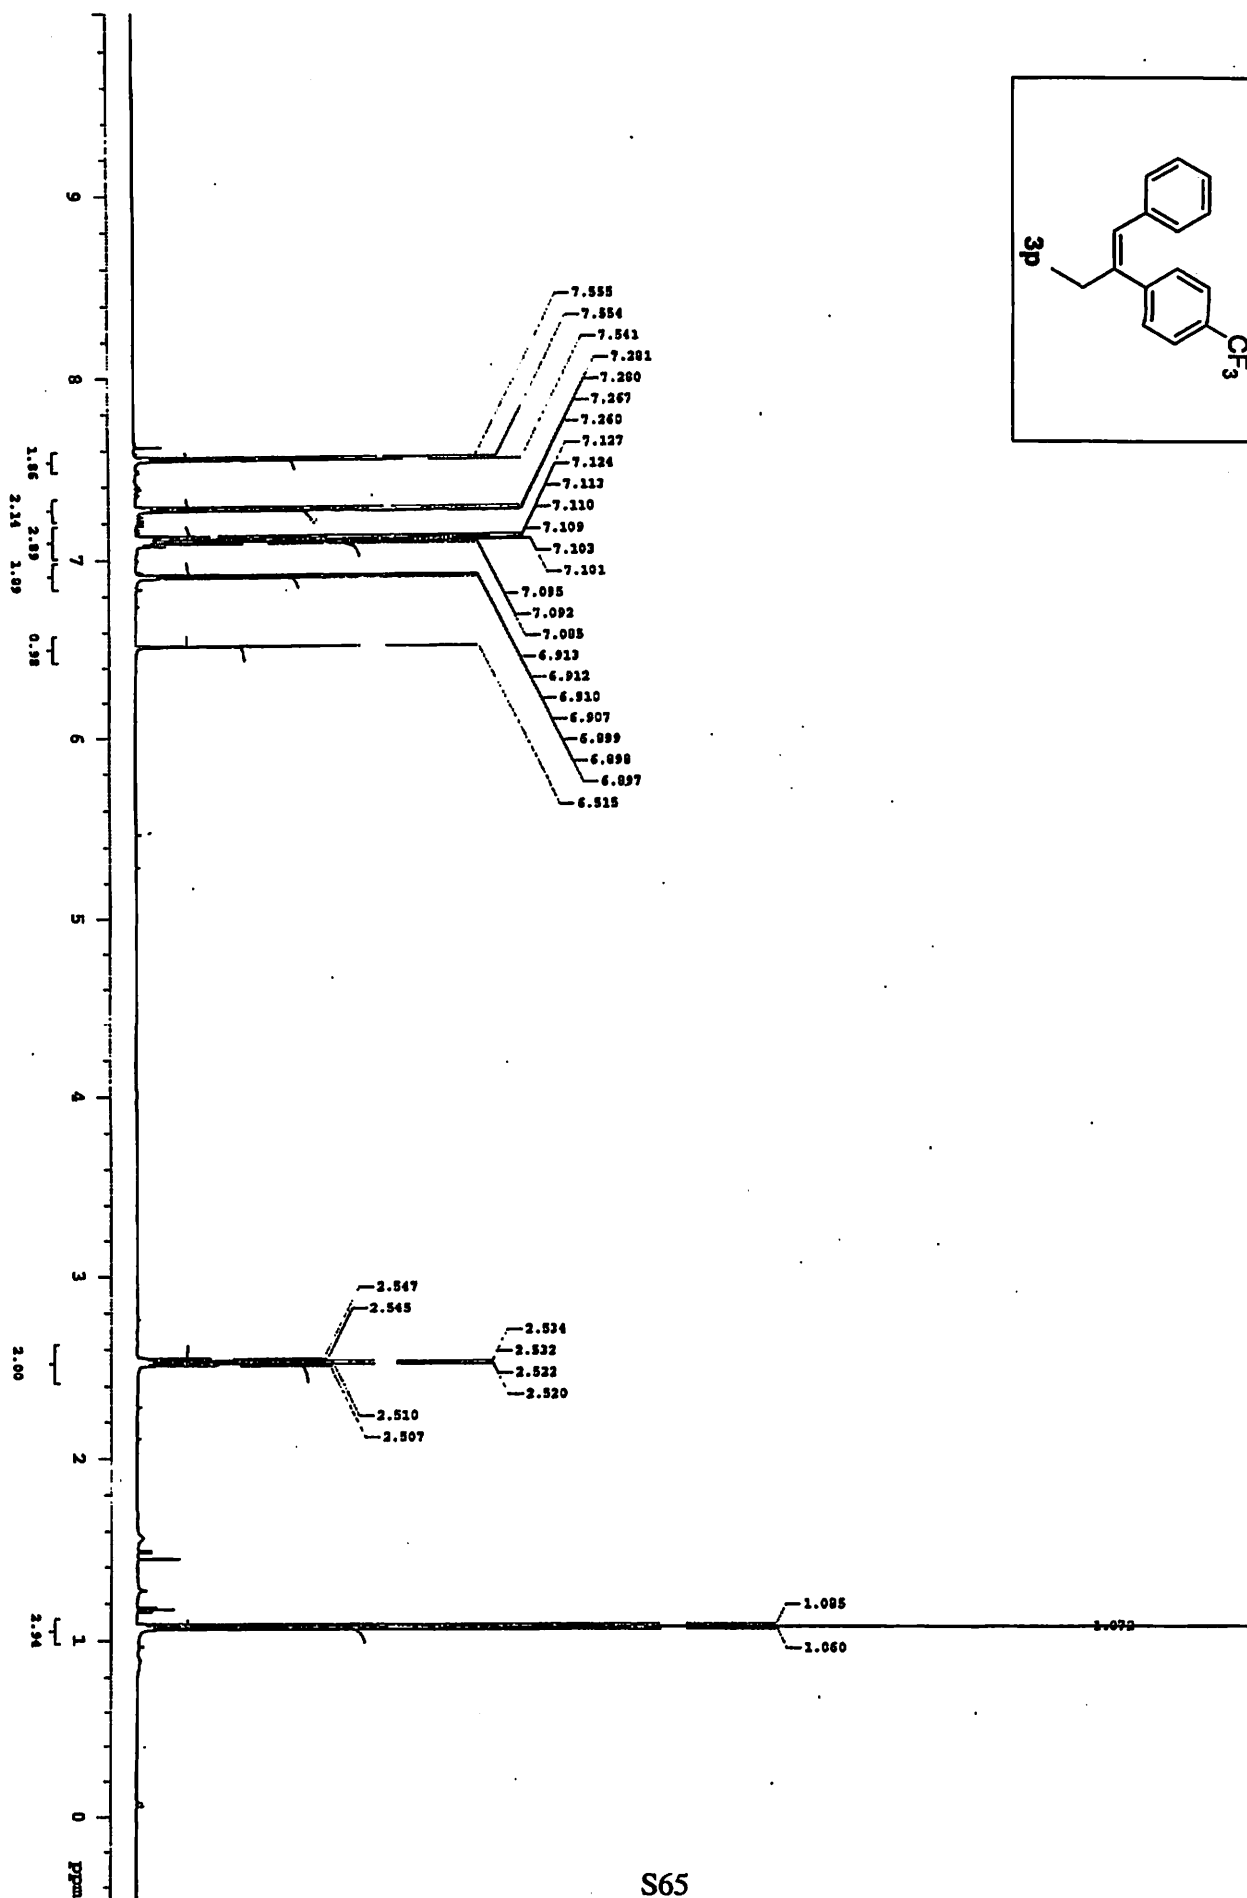

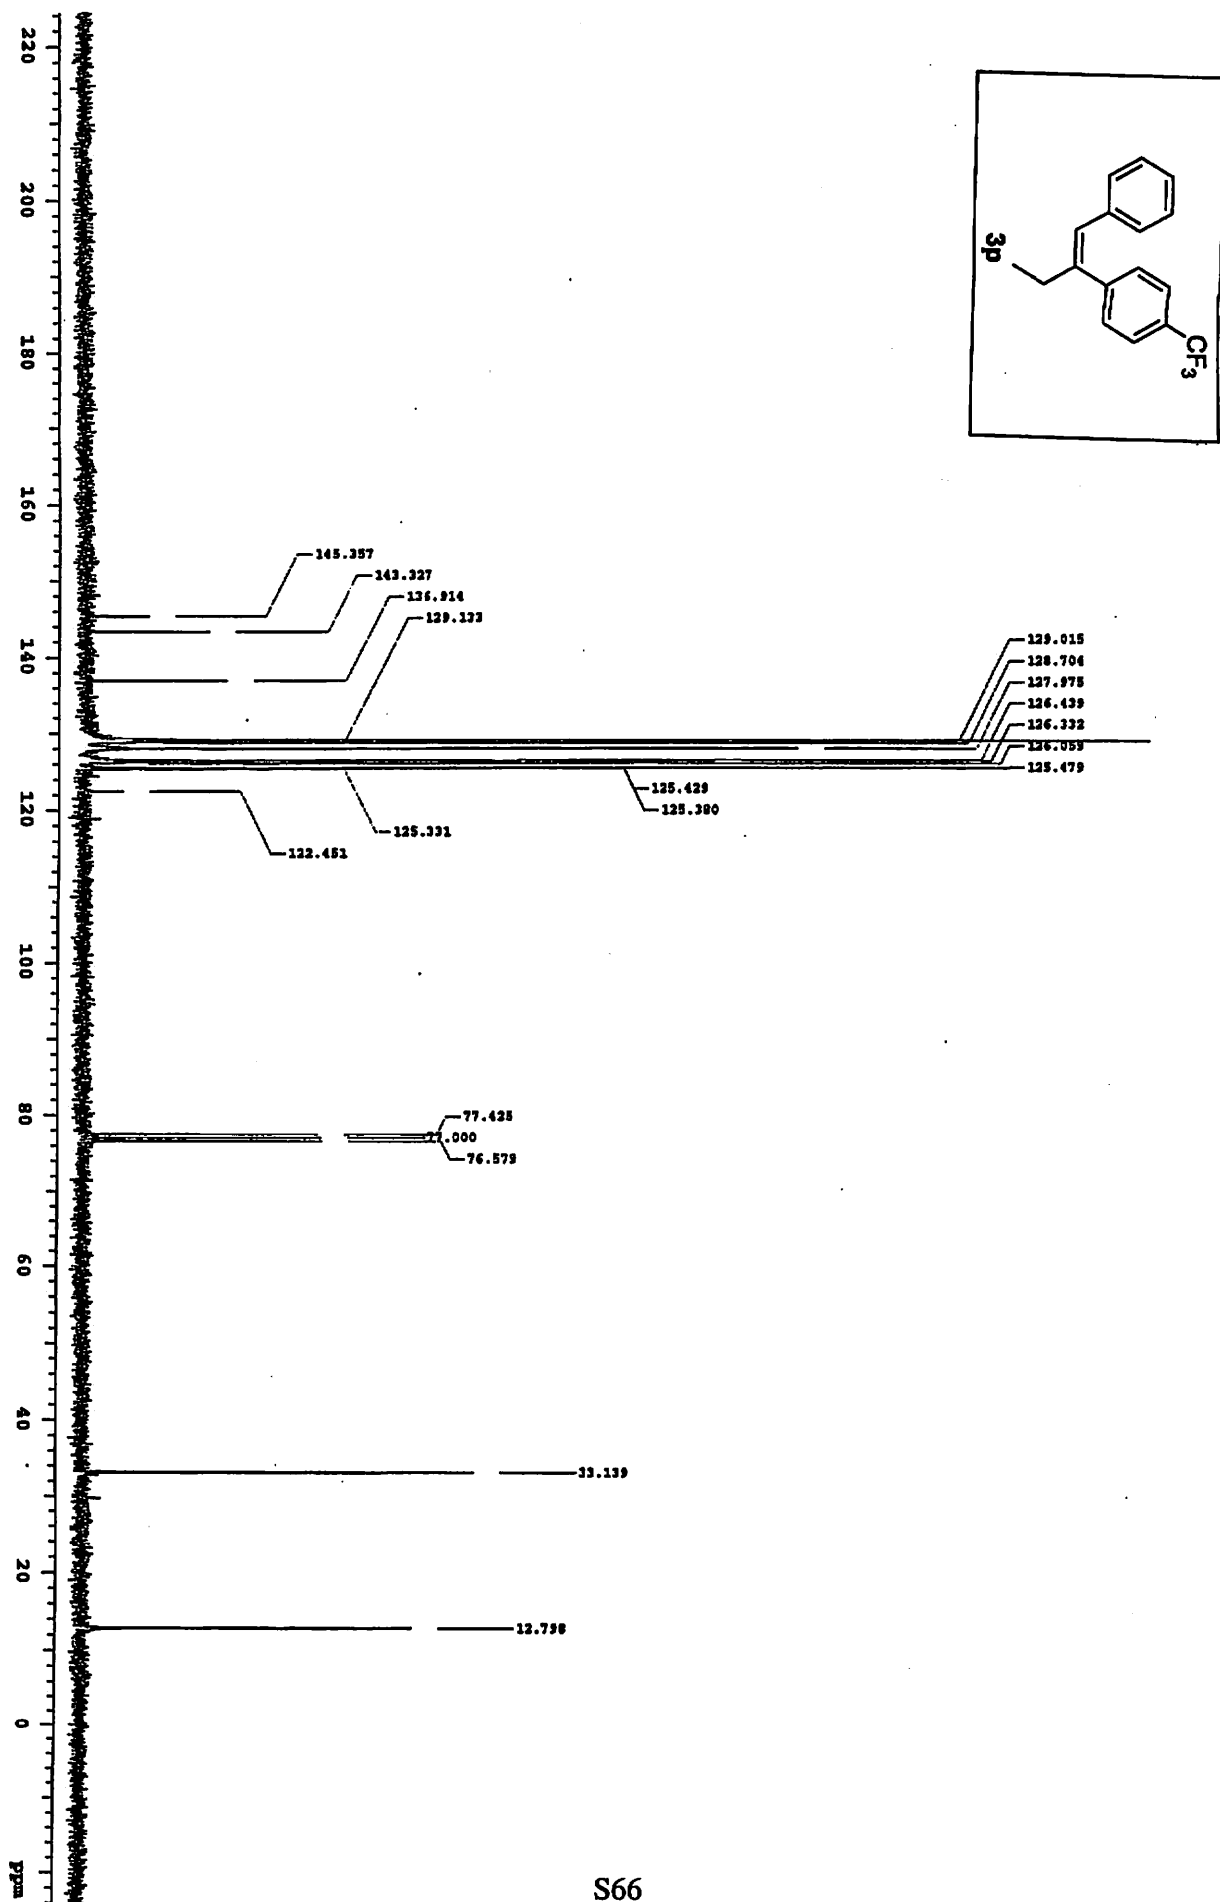

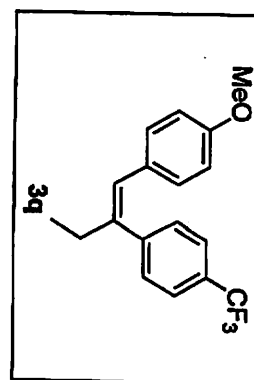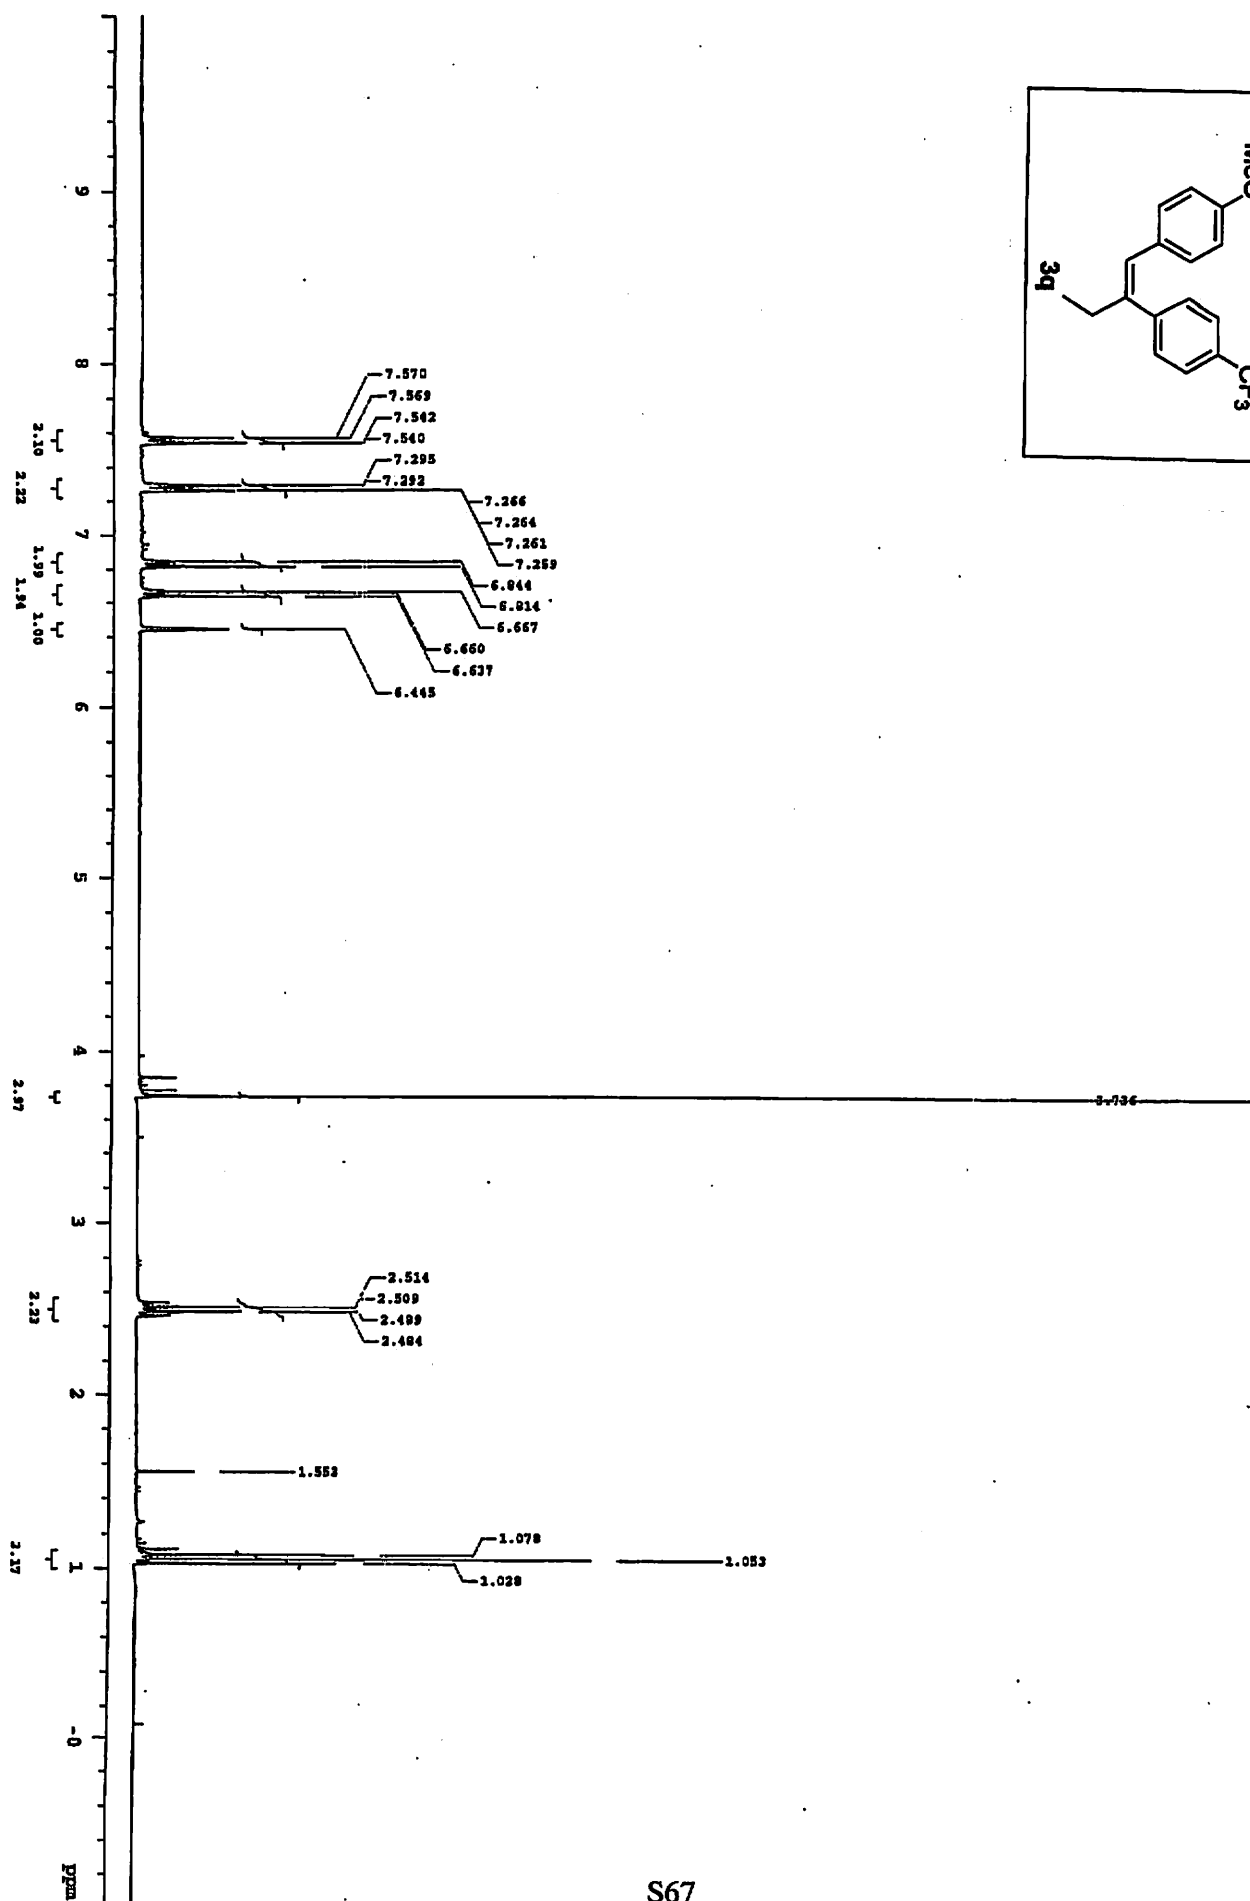

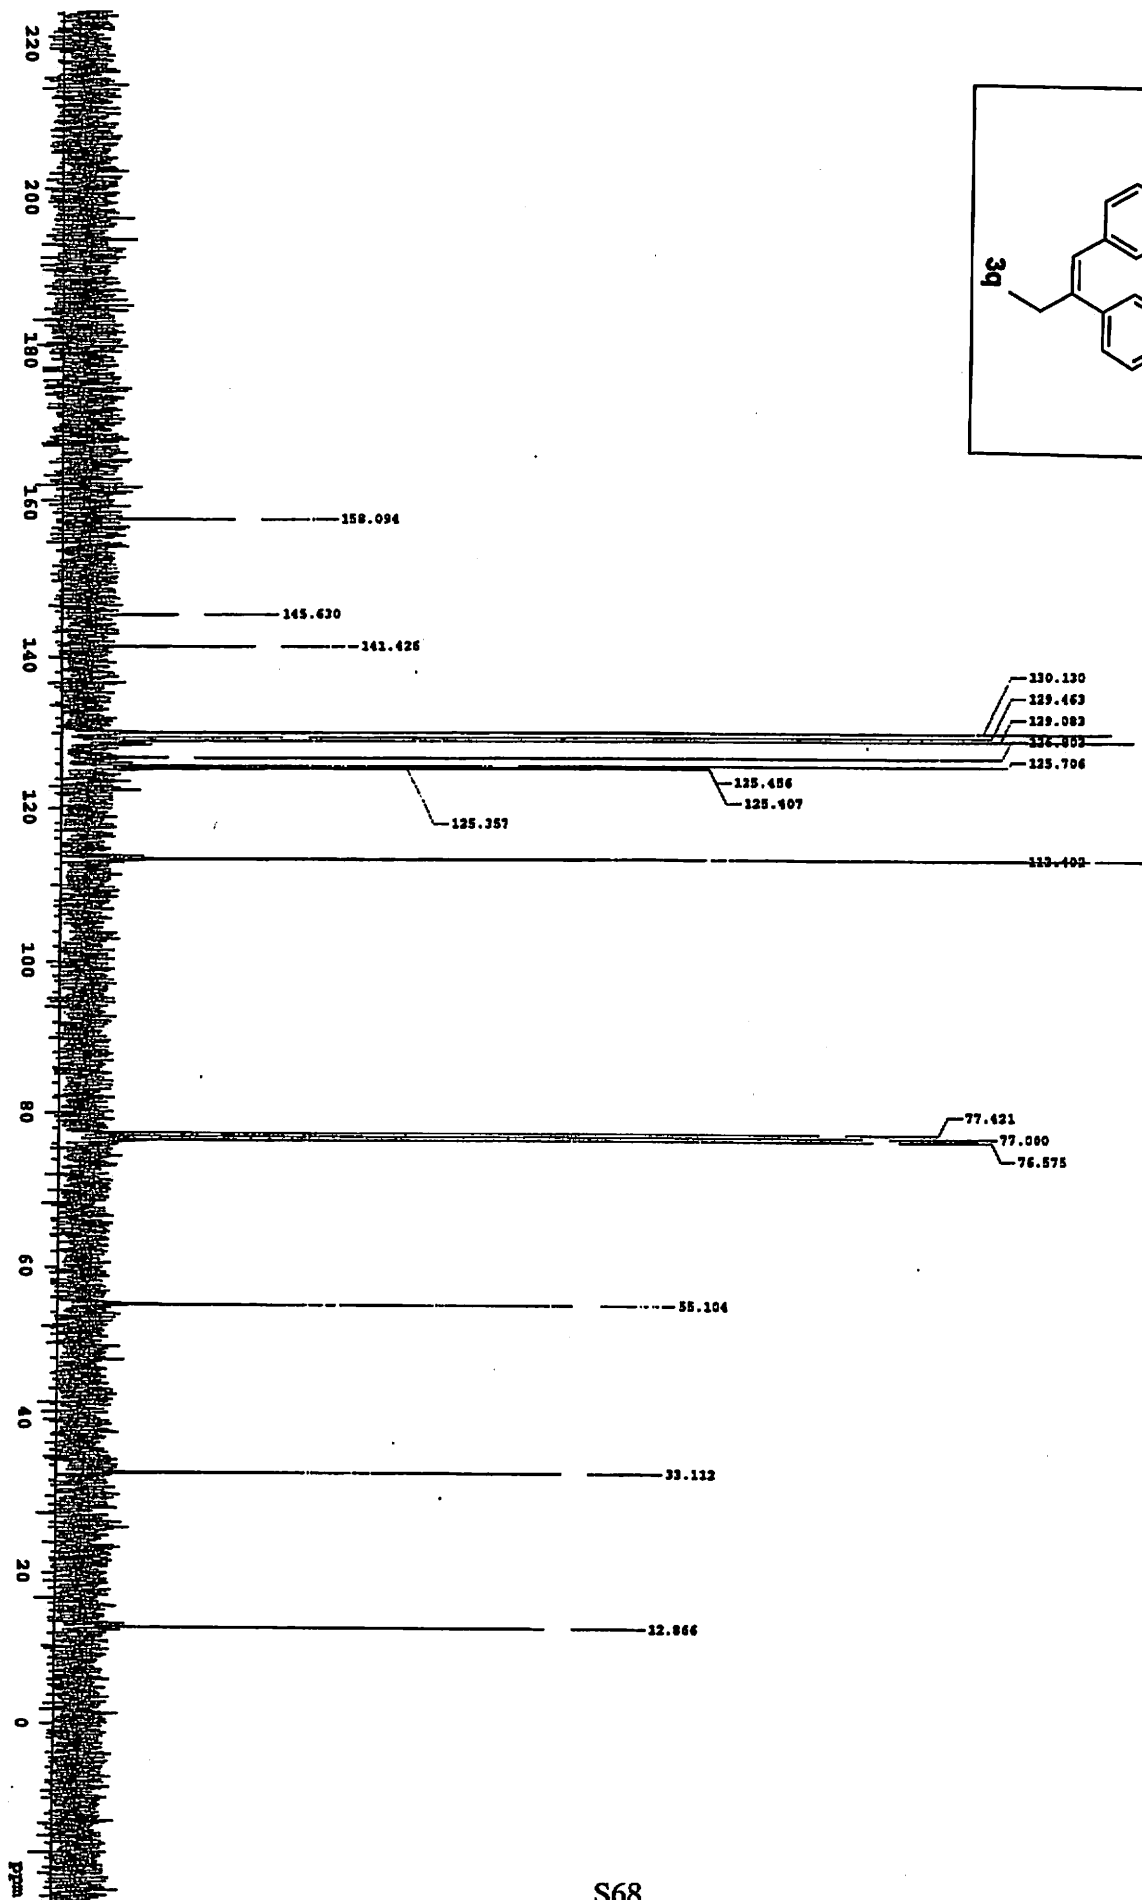

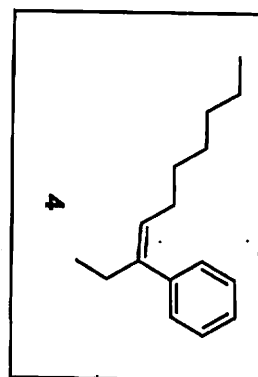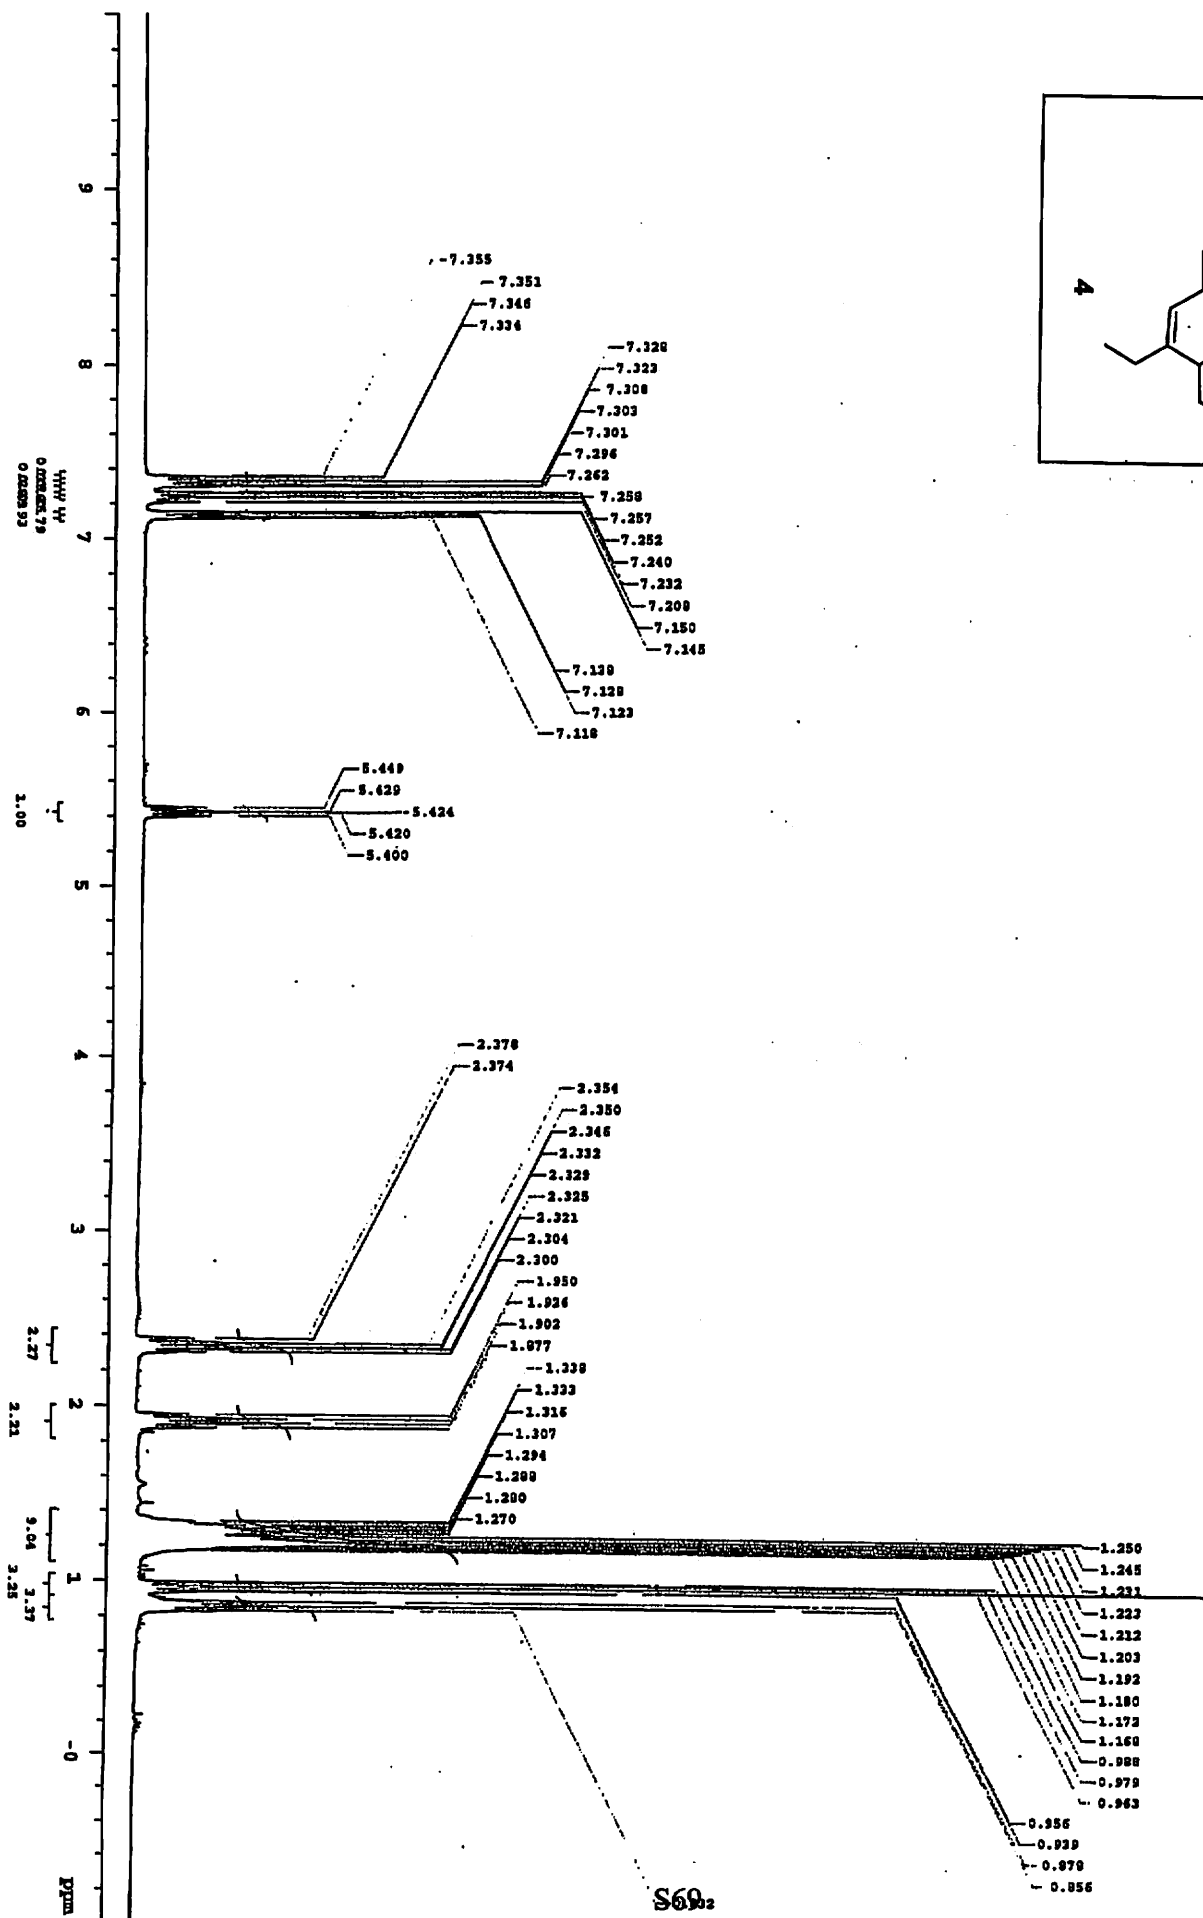

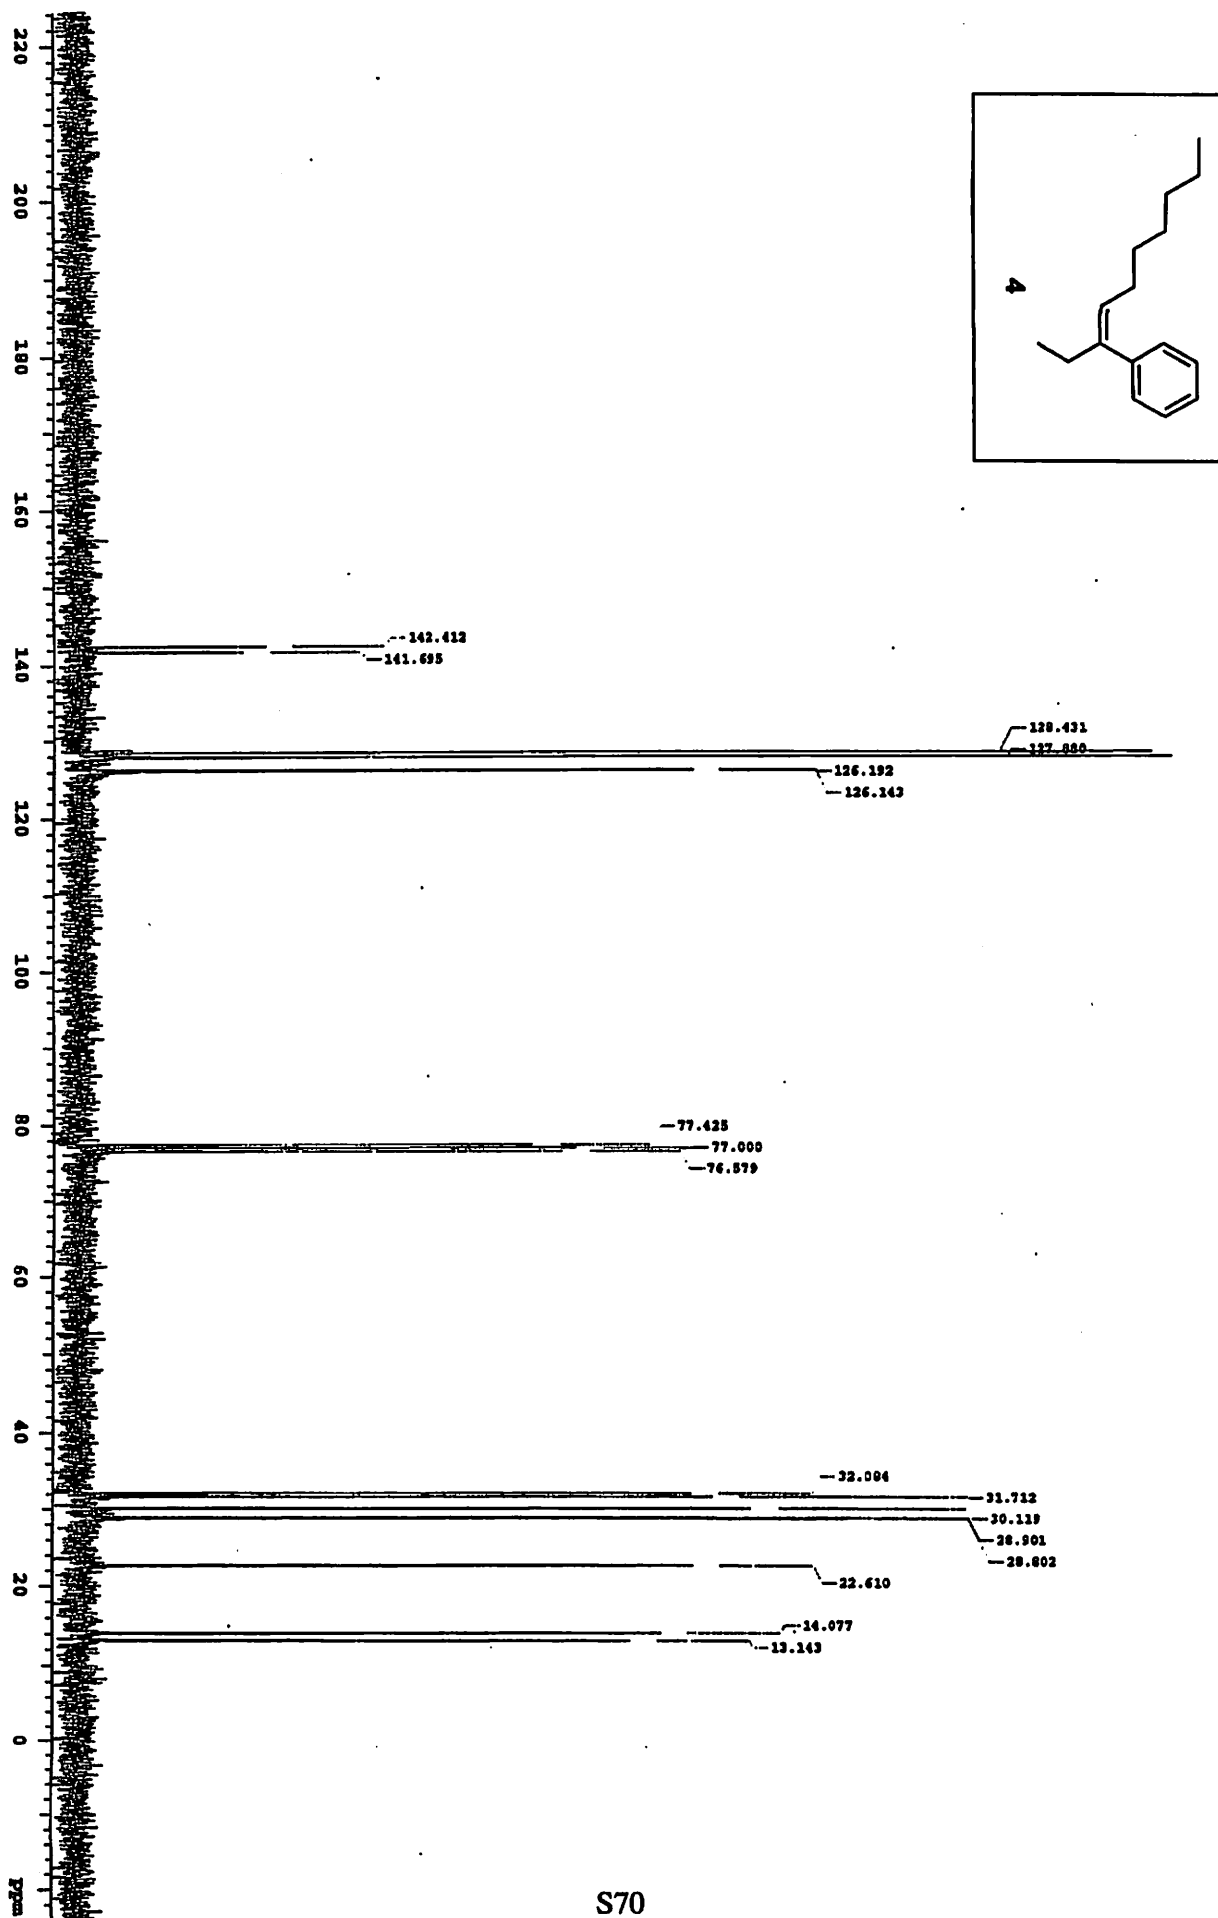

S70

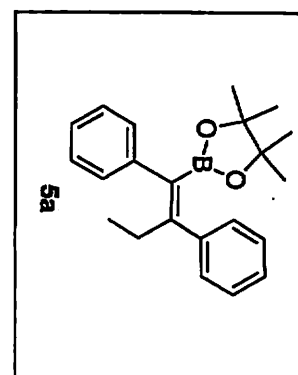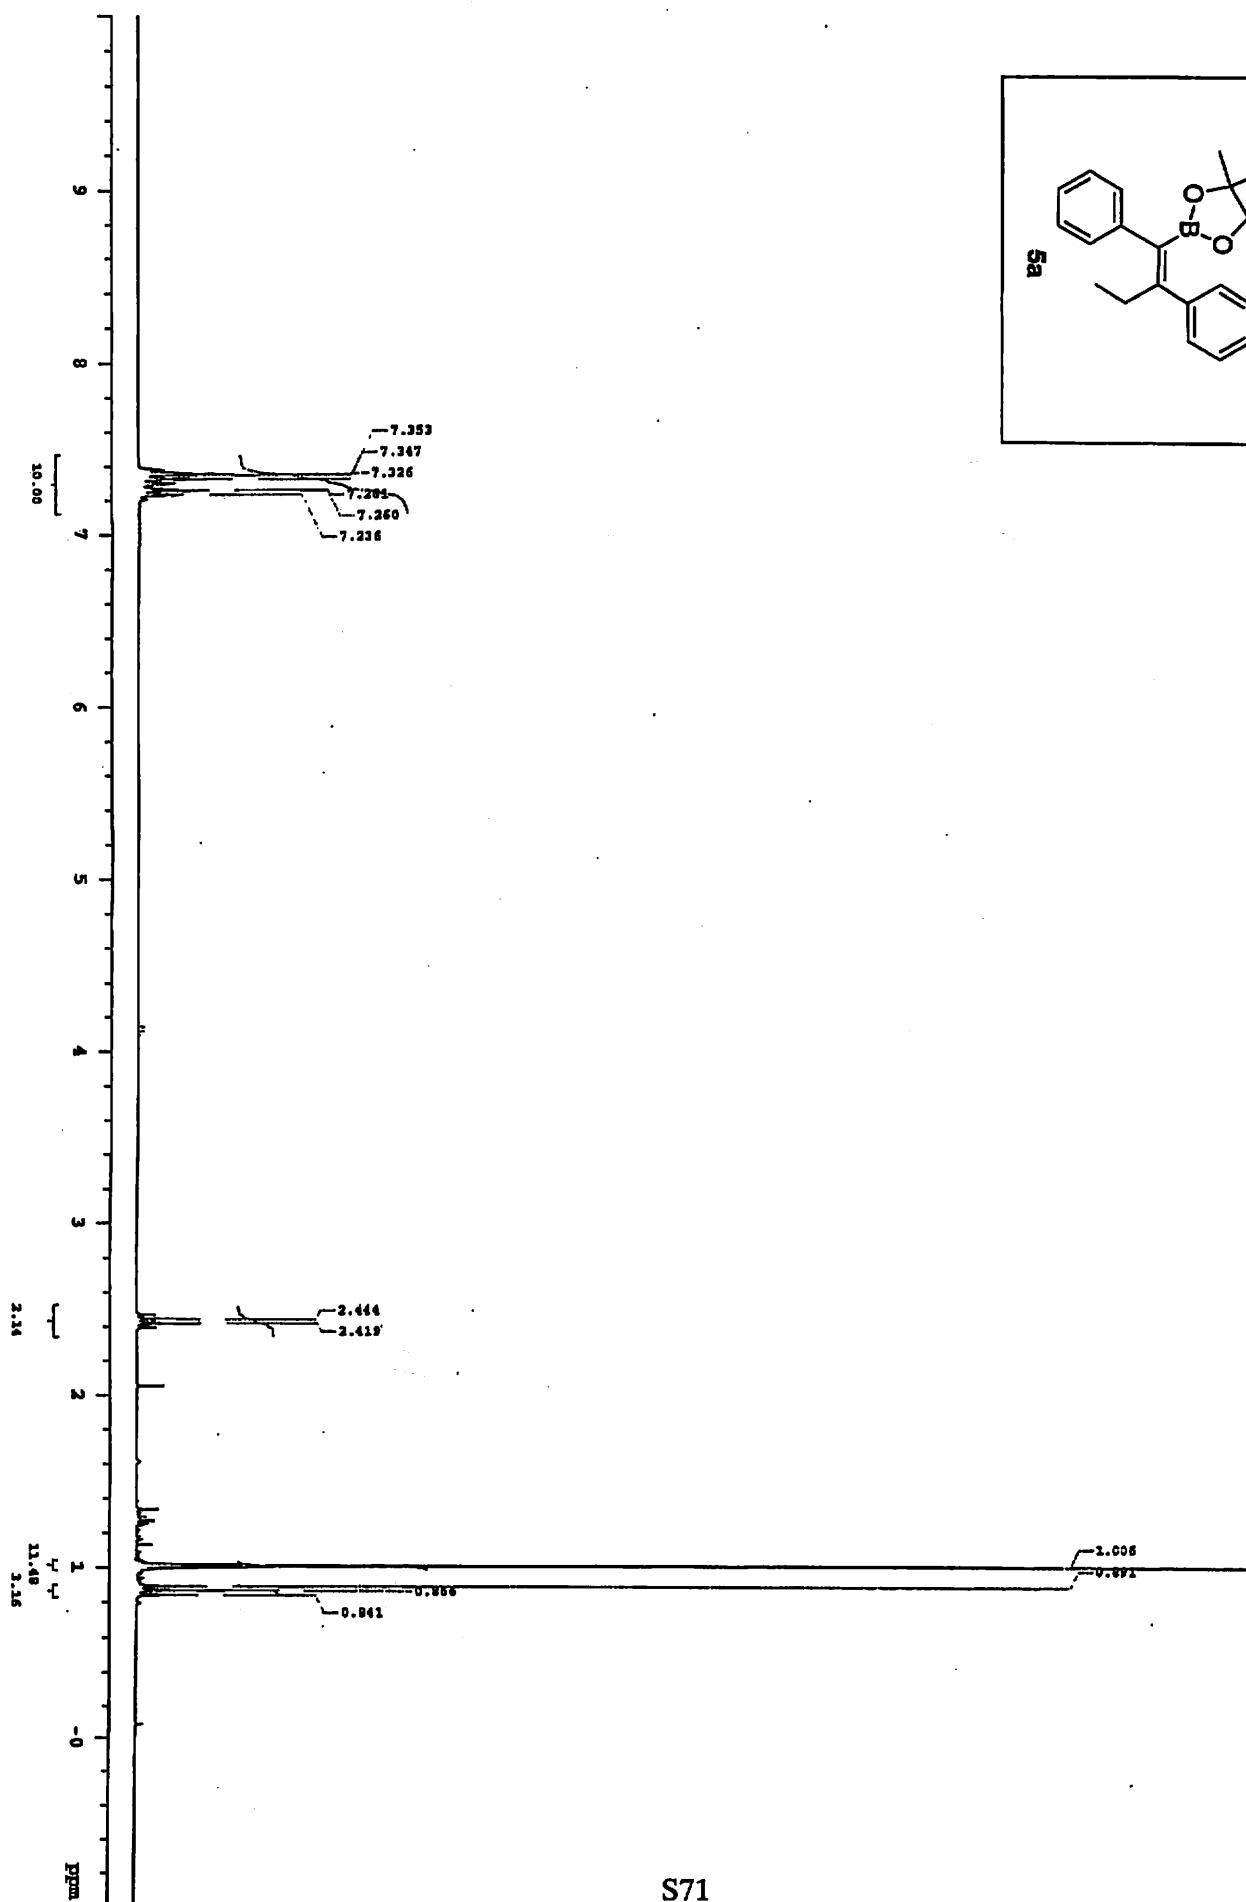

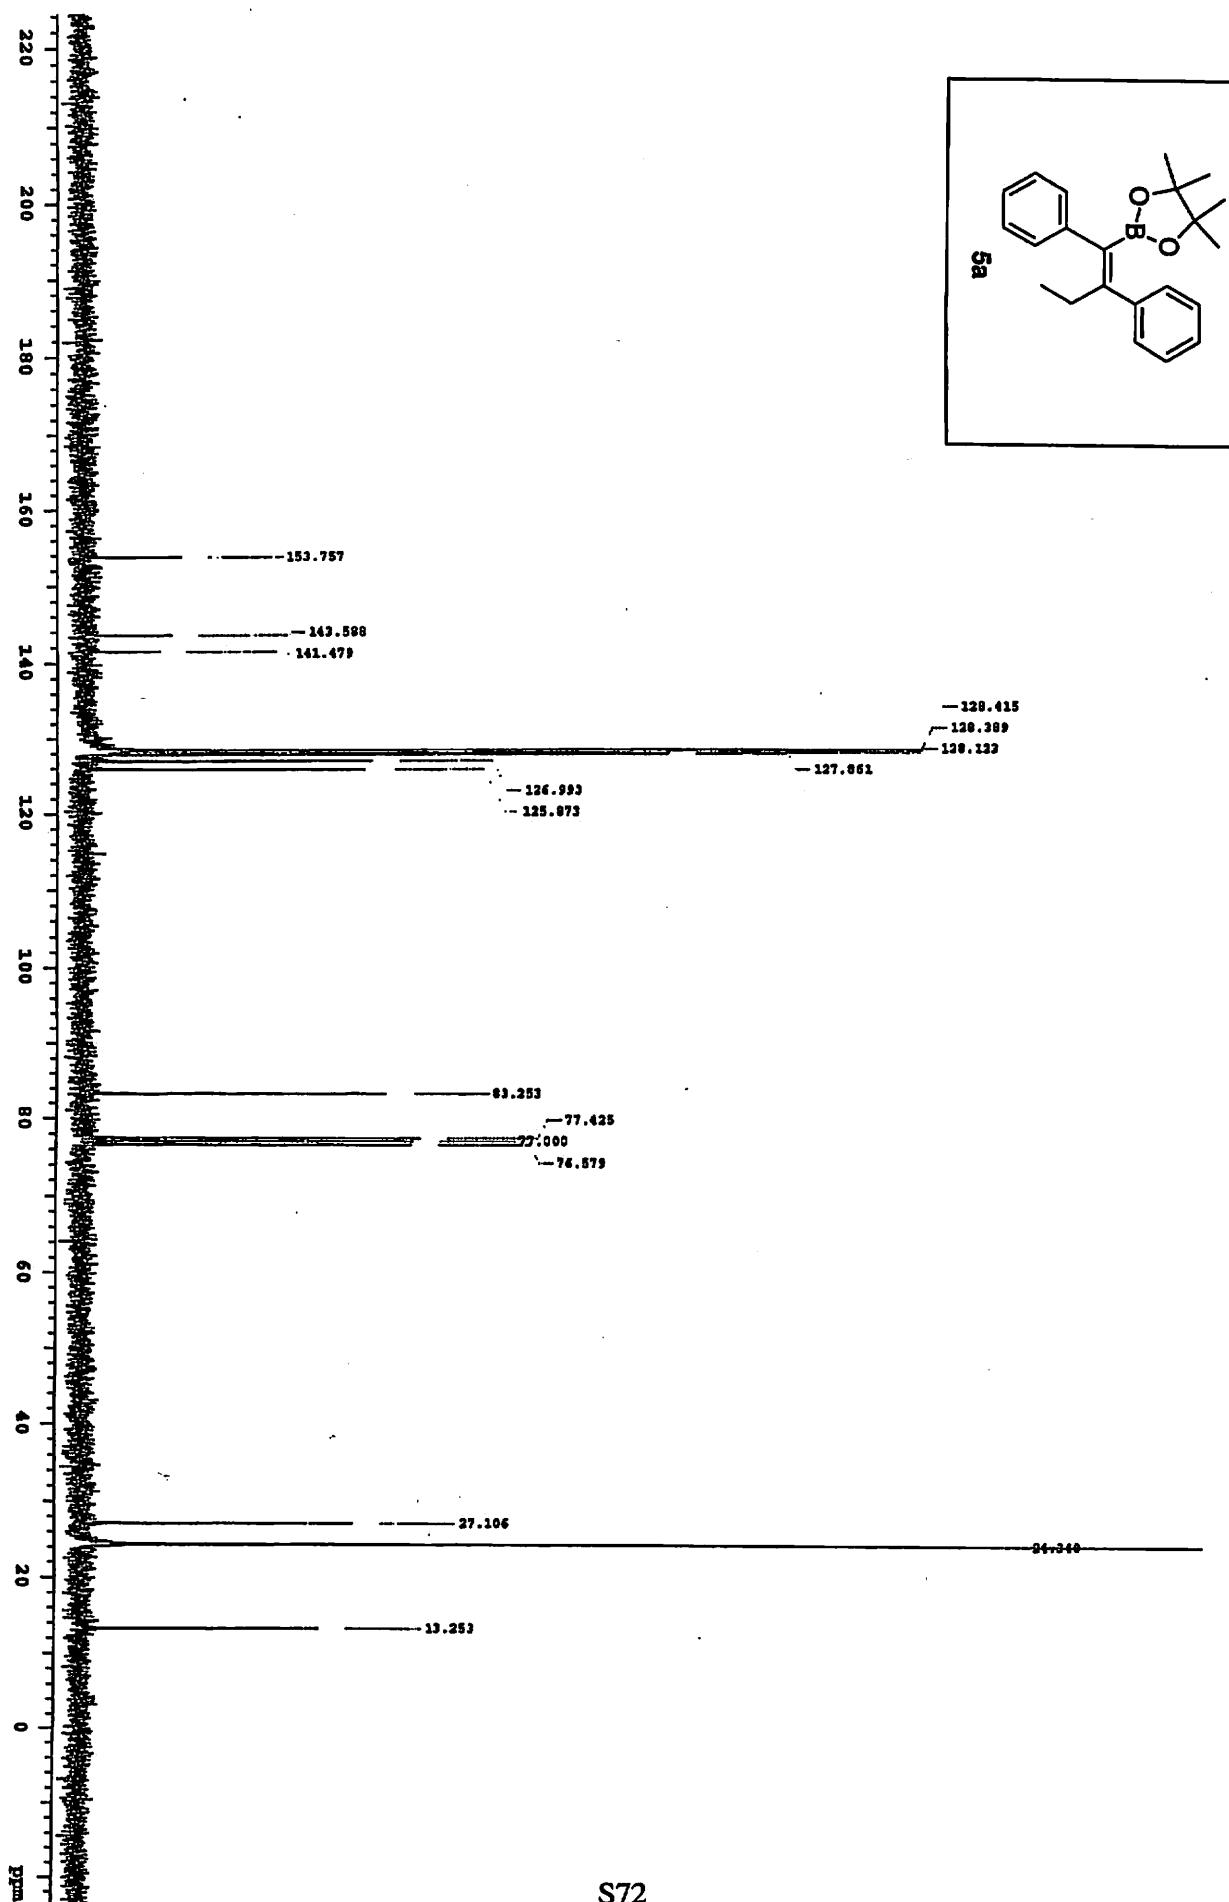

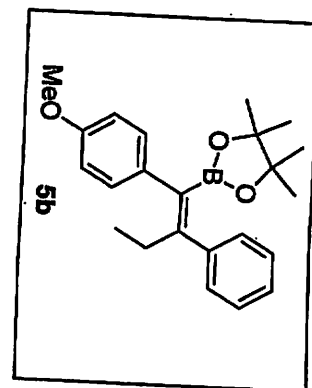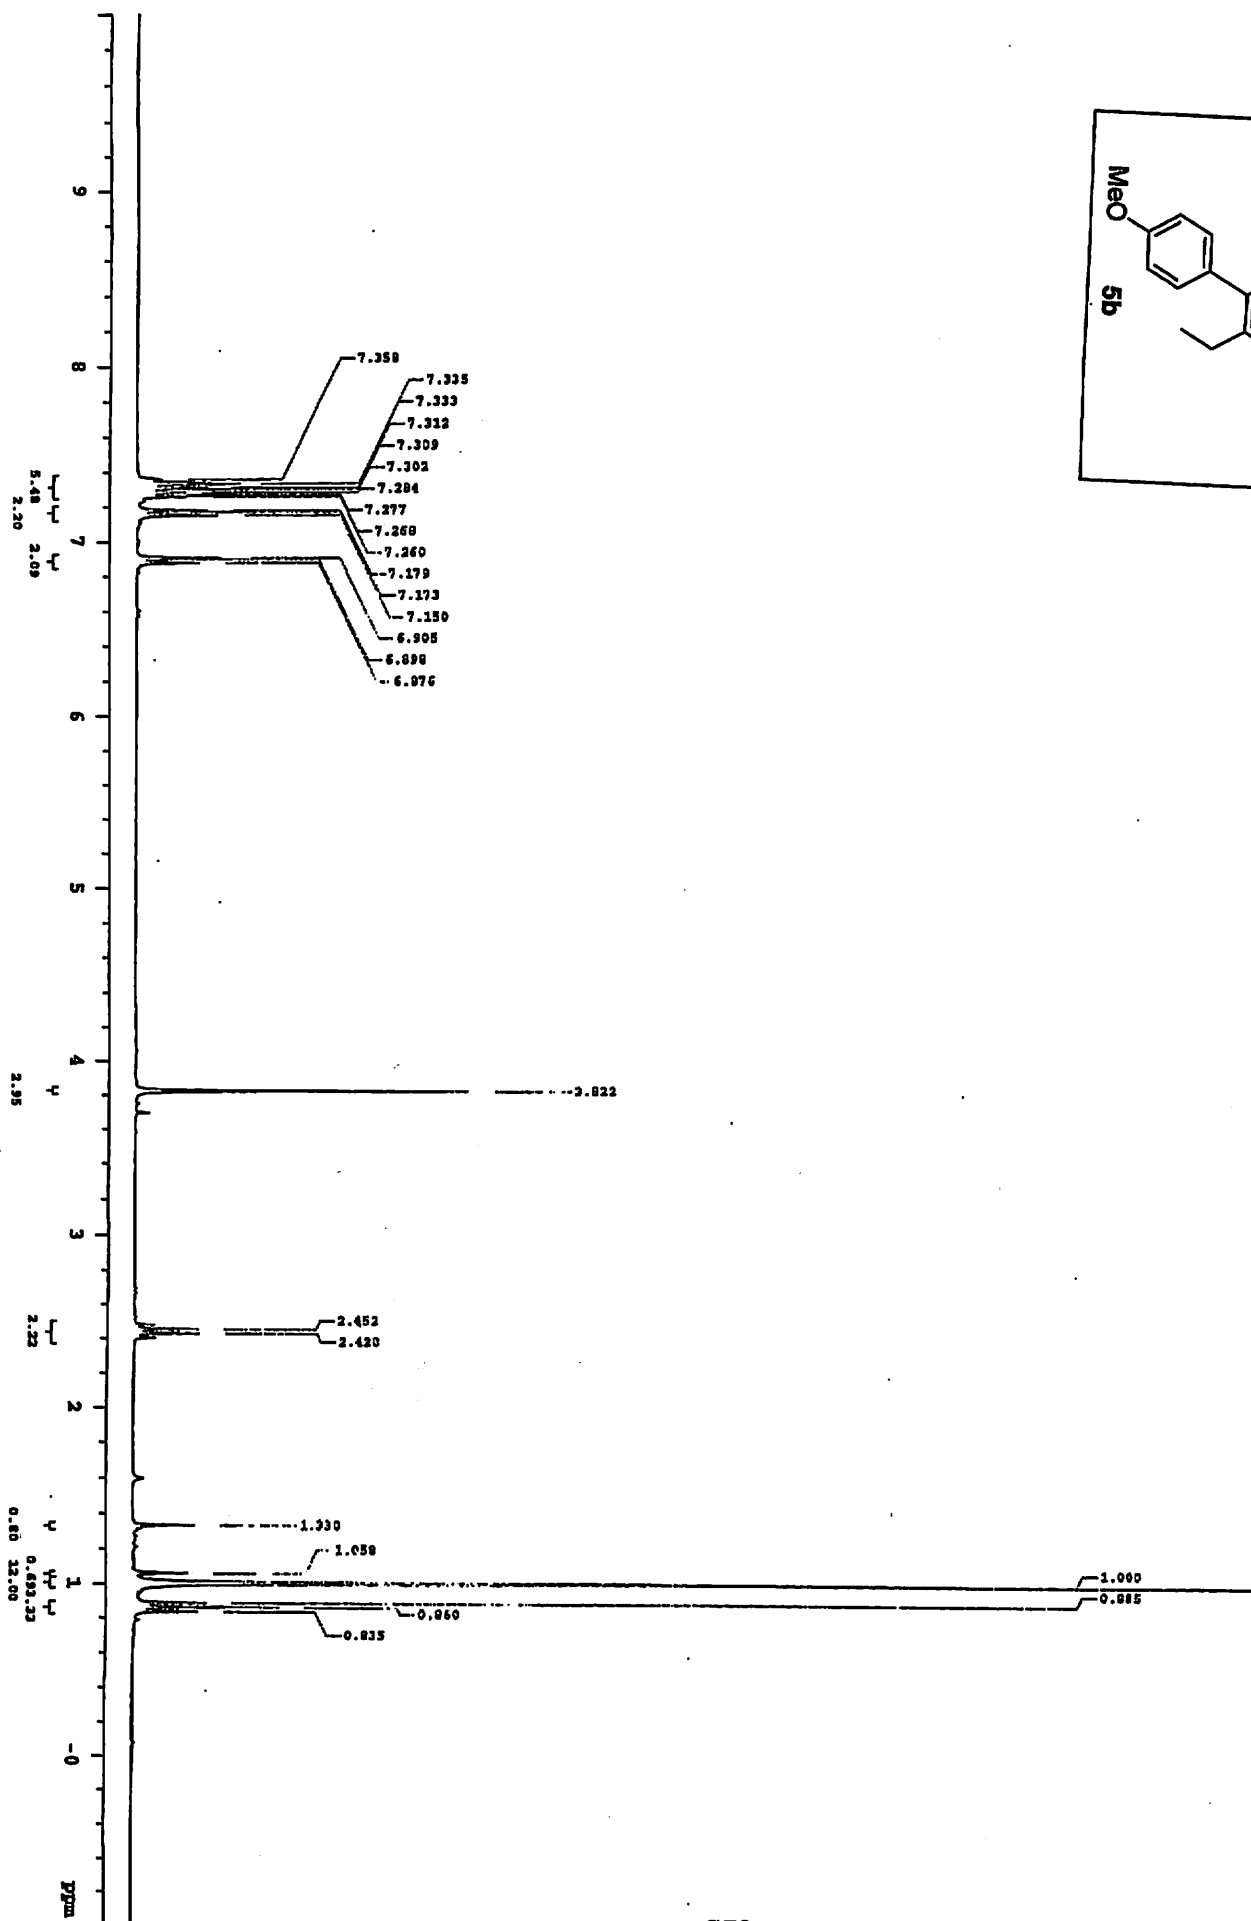

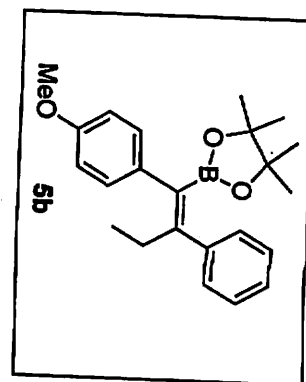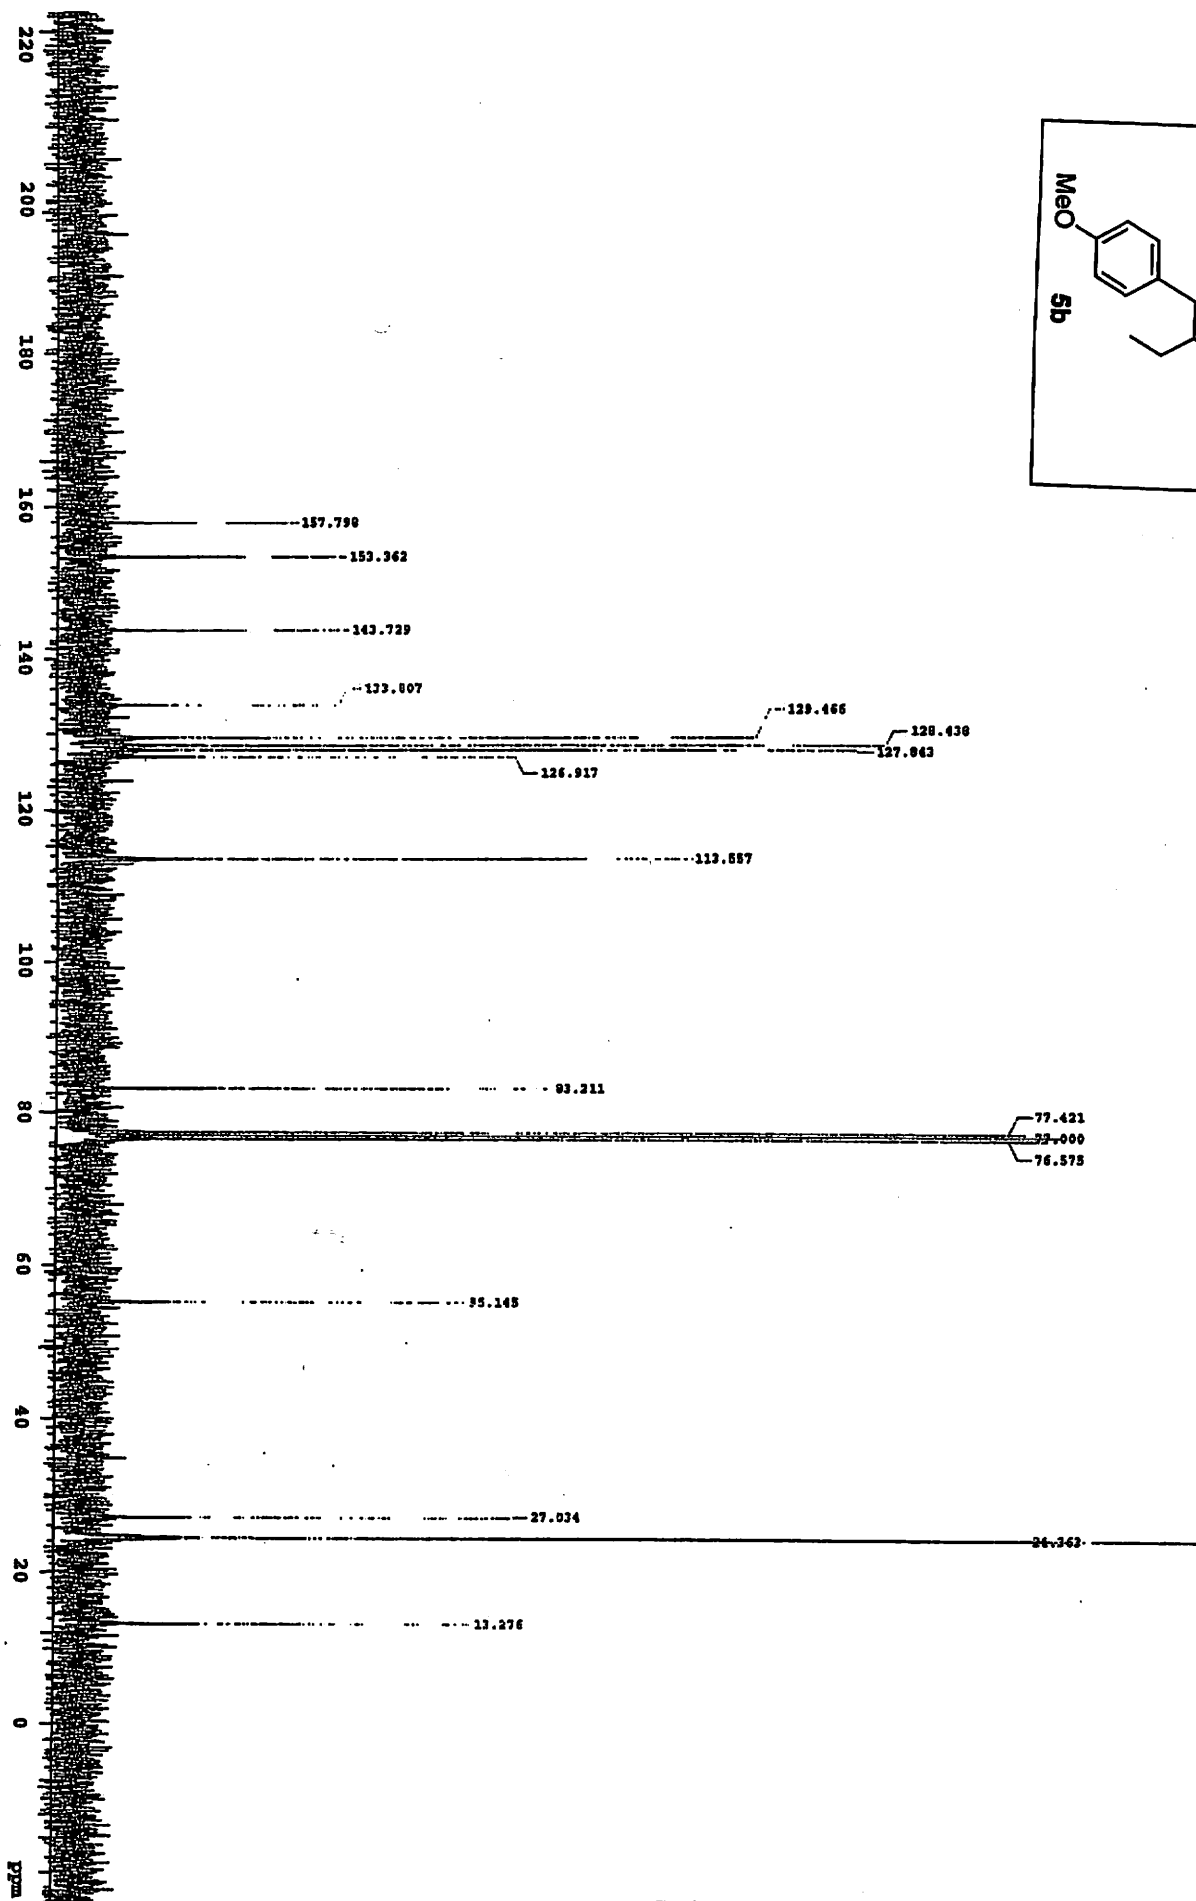

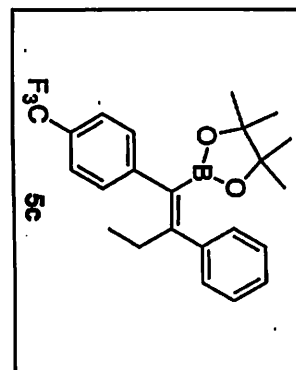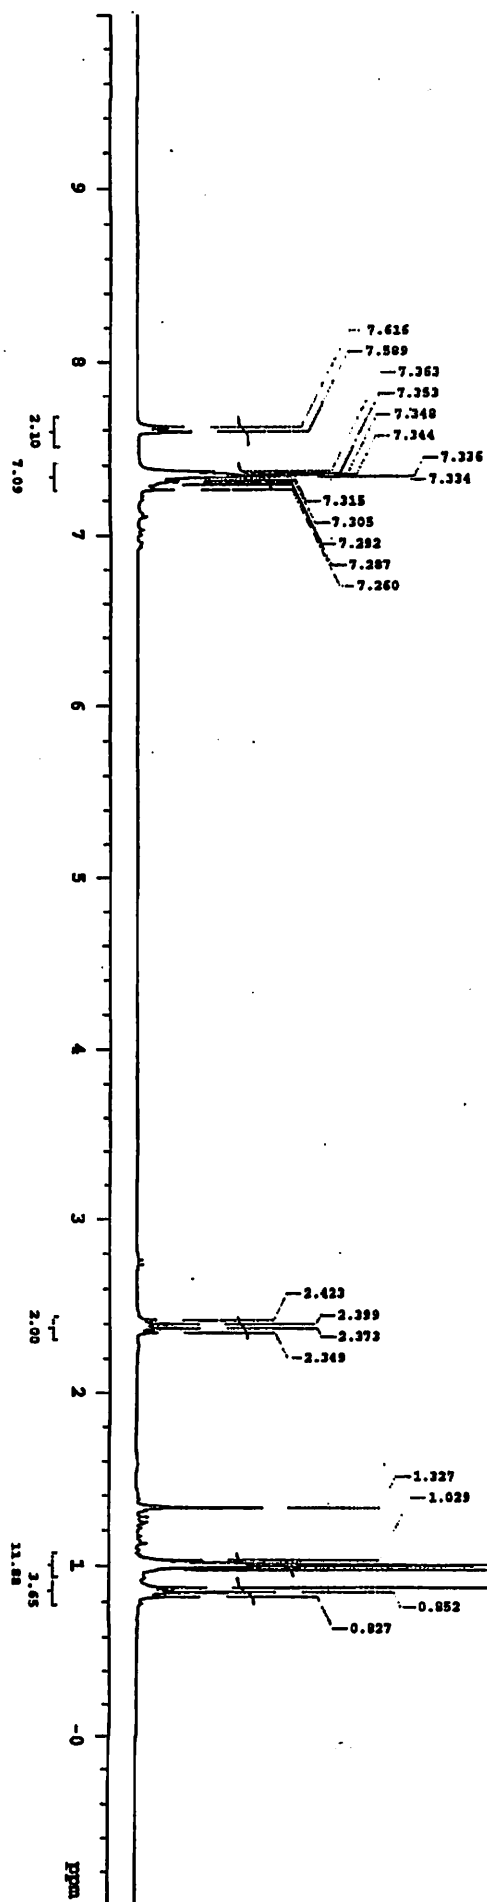

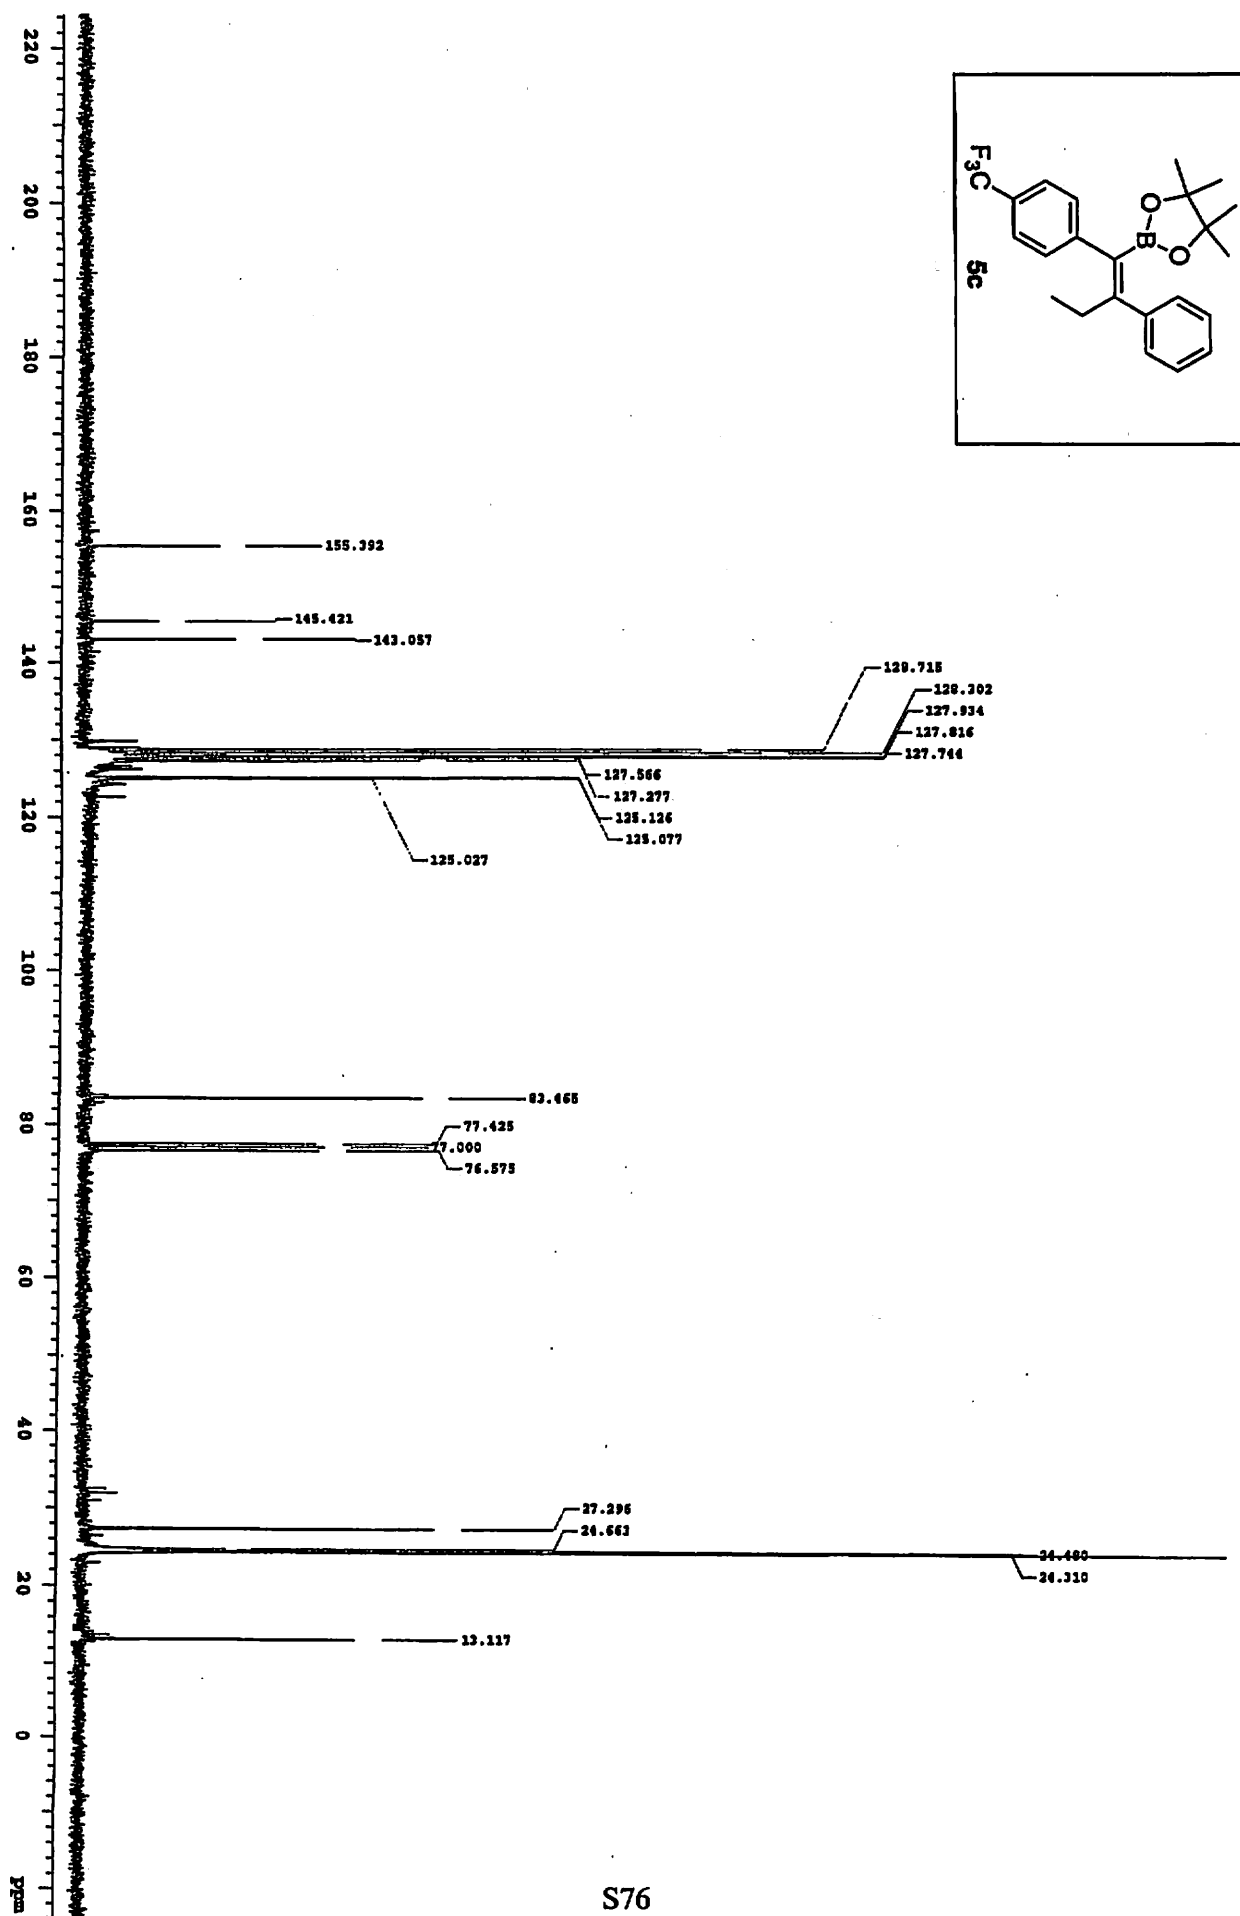

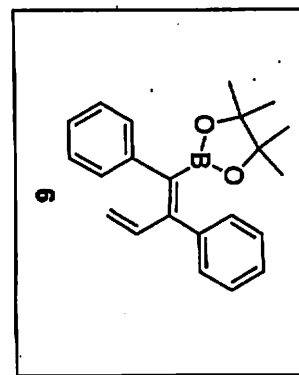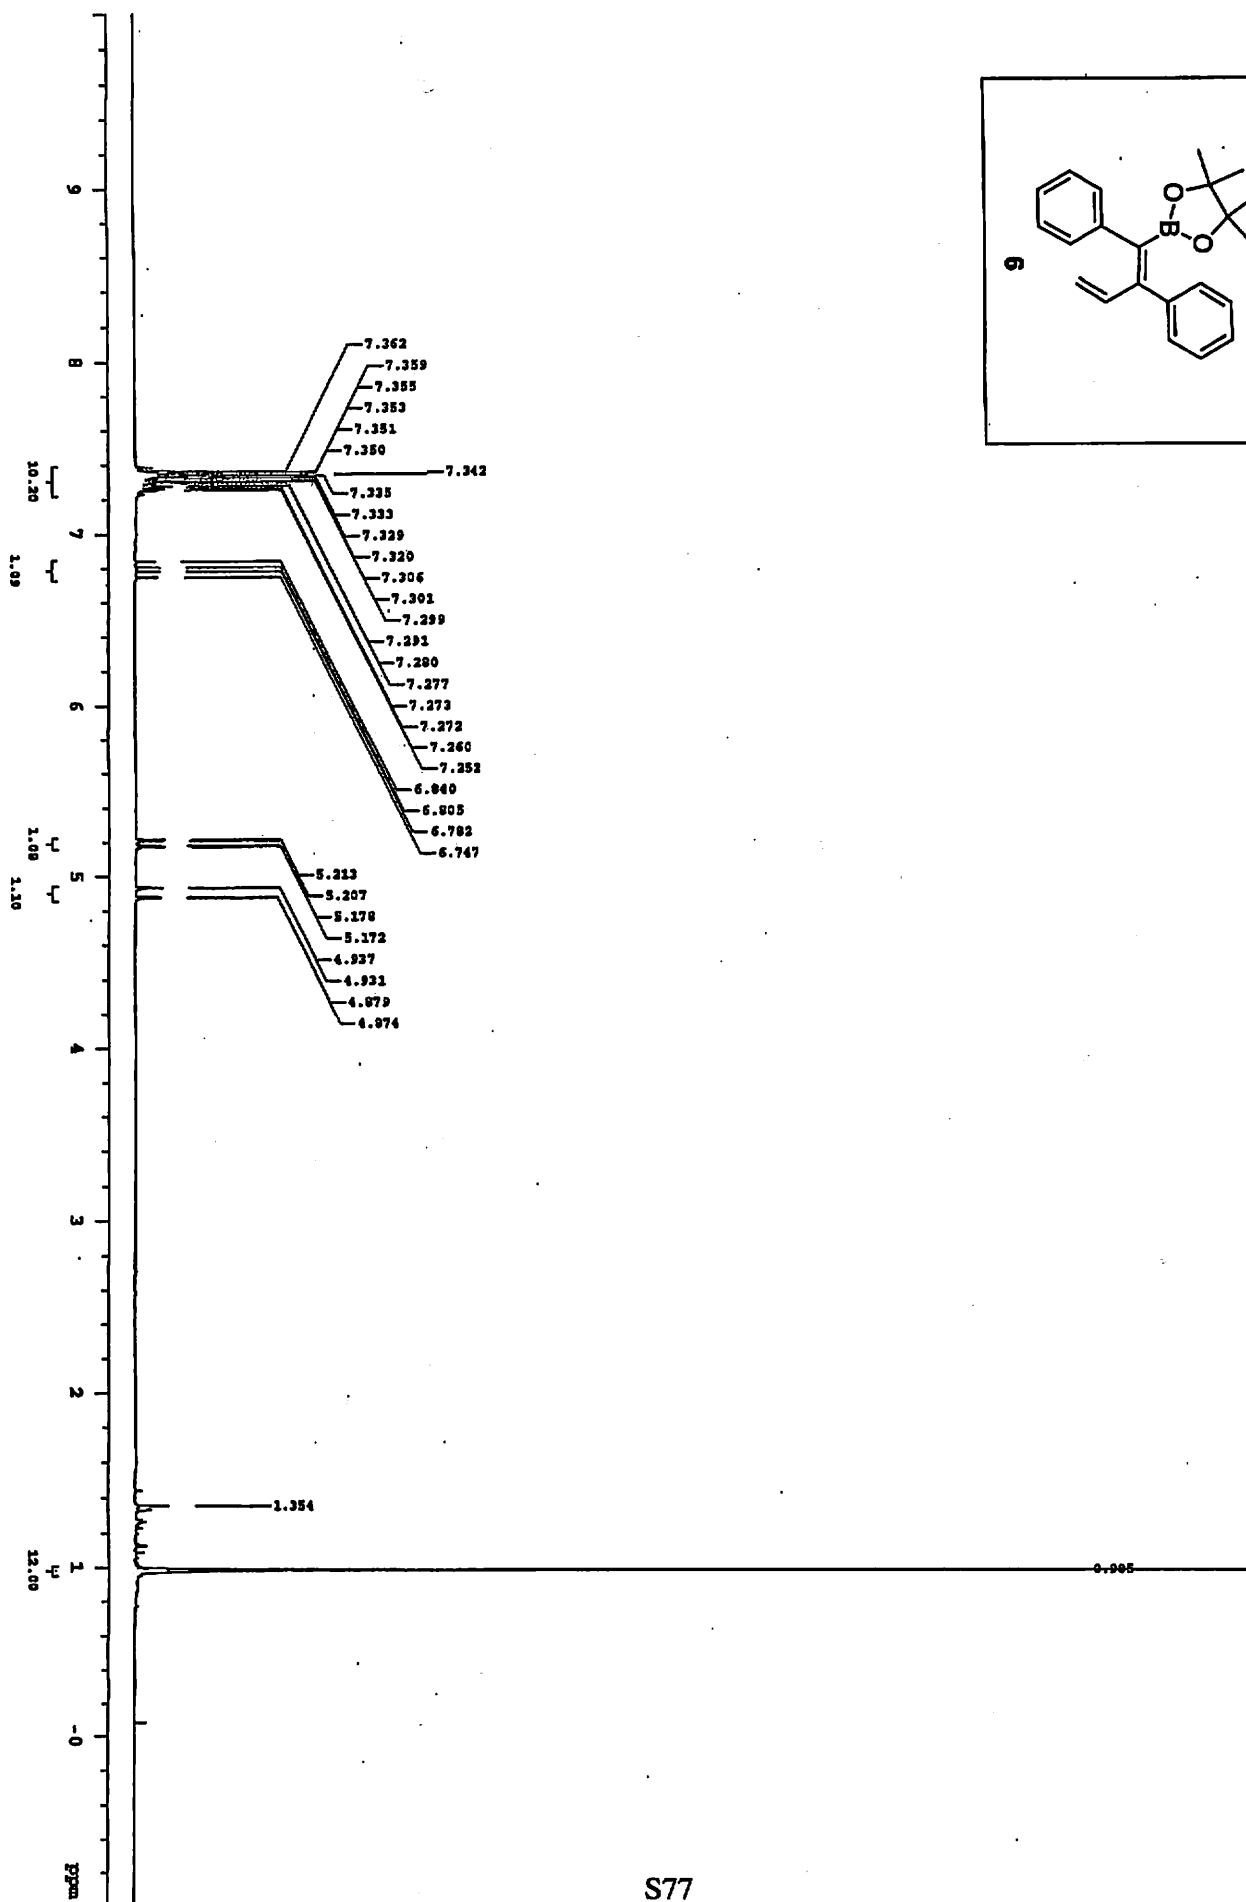

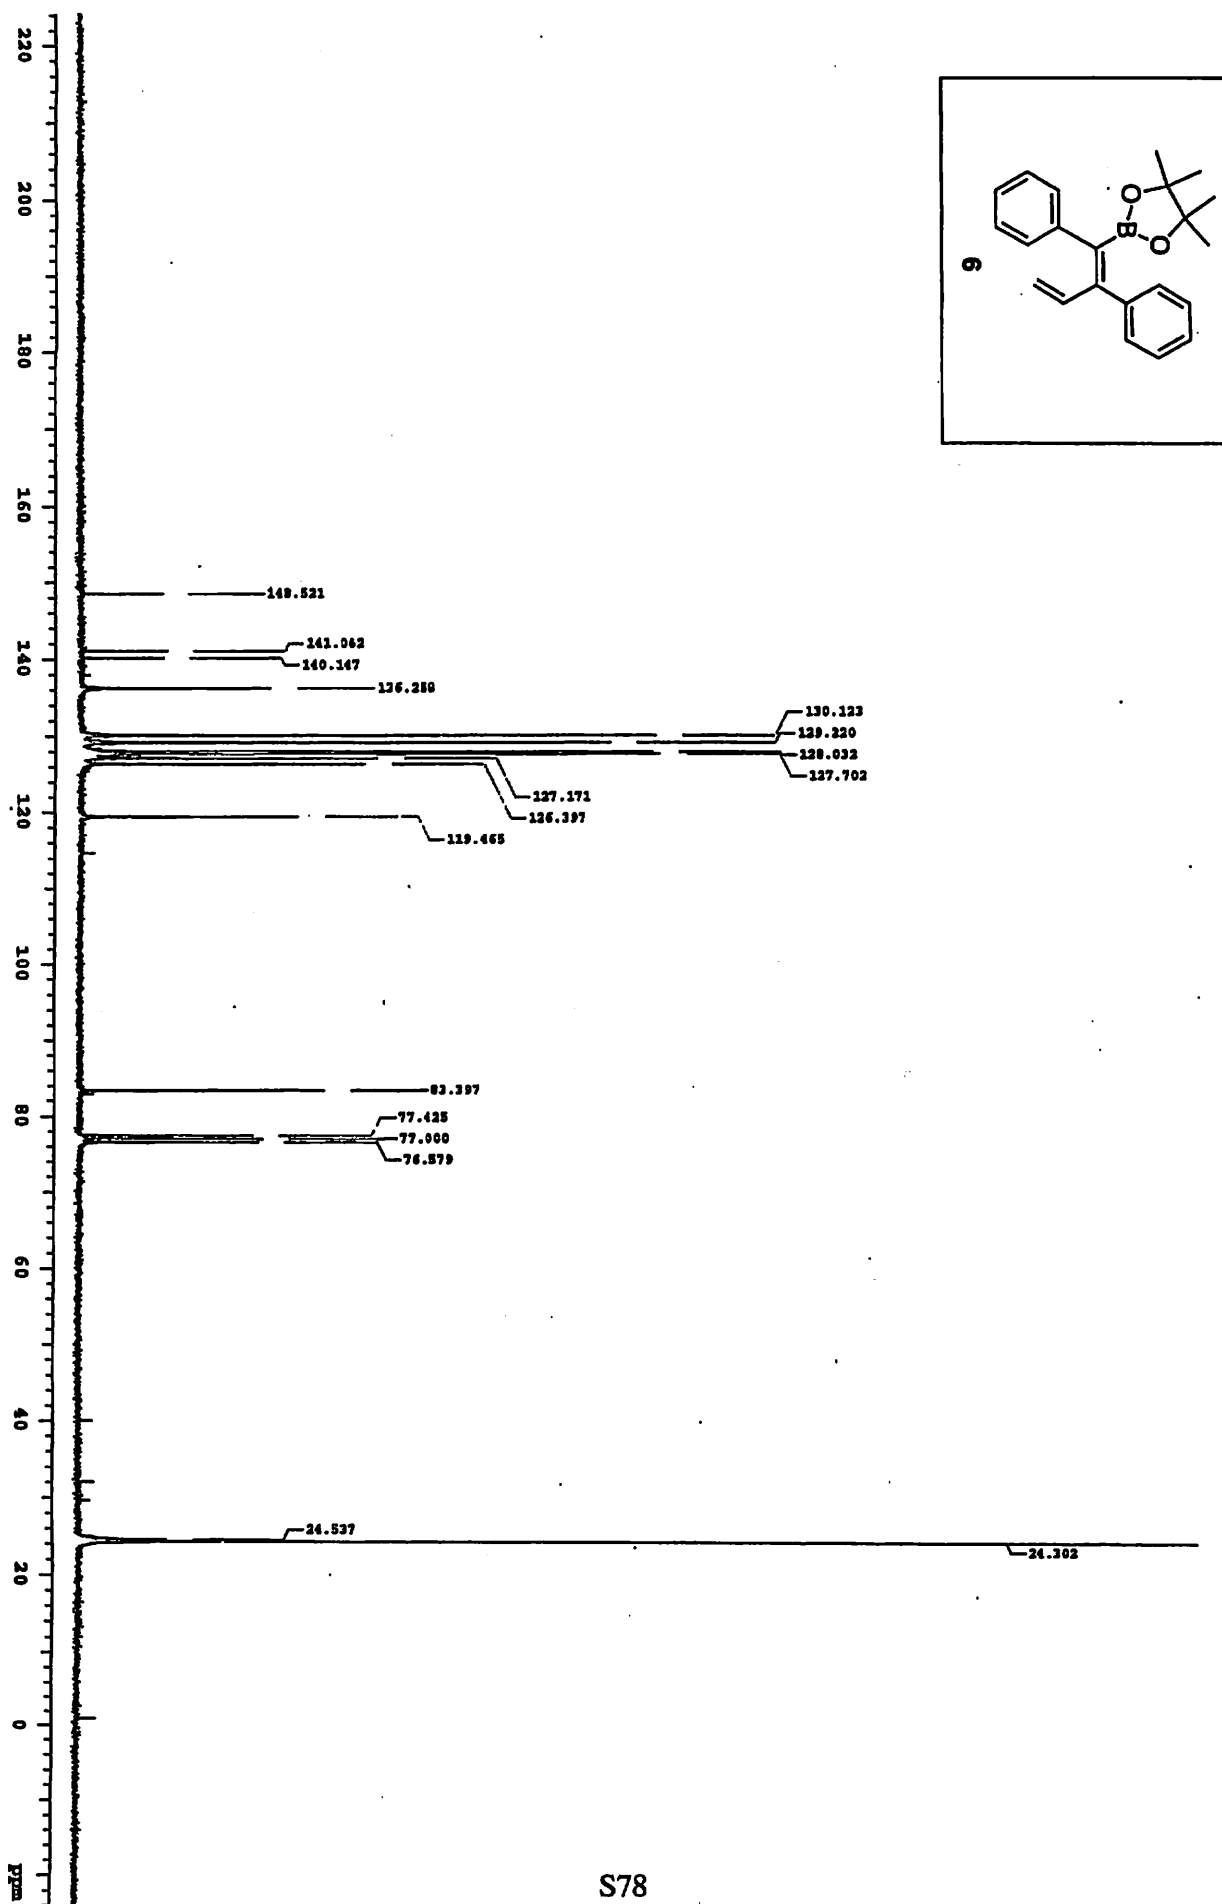

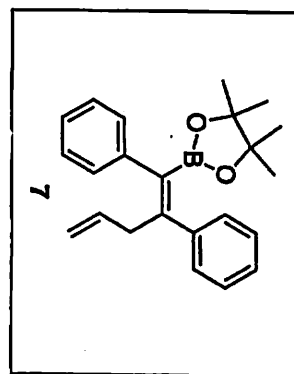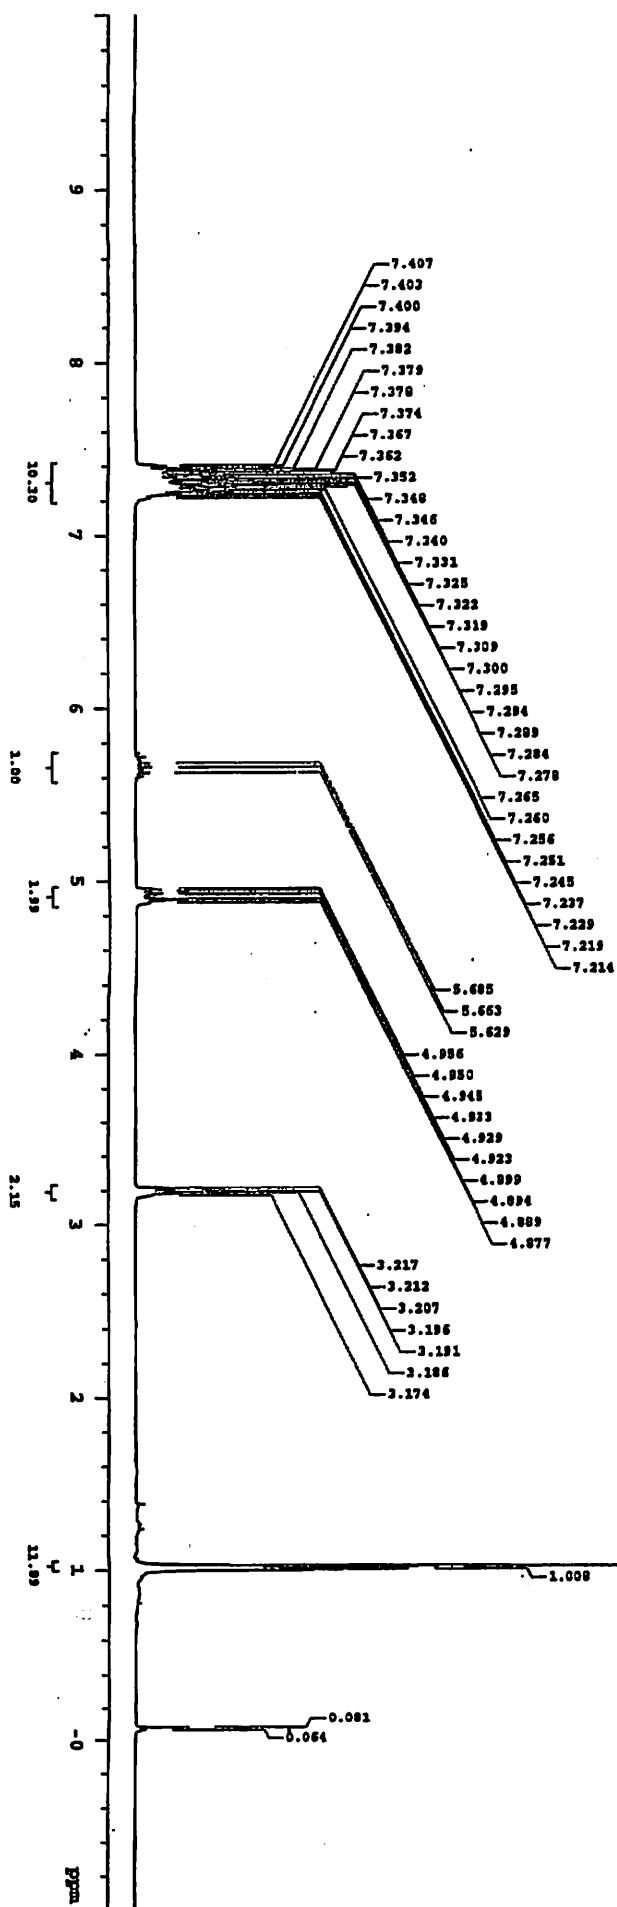

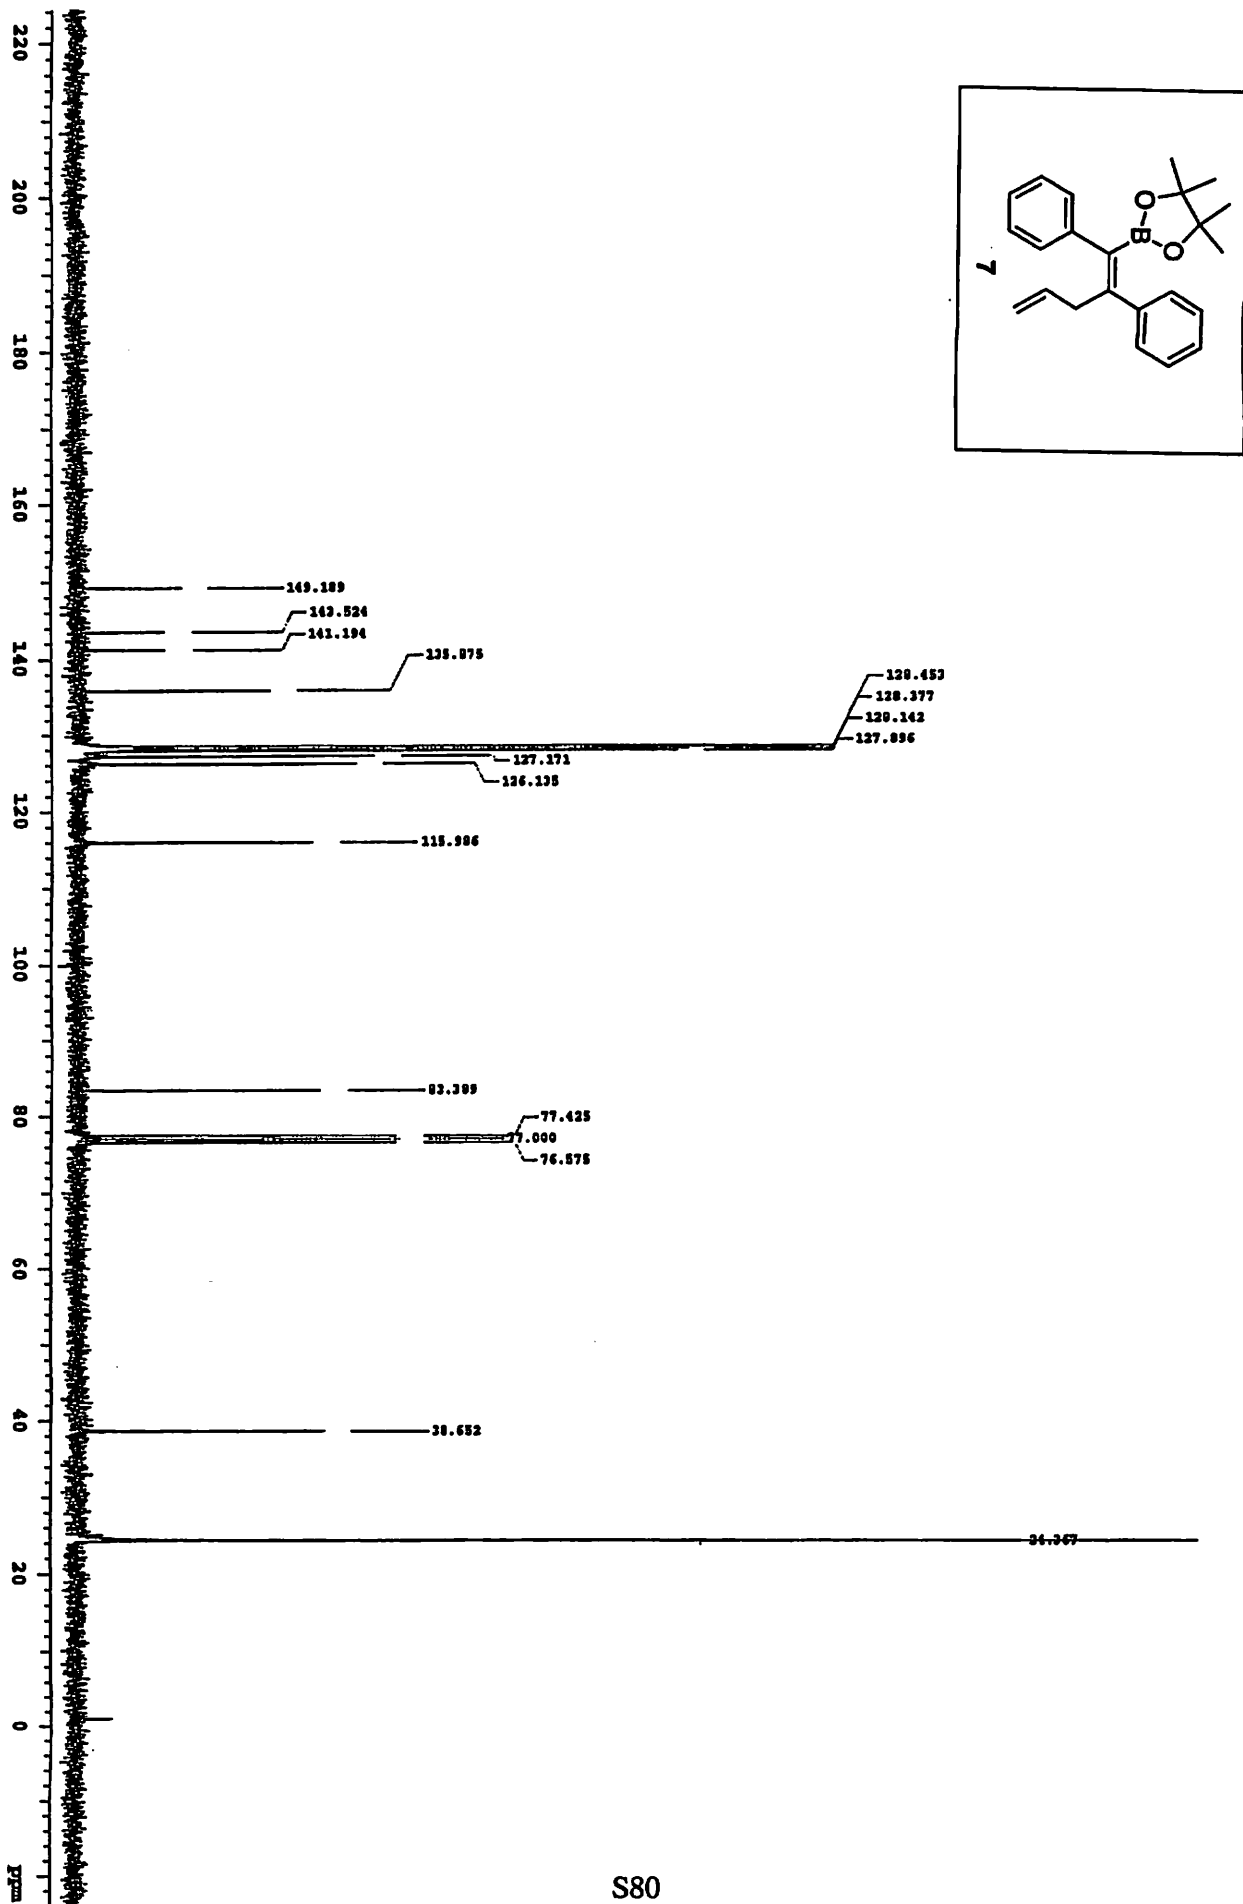

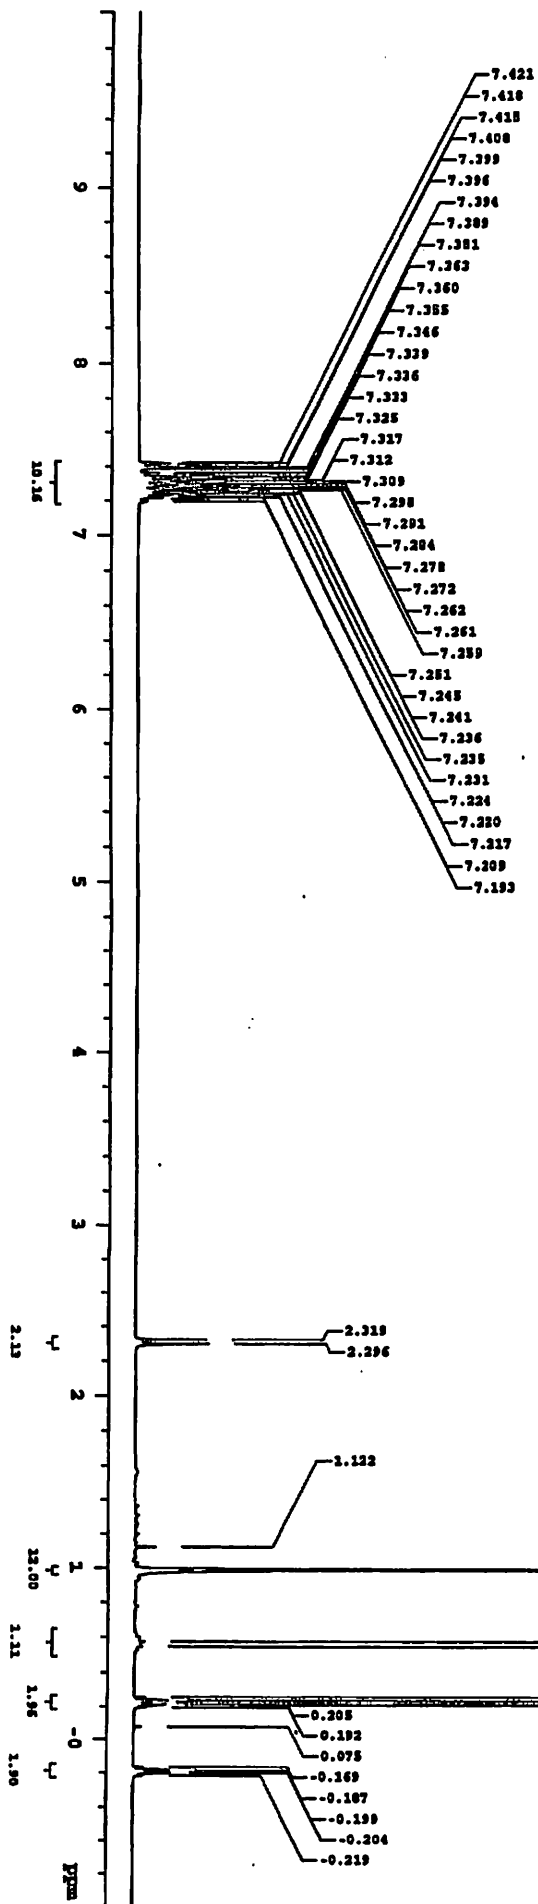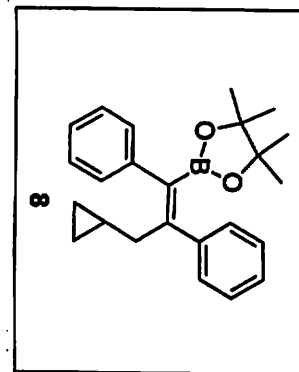

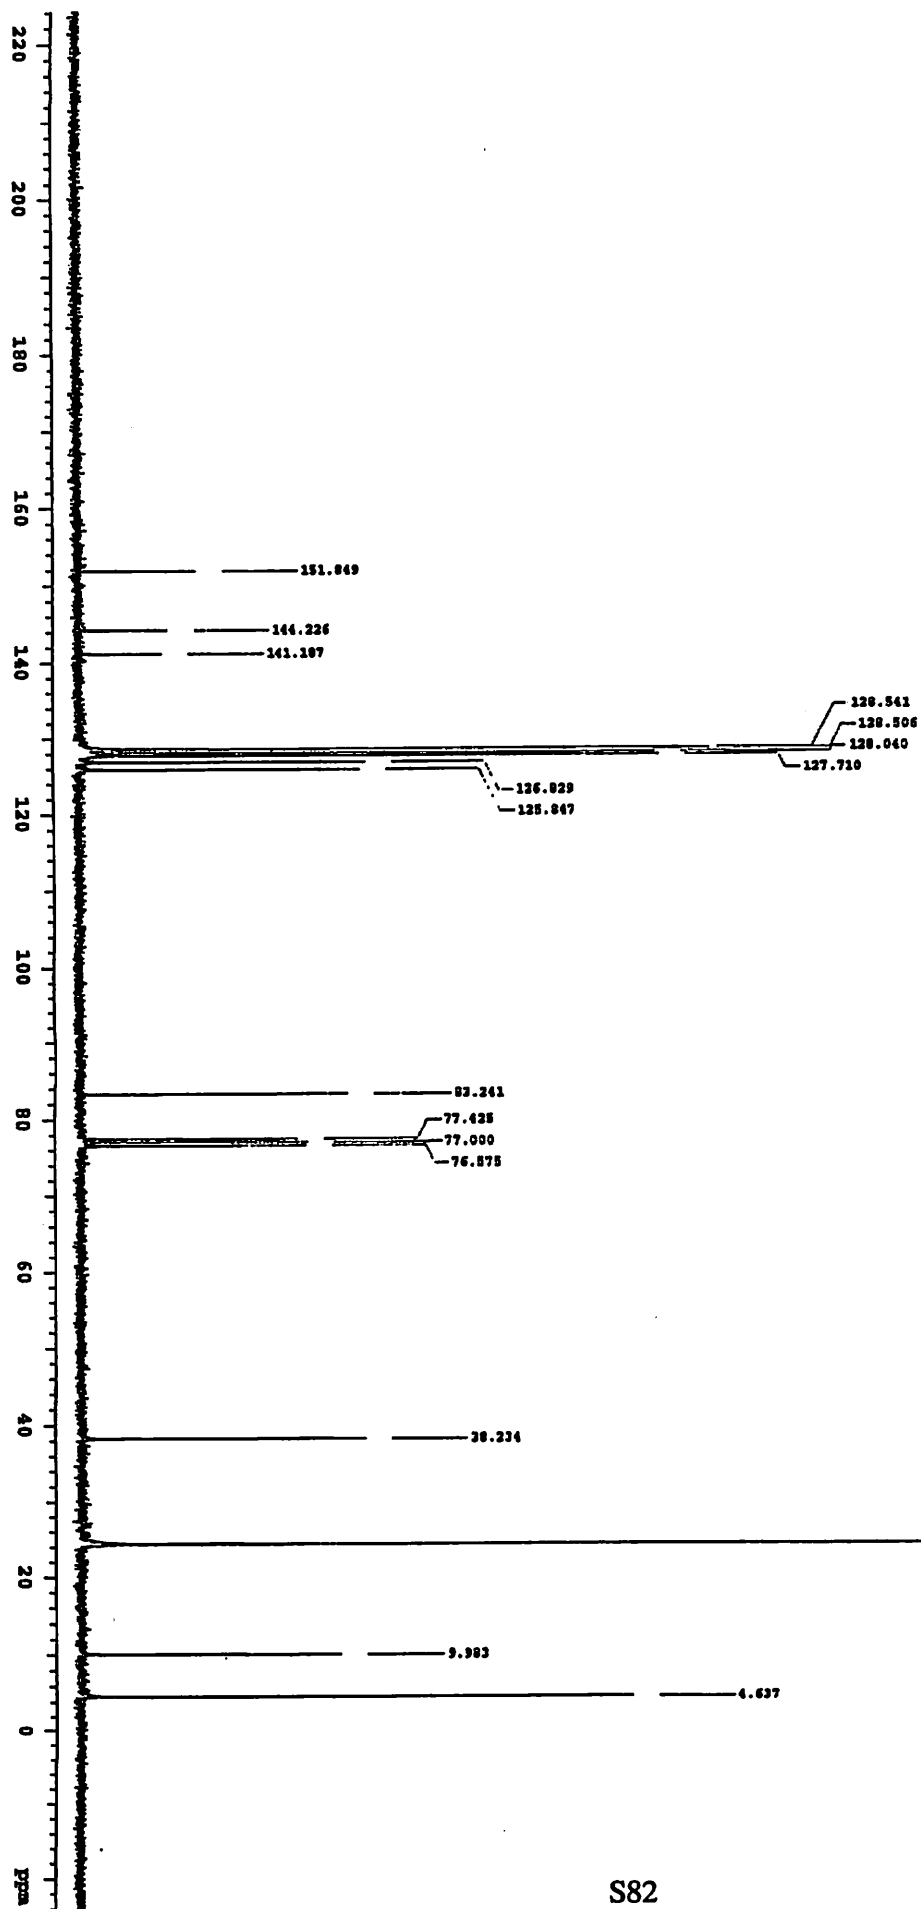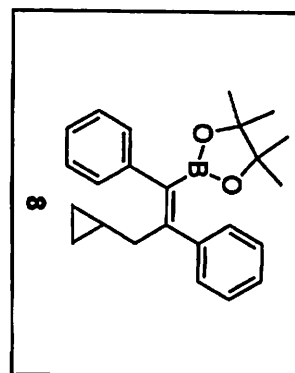

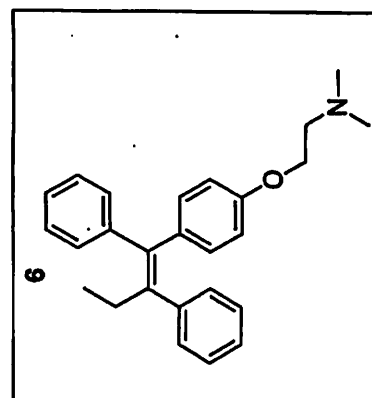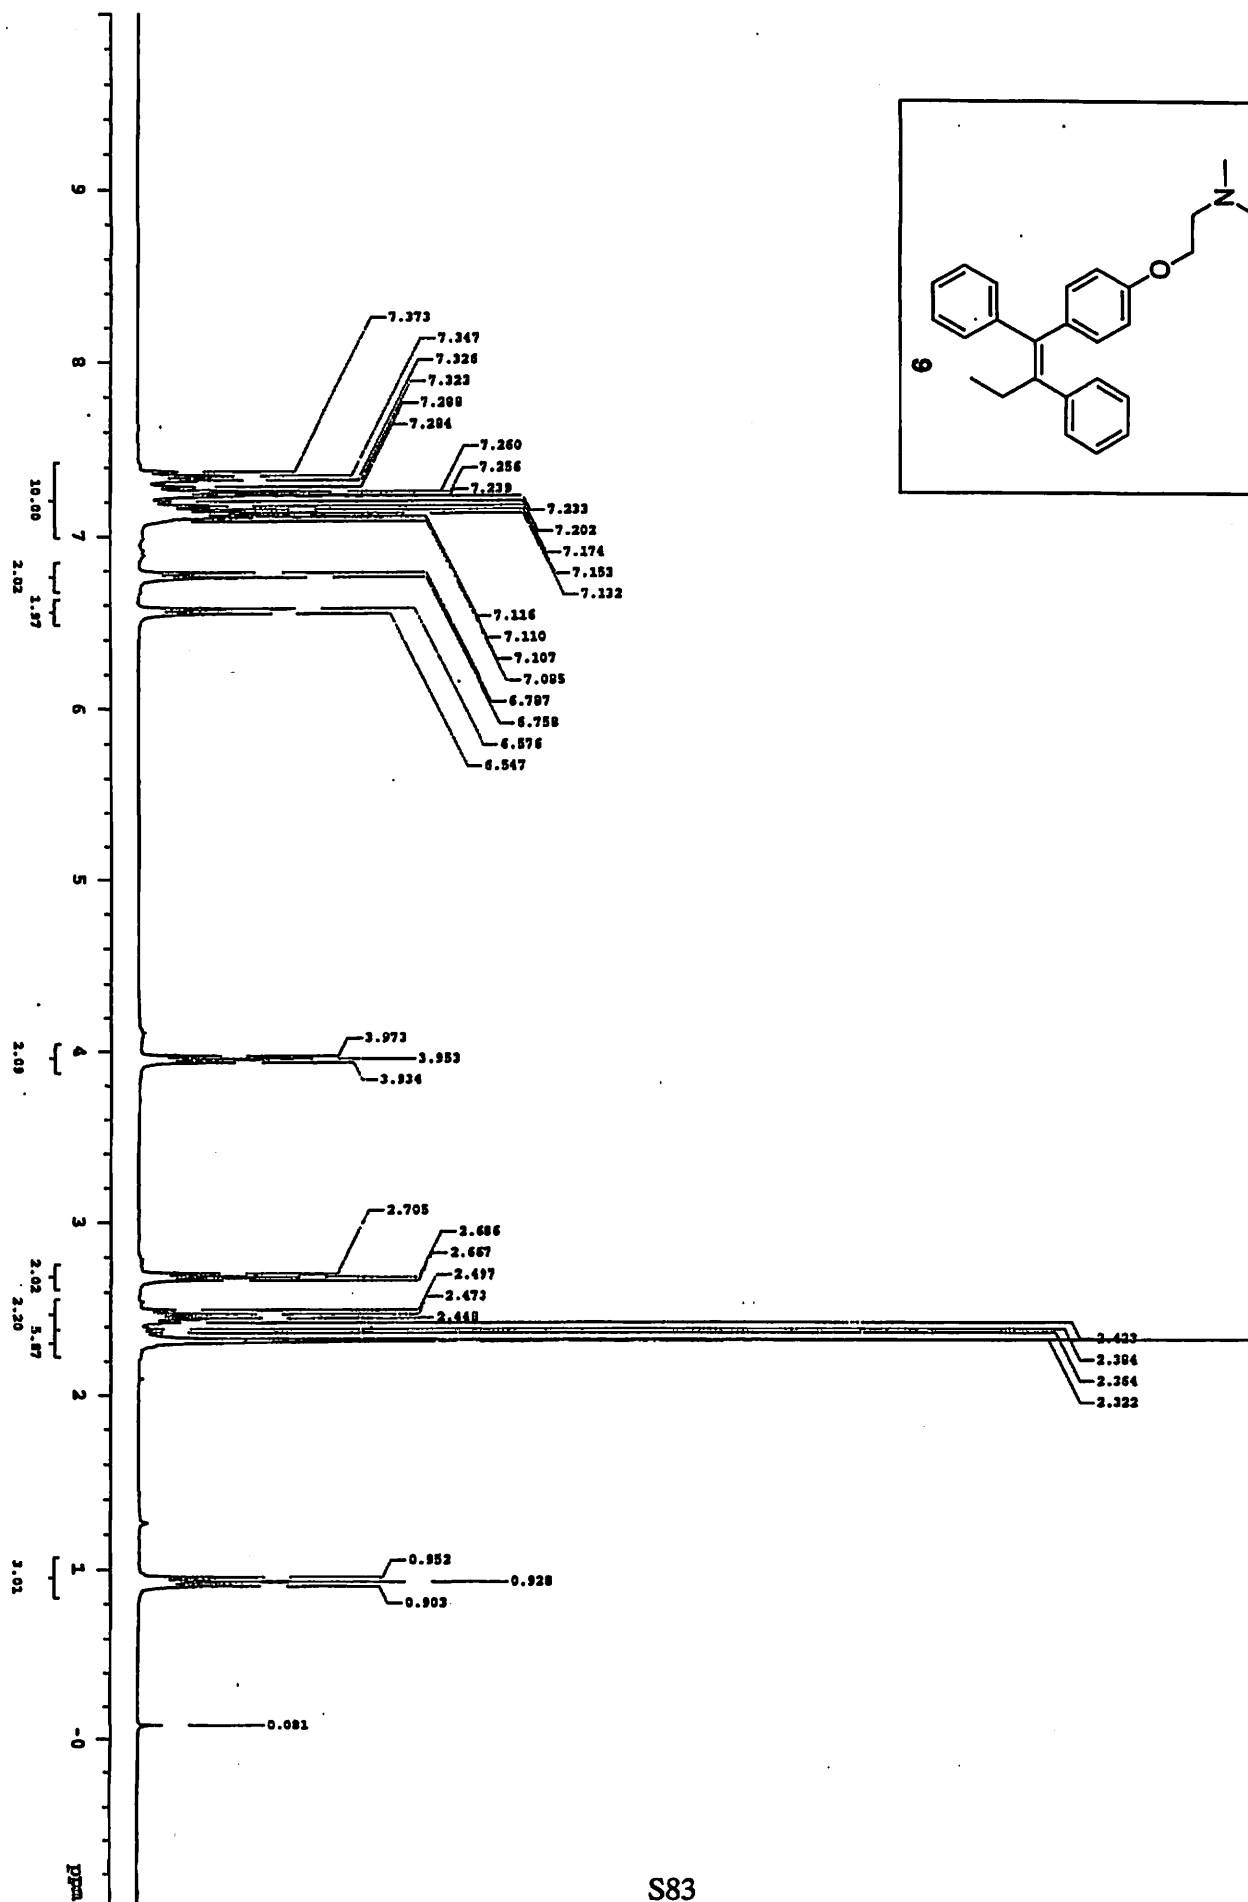

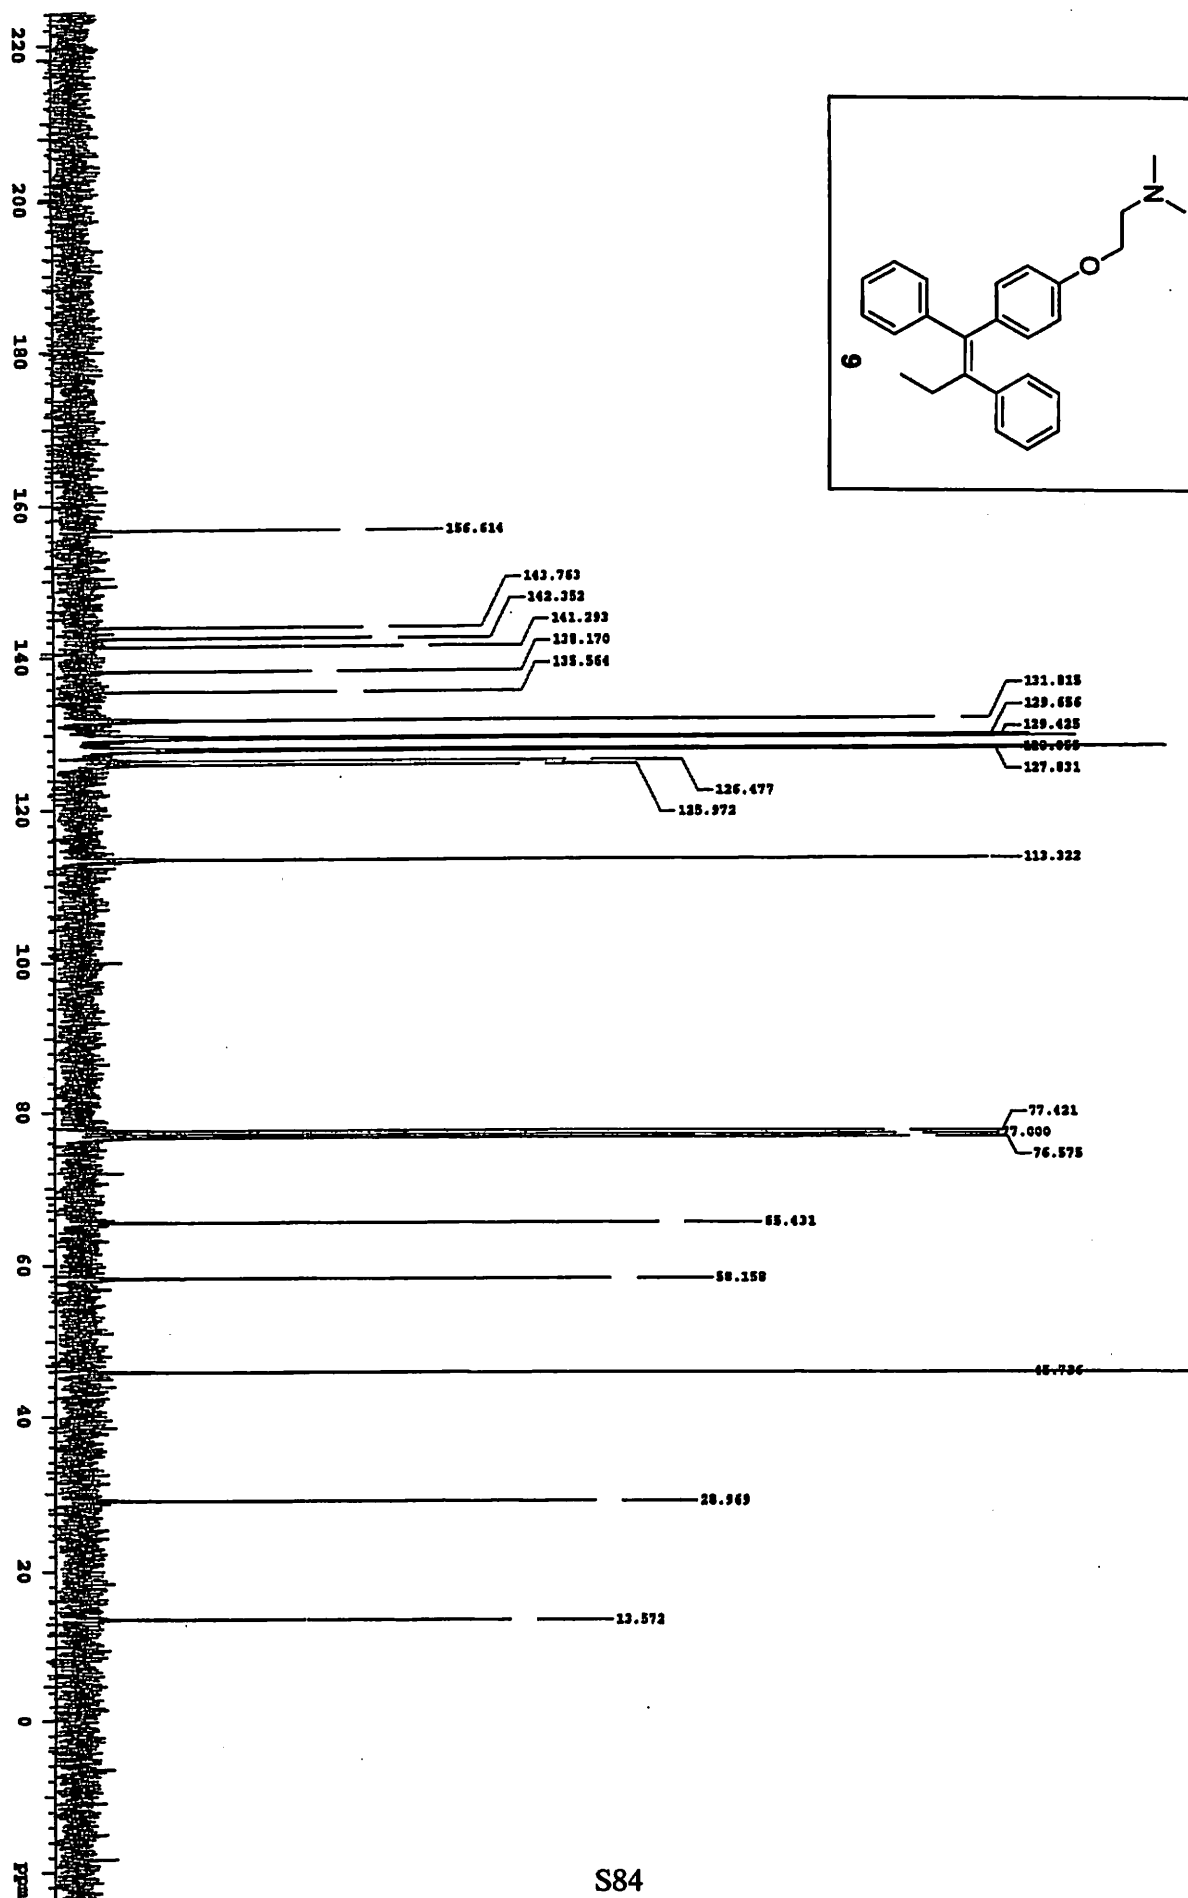

Supplement: Supplementary file 1 [file 4680037]
